# Supplementary material
Source: PubMed Central journal article supplement (PMC4136479)
Supplement: NIHMS576591-supplement-STable_1.pdf [file NIHMS576591-supplement-STable_1.pdf]

**Supplementary Table S1.** Patient Sample Summary

| Patient | Primary Tumor Site <sup>a</sup> | Sex <sup>b</sup> | Age | T <sup>c</sup> | N <sup>c</sup> | M <sup>c</sup> | Sample Set No. | Tissue Profiled <sup>d</sup> | Array Type |
|---------|---------------------------------|------------------|-----|----------------|----------------|----------------|----------------|------------------------------|------------|
| 1       | Oropharynx/tonsil               | M                | 67  | 3              | 2              | 0              | 1              | N-P-M                        | HuGeneFL   |
| 2       | Oropharynx/tonsil               | M                | 47  | 4              | 2              | 0              | 2              | N-P-M                        | HuGeneFL   |
| 3       | Hypopharynx/pyriform sinus      | M                | 64  | 3              | 2              | 0              | 3              | N-P-M                        | HuGeneFL   |
|         |                                 |                  |     |                |                |                | 13             | N-P                          | HuGeneFL   |
| 5       | Larynx/subglottis               | M                | 76  | 4              | 2              | 0              | 5              | N-P-M                        | HuGeneFL   |
| 6       | Pharynx                         | M                | 50  | NA             | NA             | NA             | 6              | N-P-M                        | HuGeneFL   |
| 7       | Larynx/supraglottis             | M                | 48  | 2              | 3              | 0              | 7              | N-P-M                        | HuGeneFL   |
| 8       | Oral cavity/tongue              | M                | 65  | 3              | 2              | 0              | 8              | N-P-M                        | HuGeneFL   |
| 9       | Oral cavity/tongue              | M                | 45  | 3              | 1              | 0              | 9              | N-P-M                        | HuGeneFL   |
| 10      | Oropharynx/tonsil               | M                | 54  | 1              | 2              | 0              | 10             | N-P-M                        | HuGeneFL   |
| 11      | Larynx/glottis                  | M                | 64  | 4              | 1              | 0              | 11             | N-P-M                        | HuGeneFL   |
| 12      | Oropharynx/BOT                  | M                | 53  | 3              | 1              | 0              | 12             | N-P-M                        | HuGeneFL   |
| 14      | Oropharynx/BOT                  | M                | 49  | 4              | 0              | 0              | 14             | N-P                          | U95Av2     |
| 15      | Larynx/supraglottis             | F                | 54  | 2              | 1              | 0              | 15             | N-P-M                        | U95Av2     |
| 16      | Oral cavity/tongue              | F                | 78  | 3              | 2              | 0              | 16             | N-P-M                        | U95Av2     |
| 17      | Oropharynx/tonsil               | M                | 47  | 2              | 2              | 0              | 17             | N-P-M                        | U95Av2     |
| 18      | Larynx/supra                    | M                | 56  | 3              | 0              | 0              | 18             | N-P                          | U95Av2     |
| 19      | Larynx/glottis                  | M                | 54  | 4              | 0              | 0              | 19             | N-P                          | U95Av2     |
| 20      | Larynx/glottis                  | M                | 63  | 3              | 0              | 0              | 20             | N-P                          | U95Av2     |
| 21      | Larynx/glottis                  | M                | 59  | 2              | 0              | 0              | 21             | N-P                          | U95Av2     |
| 22      | Hypopharynx/pyriformis          | M                | 56  | 2              | 3              | 0              | 22             | N-P                          | U95Av2     |
| 23      | Hypopharynx/pyriformis          | M                | 61  | 3              | 2              | 0              | 23             | N-P                          | U95Av2     |
| 24      | Hypopharynx/cricoid             | F                | 62  | 3              | 1              | 0              | 24             | N-P                          | U95Av2     |
| 27      | Oral cavity/tongue              | M                | 67  | 2              | 0              | 0              | 27             | N-P                          | U95Av2     |
| 28      | Oropharynx/palate               | M                | 69  | 1              | 0              | 0              | 28             | N-P                          | U95Av2     |
| 29      | Oropharynx/tonsil               | F                | 70  | 2              | 1              | 0              | 29             | N-P                          | U95Av2     |
| 30      | Oral cavity/tongue              | M                | 30  | 3              | 0              | 0              | 30             | N-P                          | U95Av2     |
| 31      | Oropharynx/BOT                  | M                | 51  | 4              | 0              | 0              | 31             | N-P                          | U95Av2     |

<sup>a</sup>BOT, base of tongue. <sup>b</sup>M, male; F, female. <sup>c</sup>NA, not available. <sup>d</sup>N, normal adjacent tissue; P, primary tumor; M, metastatic lymph node.
