# Supplementary material
Source: PubMed Central journal article supplement (PMC4136479)
Supplement: NIHMS576591-supplement-STable_2.pdf [file NIHMS576591-supplement-STable_2.pdf]

**Genes with P > N in 28/28 Cases, Full Model**

| Hu6800 Probe Set | U95Av2 Probe Set | Gene Symbol     | Title                                                                                | LocusLink | Location           | Avg Positive Fold Change | #P>N Pseudo-Probe Set | Avg Positive Fold Change Pseudo-probe Sets |
|------------------|------------------|-----------------|--------------------------------------------------------------------------------------|-----------|--------------------|--------------------------|-----------------------|--------------------------------------------|
| X02761_s_at      | 31720_s_at       | <i>FN1</i>      | fibronectin 1                                                                        | 2335      | Chr:2q34           | 4.8172                   | 26                    | 4.8546                                     |
| M11433_at        | 38634_at         | <i>RBP1</i>     | retinol binding protein 1, cellular                                                  | 5947      | Chr:3q23           | 3.7898                   | 28                    | 4.5282                                     |
| L23808_at        | 1482_g_at        | <i>MMP12</i>    | matrix metalloproteinase 12 (macrophage elastase)                                    | 4321      | Chr:11q22.3        | 3.5229                   | 28                    | 3.1999                                     |
| U09278_at        | 39945_at         | <i>FAP</i>      | fibroblast activation protein, alpha                                                 | 2191      | Chr:2q23           | 3.3759                   | 26                    | 2.9672                                     |
| L23808_at        | 1481_at          | <i>MMP12</i>    | matrix metalloproteinase 12 (macrophage elastase)                                    | 4321      | Chr:11q22.3        | 3.2512                   | 28                    | 3.1999                                     |
| D83174_s_at      | 39167_r_at       | <i>SERPINH1</i> | serine (or cysteine) proteinase inhibitor, clade H (heat shock protein 47), member 2 | 872       | Chr:11q13.5        | 2.1886                   | NA                    | NA                                         |
| X87241_at        | 40454_at         | <i>FAT</i>      | FAT tumor suppressor homolog 1 (Drosophila)                                          | 2195      | Chr:4q34-q35       | 2.0733                   | 27                    | 2.6372                                     |
| D26599_at        | 1310_at          | <i>PSMB2</i>    | proteasome (prosome, macropain) subunit, beta type, 2                                | 5690      | Chr:1p34.2         | 1.9198                   | 28                    | 1.8895                                     |
| U89942_at        | 33127_at         | <i>LDXL2</i>    | lysyl oxidase-like 2                                                                 | 4017      | Chr:8p21.3-p21.2   | 1.8661                   | 26                    | 1.8319                                     |
| Y00264_at        | 41136_s_at       | <i>APP</i>      | amyloid beta (A4) precursor protein (protease nexin-II, Alzheimer disease)           | 351       | Chr:21q21.3        | 1.7894                   | 27                    | 1.9003                                     |
| S54005_s_at      | 31481_s_at       | <i>TMSB10</i>   | thymosin, beta 10                                                                    | 9168      | Chr:s              | 1.7589                   | 27                    | 1.8319                                     |
| Y00971_at        | 41490_at         | <i>PRPS2</i>    | phosphoribosyl pyrophosphate synthetase 2                                            | 2060      | Chr:Xp22.3-p22.2   | 1.6413                   | 28                    | 1.3296                                     |
| S79639_at        | 222_at           | <i>EXT1</i>     | exostosins (multiple) 1                                                              | 2131      | Chr:8q24.11-q24.13 | 1.3912                   | 28                    | 2.0816                                     |
| X80343_at        | 799_at           | <i>CDK5R1</i>   | cyclin-dependent kinase 5, regulatory subunit 1 (p35)                                | 8851      | Chr:17q11.2        | 1.0925                   | 18                    | 1.0099                                     |

**Genes with P > N in 27/28 Cases, Full Model**

| Hu6800 Probe Set | U95Av2 Probe Set | Gene Symbol     | Title                                                                                           | LocusLink | Location          | Avg Positive Fold Change | #P>N Pseudo-Probe Set | Avg Positive Fold Change Pseudo-probe Sets |
|------------------|------------------|-----------------|-------------------------------------------------------------------------------------------------|-----------|-------------------|--------------------------|-----------------------|--------------------------------------------|
| D13666_s_at      | 1451_s_at        | <i>OSF-2</i>    | osteoblast specific factor 2 (fasciadin I-like)                                                 | 10631     | Chr:13q13.1       | 9.3718                   | NA                    | NA                                         |
| X54925_at        | 38428_at         | <i>MMP1</i>     | matrix metalloproteinase 1 (interstitial collagenase)                                           | 4312      | Chr:11q22.3       | 7.1338                   | 28                    | 10.9447                                    |
| Z74616_s_at      | 32305_at         | <i>COL1A2</i>   | collagen, type I, alpha 2                                                                       | 1278      | Chr:7q22.1        | 6.473                    | 26                    | 6.5443                                     |
| X02761_s_at      | 31719_at         | <i>FN1</i>      | fibronectin 1                                                                                   | 2335      | Chr:2q34          | 4.7859                   | 26                    | 4.8546                                     |
| Z74616_s_at      | 32307_s_at       | <i>COL1A2</i>   | collagen, type I, alpha 2                                                                       | 1278      | Chr:7q22.1        | 4.9296                   | 26                    | 6.5443                                     |
| Y00787_s_at      | 35372_r_at       | <i>IL8</i>      | interleukin 8                                                                                   | 3576      | Chr:4q13-q21      | 4.9708                   | 27                    | 4.0986                                     |
| X06700_s_at      | 32488_at         | <i>COL3A1</i>   | collagen, type III, alpha 1 (Ehlers-Danlos syndrome type IV, autosomal dominant)                | 1281      | Chr:2q31          | 4.7913                   | 26                    | 5.1993                                     |
| J03040_at        | 671_at           | <i>SPARC</i>    | secreted protein, acidic, cysteine-rich (osteonectin)                                           | 6678      | Chr:5q31.3-q32    | 3.5082                   | 27                    | 3.4558                                     |
| M17349_at        | 1385_at          | <i>TGFB1</i>    | transforming growth factor, beta-induced, 68kDa                                                 | 7045      | Chr:5q31          | 3.464                    | 26                    | 4.289                                      |
| X01060_at        | 37324_at         | <i>TFR3</i>     | transferin receptor (p90, CD71)                                                                 | 7037      | Chr:3q26.2-qter   | 2.795                    | 25                    | 1.2945                                     |
| M14648_at        | 39071_at         | <i>ITGAV</i>    | integrin, alpha V (vitronectin receptor, alpha polypeptide, antigen CD51)                       | 3685      | Chr:2q31-q32      | 2.606                    | 24                    | 1.6066                                     |
| X63629_at        | 160031_at        | <i>CDH4</i>     | cadherin 3, type 1, P-cadherin (placental)                                                      | 1001      | Chr:16q22.1       | 2.4914                   | NA                    | NA                                         |
| M26958_s_at      | 37989_at         | <i>PTH1H</i>    | parathyroid hormone-like hormone                                                                | 5744      | Chr:12p12.1-p11.2 | 2.3448                   | 25                    | 3.5641                                     |
| Z29083_at        | 368_at           | <i>TPBG</i>     | trophoblast glycoprotein                                                                        | 7162      | Chr:6q14-q15      | 2.2827                   | NA                    | NA                                         |
| M13755_at        | 1107_s_at        | <i>G1P2</i>     | interferon, alpha-inducible protein (clone IFI-15K)                                             | 9636      | Chr:1p36.33       | 2.3093                   | 26                    | 3.0097                                     |
| M87339_at        | 1055_g_at        | <i>RFC4</i>     | replication factor C (activator 1) 4, 37kDa                                                     | 5984      | Chr:3q27          | 2.2961                   | 26                    | 1.9819                                     |
| M14648_at        | 257_at           | <i>ITGAV</i>    | integrin, alpha V (vitronectin receptor, alpha polypeptide, antigen CD51)                       | 3685      | Chr:2q31-q32      | 2.3037                   | 24                    | 1.6066                                     |
| U30521_at        | 39710_at         | <i>P311</i>     | P311 protein                                                                                    | 9315      | Chr:5q22.1        | 2.2897                   | 26                    | 2.6767                                     |
| X53587_at        | 406_at           | <i>ITGB4</i>    | integrin, beta 4                                                                                | 3691      | Chr:17q11-qter    | 2.2302                   | NA                    | NA                                         |
| U26312_s_at      | 39805_at         | <i>CBX3</i>     | chromobox homolog 3 (HP1 gamma homolog, Drosophila)                                             | 11335     | Chr:7p15.2        | 2.1596                   | 28                    | 2.2976                                     |
| X54941_at        | 37347_at         | <i>CBX1B</i>    | CDC28 protein kinase regulatory subunit 1B                                                      | 1163      | Chr:1q21.2        | 2.1279                   | 27                    | 2.0001                                     |
| U26312_s_at      | 39804_at         | <i>CBX3</i>     | chromobox homolog 3 (HP1 gamma homolog, Drosophila)                                             | 11335     | Chr:7p15.2        | 1.9879                   | 26                    | 2.2376                                     |
| M13755_at        | 38432_at         | <i>G1P2</i>     | interferon, alpha-inducible protein (clone IFI-15K)                                             | 9636      | Chr:1p36.33       | 2.01                     | 26                    | 3.0097                                     |
| S57132_s_at      | 35168_f_at       | <i>COL16A1</i>  | collagen, type XVI, alpha 1                                                                     | 1307      | Chr:1p35-p34      | 1.9124                   | 26                    | 2.424                                      |
| U59877_s_at      | 33371_s_at       | <i>RAB31</i>    | RAB31, member RAS oncogene family                                                               | 11031     | Chr:18p11.3       | 1.8937                   | 26                    | 2.0064                                     |
| M91670_at        | 893_at           | <i>E2-EFF</i>   | ubiquitin carrier protein                                                                       | 27338     | Chr:19q13.43      | 1.8632                   | 28                    | 1.8044                                     |
| M91670_at        | 40619_at         | <i>E2-EFF</i>   | ubiquitin carrier protein                                                                       | 27338     | Chr:19q13.43      | 1.7715                   | 28                    | 1.8044                                     |
| M69066_at        | 40771_at         | <i>MSN</i>      | moesin                                                                                          | 4478      | Chr:Xq11.2-q12    | 1.7443                   | 27                    | 2.2236                                     |
| D59253_at        | 32790_at         | <i>NCBP2</i>    | nuclear cap binding protein subunit 2, 20kDa                                                    | 22916     | Chr:3q29          | 1.6626                   | 27                    | 1.7779                                     |
| D83174_s_at      | 39166_s_at       | <i>SERPINH1</i> | serine (or cysteine) proteinase inhibitor, clade H (heat shock protein 47), member 2            | 872       | Chr:11q13.5       | 1.6048                   | NA                    | NA                                         |
| M91670_at        | 894_g_at         | <i>E2-EFF</i>   | ubiquitin carrier protein                                                                       | 27338     | Chr:19q13.43      | 1.5955                   | 28                    | 1.8044                                     |
| U44754_at        | 35488_at         | <i>SNAPC1</i>   | small nuclear RNA activating complex, polypeptide 1, 43kDa                                      | 6617      | Chr:14q22         | 1.585                    | NA                    | NA                                         |
| V00599_s_at      | 151_s_at         | ---             | Beta-tubulin [Homo sapiens], mRNA sequence                                                      | ---       | ---               | 1.5855                   | ---                   | ---                                        |
| M25753_at        | 1945_at          | <i>CENB1</i>    | cyclin B1                                                                                       | 1945      | Chr:5q12          | 1.5813                   | 25                    | 1.6275                                     |
| X56494_at        | 32378_at         | <i>PKM2</i>     | pyruvate kinase, muscle                                                                         | 5315      | Chr:15q22         | 1.5069                   | 27                    | 1.5883                                     |
| M24766_s_at      | 36659_at         | <i>COL4A2</i>   | collagen, type IV, alpha 2                                                                      | 1284      | Chr:13q34         | 1.5044                   | 26                    | 2.6824                                     |
| D38521_at        | 36978_at         | <i>PA200</i>    | proteasome activator 200 kDa                                                                    | 23198     | Chr:2p16.1        | 1.4759                   | 25                    | 1.5086                                     |
| U69611_at        | 1226_at          | <i>ADAM17</i>   | a disintegrin and metalloproteinase domain 17 (tumor necrosis factor, alpha, converting enzyme) | 6868      | Chr:2p25          | 1.4767                   | 21                    | 1.2626                                     |
| U90313_at        | 824_at           | <i>GSTTLp28</i> | glutathione-S-transferase like: glutathione transferase omega                                   | 9446      | Chr:10q24.33      | 1.4447                   | NA                    | NA                                         |
| U37689_at        | 35631_at         | <i>POLR2H</i>   | polymerase (RNA) II (DNA directed) polypeptide H                                                | 5437      | Chr:3q28          | 1.4186                   | 28                    | 1.5536                                     |
| M14328_s_at      | 2035_s_at        | <i>ENO1</i>     | enolase 1, (alpha)                                                                              | 2023      | Chr:1p36.3-p36.2  | 1.4478                   | NA                    | NA                                         |
| X95404_at        | 33659_at         | <i>CFL1</i>     | cofilin 1 (non-muscle)                                                                          | 1072      | Chr:11q13         | 1.4184                   | 26                    | 1.4742                                     |
| X64330_at        | 40881_at         | <i>ACLY</i>     | ATP citrate lyase                                                                               | 47        | Chr:17q12-q21     | 1.3828                   | 26                    | 1.4283                                     |
| M57730_at        | 40425_at         | <i>EFNA1</i>    | ephrin-A1                                                                                       | 1942      | Chr:1q21-q22      | 1.3364                   | 25                    | 1.8718                                     |
| X05360_at        | 1803_at          | <i>CDC2</i>     | cell division cycle 2, G1 to S and G2 to M                                                      | 983       | Chr:10q21.1       | 1.327                    | 21                    | 1.1916                                     |
| AF010193_at      | 1857_at          | <i>MADH7</i>    | MAD, mothers against decapentaplegic homolog 7 (Drosophila)                                     | 4092      | Chr:18q21.1       | 1.3329                   | 21                    | 1.4011                                     |
| U37689_at        | 3790_at          | <i>POLR2H</i>   | polymerase (RNA) II (DNA directed) polypeptide H                                                | 5437      | Chr:3q28          | 1.3305                   | 28                    | 1.5536                                     |
| U08991_at        | 37901_at         | <i>PIK3R4</i>   | phosphoinositide-3-kinase, regulatory subunit 4, p150                                           | 30849     | Chr:3q22.1        | 1.2744                   | 17                    | 1.1302                                     |
| U30888_at        | 36982_at         | <i>USP14</i>    | ubiquitin specific protease 14 (fRNA-guanine transglycosylase)                                  | 9097      | Chr:18p11.32      | 1.2679                   | NA                    | NA                                         |
| U61836_at        | 1649_at          | <i>C2orf16</i>  | chromosome 20 open reading frame 16                                                             | 54498     | Chr:20p13         | 1.1368                   | 19                    | 1.1443                                     |

**Genes with P > N in 26/28 Cases, Full Model**

| Hu6800 Probe Set | U95Av2 Probe Set | Gene Symbol     | Title                                                                                                               | LocusLink | Location          | Avg Positive Fold Change | #P>N Pseudo-Probe Set | Avg Positive Fold Change Pseudo-probe Sets |
|------------------|------------------|-----------------|---------------------------------------------------------------------------------------------------------------------|-----------|-------------------|--------------------------|-----------------------|--------------------------------------------|
| Z74616_s_at      | 32306_g_at       | <i>COL1A2</i>   | collagen, type I, alpha 2                                                                                           | 1278      | Chr:7q22.1        | 6.7845                   | 26                    | 6.5443                                     |
| X52022_at        | 38077_at         | <i>COL6A3</i>   | collagen, type VI, alpha 3                                                                                          | 1293      | Chr:2q37          | 4.0842                   | 26                    | 3.2845                                     |
| M24351 cds3_s_at | 37989_at         | <i>PTH1H</i>    | parathyroid hormone-like hormone                                                                                    | 5744      | Chr:12p12.1-p11.2 | 3.804                    | 25                    | 3.5641                                     |
| D21255_at        | 36976_at         | <i>CDH11</i>    | cadherin 11, type 2, OB-cadherin (osteoblast)                                                                       | 1009      | Chr:16q22.1       | 3.0066                   | 25                    | 2.8645                                     |
| U21128_at        | 38038_at         | <i>LUM</i>      | lumican                                                                                                             | 4060      | Chr:12q21.3-q22   | 2.5816                   | 25                    | 2.3701                                     |
| X04729_s_at      | 38125_at         | <i>SERPINE1</i> | serine (or cysteine) proteinase inhibitor, clade E (nexin, plasminogen activator inhibitor type 1), member 1        | 5054      | Chr:7q21.3-q22    | 2.2652                   | 27                    | 5.3105                                     |
| X83416_s_at      | 36159_s_at       | <i>PRNP</i>     | prion protein (p27-30) (Creutzfeldt-Jakob disease, Gerstmann-Strausler-Scheinker syndrome, fatal familial insomnia) | 5621      | Chr:20pter-p12    | 2.1041                   | 27                    | 1.9481                                     |
| X15882_at        | 34802_s_at       | <i>COL6A2</i>   | collagen, type VI, alpha 2                                                                                          | 1292      | Chr:21q22.3       | 2.0996                   | 27                    | 1.8081                                     |
| M11718_at        | 38420_at         | <i>COL5A2</i>   | collagen, type V, alpha 2                                                                                           | 1290      | Chr:2q14-q32      | 2.0637                   | 25                    | 2.9708                                     |
| X53586_ma1_at    | 41266_at         | <i>ITGA6</i>    | integrin, alpha 6                                                                                                   | 3655      | Chr:2q31.1        | 2.0202                   | 25                    | 1.7071                                     |
| M83216_s_at      | 41739_s_at       | <i>CALD1</i>    | caldesmon 1                                                                                                         | 800       | Chr:7q33          | 2.0056                   | NA                    | NA                                         |
| M61916_at        | 581_at           | <i>LAMB1</i>    | laminin, beta 1                                                                                                     | 3912      | Chr:7q22          | 1.91                     | 26                    | 1.8125                                     |
| M95178_at        | 39330_s_at       | <i>ACTN1</i>    | actinin, alpha 1                                                                                                    | 87        | Chr:14q24         | 1.88                     | 25                    | 2.1157                                     |
| M97935_s_at      | 32860_g_at       | <i>STAT1</i>    | signal transducer and activator of transcription 1, 91kDa                                                           | 6772      | Chr:2q32.2        | 1.9029                   | 26                    | 1.5338                                     |
| Z24724_at        | 34857_at         | <i>FLJ20986</i> | hypothetical protein FLJ20986                                                                                       | 79572     | Chr:3q29          | 1.8595                   | 26                    | 1.7994                                     |

|             |            |          |                                                                                                              |       |                     |        |    |        |
|-------------|------------|----------|--------------------------------------------------------------------------------------------------------------|-------|---------------------|--------|----|--------|
| D80008_at   | 39677_at   | KIAA0186 | KIAA0186 gene product                                                                                        | 9837  | Chr:20p11.1         | 1.8405 | 25 | 1.4829 |
| X57522_at   | 40153_at   | TAP1     | transporter 1, ATP-binding cassette, sub-family B (MDR/TAP)                                                  | 6890  | Chr:6p21.3          | 1.8185 | 25 | 1.6586 |
| X89750_at   | 38805_at   | TGIF     | TGFB-induced factor (TALE family homeobox)                                                                   | 7050  | Chr:18p11.3         | 1.7745 | 27 | 1.8513 |
| M94880_f_at | 41237_at   | HLA-A    | major histocompatibility complex, class I, A                                                                 | 3105  | Chr:6p21.3          | 1.7905 | NA | NA     |
| M11147_at   | 35083_at   | FTL      | ferritin, light polypeptide                                                                                  | 2512  | Chr:19q13.3-q13.4   | 1.7496 | 25 | 1.7467 |
| X15890_at   | 38722_at   | COL6A1   | collagen, type VI, alpha 1                                                                                   | 1291  | Chr:21q22.3         | 1.7601 | 25 | 1.8253 |
| D31887_at   | 38797_at   | KIAA0062 | KIAA0062 protein                                                                                             | 23516 | Chr:8p21.2          | 1.8026 | 26 | 1.8846 |
| X17567_s_at | 38455_at   | SNRBP    | small nuclear ribonucleoprotein polypeptides B and B1                                                        | 6628  | Chr:20p13           | 1.7465 | 25 | 1.6195 |
| D32129_f_at | 41237_at   | HLA-A    | major histocompatibility complex, class I, A                                                                 | 3105  | Chr:6p21.3          | 1.7364 | NA | NA     |
| U01691_s_at | 37747_at   | ANXA5    | annexin A5                                                                                                   | 308   | Chr:4q28-q32        | 1.7516 | 26 | 1.5169 |
| AF006084_at | 39043_at   | ARPC1B   | actin related protein 2/3 complex, subunit 1B, 41kDa                                                         | 10095 | Chr:7q22.1          | 1.7055 | 26 | 1.9137 |
| X05610_at   | 36659_at   | COL4A2   | collagen, type IV, alpha 2                                                                                   | 1284  | Chr:13q34           | 1.6796 | 26 | 2.6924 |
| D83777_at   | 36192_at   | KIAA0193 | KIAA0193 gene product                                                                                        | 9805  | Chr:7p14.3-p14.1    | 1.638  | 25 | 1.5894 |
| S78187_at   | 1347_at    | CDC25B   | cell division cycle 25B                                                                                      | 994   | Chr:20p13           | 1.6114 | NA | NA     |
| M15205_at   | 910_at     | TK1      | thymidine kinase 1, soluble                                                                                  | 7083  | Chr:17q23.2-q25.3   | 1.6249 | 26 | 1.4111 |
| U44772_at   | 34774_at   | PPT1     | palmitoyl-protein thioesterase 1 (ceroid-lipofuscinosis, neuronal 1, infantile)                              | 5538  | Chr:1p32            | 1.5854 | 25 | 1.6217 |
| X15183_at   | 32316_s_at | HSPCA    | heat shock 90kDa protein 1, alpha                                                                            | 3320  | Chr:14q32.33        | 1.5737 | NA | NA     |
| K03195_at   | 40507_at   | SLC2A1   | solute carrier family 2 (facilitated glucose transporter), member 1                                          | 6513  | Chr:1p35-p31.3      | 1.5919 | NA | NA     |
| U55206_at   | 37263_at   | GGH      | gamma-glutamyl hydrolase (conjugase, lipo/polylipopolysaccharide/glutamate) hydrolase                        | 8636  | Chr:8q12.1          | 1.5726 | 22 | 1.687  |
| X00589_at   | 1537_at    | EGFR     | epidermal growth factor receptor (erythroblastic leukemia viral (v-erb-b) oncogene homolog, avian)           | 1956  | Chr:7p12            | 1.5906 | 22 | 1.603  |
| M97335_s_at | 33338_at   | STAT1    | signal transducer and activator of transcription 1, 91kDa                                                    | 6772  | Chr:2q32.2          | 1.6061 | 26 | 1.5338 |
| X91247_at   | 39425_at   | TXNRD1   | thioredoxin reductase 1                                                                                      | 7296  | Chr:12q23-q24.1     | 1.5322 | 25 | 1.7157 |
| X17620_at   | 1521_at    | NME1     | non-metastatic cells 1, protein (NM23A) expressed in                                                         | 4830  | Chr:17q21.3         | 1.5425 | 24 | 1.4482 |
| L25081_at   | 1395_at    | ARHC     | ras homolog gene family, member C                                                                            | 389   | Chr:1p21-p13        | 1.5401 | NA | NA     |
| D21261_at   | 36678_at   | TAGLN2   | transgelin 2                                                                                                 | 8407  | Chr:1q21-q25        | 1.5065 | 26 | 1.5569 |
| J03909_at   | 925_at     | IFI30    | interferon, gamma-inducible protein 30                                                                       | 10437 | Chr:19p13.1         | 1.5366 | 25 | 1.8959 |
| U51586_at   | 36145_at   | SIAHBP1  | fuse-binding protein-interacting repressor                                                                   | 22827 | Chr:8q24.2-qtel     | 1.4927 | 27 | 1.3748 |
| D00760_at   | 1446_at    | PSMA2    | proteasome (prosome, macropain) subunit, alpha type, 2                                                       | 5683  | Chr:7p13            | 1.5184 | 24 | 1.4343 |
| D83018_at   | 32598_at   | NELL2    | NEL-like 2 (chicken)                                                                                         | 4753  | Chr:12q13.11-q13.12 | 1.4674 | 21 | 1.5097 |
| U84573_at   | 34795_at   | PLOD2    | procollagen-lysine, 2-oxoglutarate 5-dioxygenase (lysine hydroxylase) 2                                      | 5352  | Chr:3q23-q24        | 1.4539 | 25 | 2.5939 |
| Y00281_at   | 33424_at   | RPN1     | ribophorin 1                                                                                                 | 6184  | Chr:3q21.3-q25.2    | 1.4607 | 27 | 1.6325 |
| X03327_at   | 32340_s_at | NSEP1    | nuclease sensitive element binding protein 1                                                                 | 4594  | Chr:1p34            | 1.473  | NA | NA     |
| XT0476_at   | 36677_at   | COBP2    | coatomer protein complex, subunit beta 2 (beta prime)                                                        | 9276  | Chr:8q23            | 1.4611 | 23 | 1.3143 |
| X05360_at   | 33324_s_at | CDC2     | cell division cycle 2, G1 to S and G2 to M                                                                   | 983   | Chr:10q21.1         | 1.4522 | 21 | 1.1916 |
| D55716_at   | 947_at     | MCM7     | MCM7 minichromosome maintenance deficient 7 (S. cerevisiae)                                                  | 4176  | Chr:7q21.3-q22.1    | 1.4646 | 26 | 1.7899 |
| M86699_at   | 572_at     | TTK      | TTK protein kinase                                                                                           | 7272  | Chr:6q13-q21        | 1.4051 | 25 | 1.6027 |
| M94362_at   | 36987_at   | LMNB2    | lamin B2                                                                                                     | 84823 | Chr:19p13.3         | 1.387  | NA | NA     |
| U40271_s_at | 38819_at   | PTK7     | PTK7 protein tyrosine kinase 7                                                                               | 5754  | Chr:6p21.1-p12.2    | 1.3724 | 26 | 1.4587 |
| L02426_at   | 688_at     | PSMC1    | proteasome (prosome, macropain) 26S subunit, ATPase, 1                                                       | 5700  | Chr:14q32.11        | 1.39   | 25 | 1.371  |
| Z54367_s_at | 38021_at   | PLEC1    | plectin 1, intermediate filament binding protein 500kDa                                                      | 5339  | Chr:8q24            | 1.3787 | 24 | 1.4267 |
| M15205_at   | 41400_at   | TK1      | thymidine kinase 1, soluble                                                                                  | 7083  | Chr:17q23.2-q25.3   | 1.3538 | 26 | 1.4111 |
| D31884_at   | 34333_at   | KIAA0063 | KIAA0063 gene product                                                                                        | 9929  | Chr:22q13.1         | 1.3347 | NA | NA     |
| X04729_s_at | 672_at     | SERPINE1 | serine (or cysteine) proteinase inhibitor, clade E (nexin, plasminogen activator inhibitor type 1), member 1 | 5054  | Chr:7q21.3-q22      | 1.3365 | 27 | 5.3105 |
| D42041_at   | 37040_at   | CDAN1    | alpha glucosidase II alpha subunit                                                                           | 23193 | Chr:11q12.2         | 1.3574 | NA | NA     |
| D16581_at   | 35723_at   | NUDT1    | nudix (nucleoside diphosphate linked moiety X)-type motif 1                                                  | 4521  | Chr:7q22            | 1.3398 | 28 | 1.3792 |
| U45328_s_at | 838_s_at   | UBC21    | ubiquitin-conjugating enzyme E2 (UBC9 homolog, yeast)                                                        | 7329  | Chr:16p13.3         | 1.3241 | 26 | 1.252  |
| X74794_at   | 981_at     | MCM4     | MCM4 minichromosome maintenance deficient 4 (S. cerevisiae)                                                  | 4173  | Chr:8q12-q13        | 1.3085 | NA | NA     |
| X51688_at   | 1943_at    | CCNA2    | cyclin A2                                                                                                    | 890   | Chr:4q25-q31        | 1.2971 | 26 | 1.4332 |
| Y09022_at   | 38161_at   | NOT56L   | Not56 (D. melanogaster)-like protein                                                                         | 10195 | Chr:3q27.3          | 1.2789 | 26 | 1.4151 |
| D26361_at   | 34563_at   | KIF14    | kinesin family member 14                                                                                     | 9928  | Chr:1pter-q31.3     | 1.2796 | 28 | 1.4327 |
| Y07759_at   | 40571_at   | MYO5A    | myosin VA (heavy polypeptide 12, myosin)                                                                     | 4644  | Chr:15q21           | 1.2853 | 27 | 1.9508 |
| X99584_at   | 38738_at   | SMT3H1   | SMT3 suppressor of mi1 two 3 homolog 1 (yeast)                                                               | 6612  | Chr:21q22.3         | 1.2628 | NA | NA     |
| X65550_at   | 419_at     | MKI67    | antigen identified by monoclonal antibody Ki-67                                                              | 4288  | Chr:10q25-qtter     | 1.2427 | 23 | 1.2847 |
| U25975_at   | 1245_i_at  | PAK2     | p21 (CDKN1A)-activated kinase 2                                                                              | 5062  | Chr:3q29            | 1.2625 | 26 | 1.3014 |
| U40152_s_at | 38564_at   | ORC1L    | origin recognition complex, subunit 1-like (yeast)                                                           | 4998  | Chr:1p32            | 1.242  | 20 | 1.1301 |
| U60644_at   | 36151_at   | PLD3     | likely ortholog of mouse phospholipase D3                                                                    | 23646 | Chr:19q13.13        | 1.2355 | NA | NA     |
| X00589_at   | 37327_at   | EGFR     | epidermal growth factor receptor (erythroblastic leukemia viral (v-erb-b) oncogene homolog, avian)           | 1956  | Chr:7p12            | 1.2345 | 22 | 1.603  |
| Z28407_at   | 31505_at   | RPL8     | ribosomal protein L8                                                                                         | 6132  | Chr:8q24.3          | 1.2049 | 24 | 1.2453 |
| U09303_at   | 188_at     | EFNB1    | ephrin-B1                                                                                                    | 1947  | Chr:Xq12            | 1.1665 | 23 | 1.1949 |
| U09303_at   | 39721_at   | EFNB1    | ephrin-B1                                                                                                    | 1947  | Chr:Xq12            | 1.1535 | 23 | 1.1949 |
| L32866_at   | 40533_at   | BIRC5    | baculoviral IAP repeat-containing 5 (survivin)                                                               | 332   | Chr:17q25           | 1.1448 | NA | NA     |

### Genes with P > N in 25/28 Cases, Full Model

| Hu6800 Probe Set | U95Av2 Probe Set | Gene Symbol | Title                                                                                                     | LocusLink | Location          | Avg Positive Fold Change | #P>N Pseudo-Probe Set | Avg Positive Fold Change Pseudo-probe Sets |
|------------------|------------------|-------------|-----------------------------------------------------------------------------------------------------------|-----------|-------------------|--------------------------|-----------------------|--------------------------------------------|
| L34155_at        | 37909_at         | LAMA3       | laminin, alpha 3                                                                                          | 3909      | Chr:18q11.2       | 3.715                    | 25                    | 3.9287                                     |
| X75308_at        | 39632_at         | MMP13       | matrix metalloproteinase 13 (collagenase 3)                                                               | 4322      | Chr:11q22.3       | 3.4655                   | 21                    | 3.3942                                     |
| AB000220_at      | 377_q_at         | SEMA3C      | sema domain, immunoglobulin domain (Ig), short basic domain, secreted, (semaphorin) 3C                    | 10512     | Chr:7q21-q31      | 3.1614                   | 25                    | 2.6039                                     |
| X67325_at        | 425_at           | IFI27       | interferon, alpha-inducible protein 27                                                                    | 3429      | Chr:14q32         | 3.0731                   | NA                    | NA                                         |
| U37518_at        | 1715_at          | TNFSF10     | tumor necrosis factor (ligand) superfamily, member 10                                                     | 8743      | Chr:3q26          | 2.7222                   | 23                    | 2.4195                                     |
| U97188_at        | 37558_at         | KOC1        | IGF-II mRNA-binding protein 3                                                                             | 10643     | Chr:7p11          | 2.434                    | NA                    | NA                                         |
| M62424_at        | 41700_at         | F2R         | coagulation factor II (thrombin) receptor                                                                 | 2149      | Chr:5q13          | 2.4837                   | 23                    | 1.678                                      |
| M19267_s_at      | 36792_at         | TPM1        | tropomyosin 1 (alpha)                                                                                     | 7168      | Chr:15q22.1       | 2.3692                   | NA                    | NA                                         |
| Z24727_at        | 36792_at         | TPM1        | tropomyosin 1 (alpha)                                                                                     | 7168      | Chr:15q22.1       | 2.4191                   | NA                    | NA                                         |
| M20778_s_at      | 39377_at         | COL6A3      | collagen, type VI, alpha 3                                                                                | 38077     | Chr:2q37          | 2.3401                   | 26                    | 3.2845                                     |
| X53586_ma1_at    | 33411_q_at       | ITGA6       | integrin, alpha 6                                                                                         | 3655      | Chr:2q31.1        | 2.2653                   | 25                    | 1.7071                                     |
| M97935_s_at      | 33339_q_at       | STAT1       | signal transducer and activator of transcription 1, 91kDa                                                 | 6772      | Chr:2q32.2        | 2.2598                   | 26                    | 1.5338                                     |
| M26958_s_at      | 615_s_at         | PTHLH       | parathyroid hormone-like hormone                                                                          | 5744      | Chr:12p12.1-p11.2 | 2.2183                   | 25                    | 3.5641                                     |
| D49354_s_at      | 41780_at         | PPFIA1      | protein tyrosine phosphatase, receptor type, I polypeptide (PTPRF), interacting protein (liprin), alpha 1 | 8500      | Chr:11q13.1       | 2.0832                   | 26                    | 1.9863                                     |
| X53586_ma1_at    | 33410_at         | ITGA6       | integrin, alpha 6                                                                                         | 3655      | Chr:2q31.1        | 2.0576                   | 25                    | 1.7071                                     |
| X07820_at        | 1006_at          | MMP10       | matrix metalloproteinase 10 (stromelysin 2)                                                               | 4319      | Chr:11q22.3       | 1.9181                   | NA                    | NA                                         |
| M97936_at        | 32860_g_at       | STAT1       | signal transducer and activator of transcription 1, 91kDa                                                 | 6772      | Chr:2q32.2        | 2.0283                   | 26                    | 1.5338                                     |
| M63838_s_at      | 1456_s_at        | IFI16       | interferon, gamma-inducible protein 16                                                                    | 3428      | Chr:1q22          | 1.9692                   | NA                    | NA                                         |
| X53416_at        | 32749_s_at       | FLNA        | filamin A, alpha (actin binding protein 280)                                                              | 2316      | Chr:Xq28          | 1.9322                   | 25                    | 1.7746                                     |
| L49054_at        | 33139_s_at       | MLF1        | myeloid leukemia factor 1                                                                                 | 4291      | Chr:3q25.1        | 1.9808                   | 23                    | 1.548                                      |
| U22815_at        | 41780_at         | PPFIA1      | protein tyrosine phosphatase, receptor type, I polypeptide (PTPRF), interacting protein (liprin), alpha 1 | 8500      | Chr:11q13.1       | 1.921                    | 26                    | 1.9863                                     |
| X84709_at        | 38765_at         | FADD        | Fas (TNFRSF6)-associated via death domain                                                                 | 8772      | Chr:11q13.3       | 1.8734                   | 24                    | 1.6594                                     |
| U51478_at        | 32563_at         | ATP1B3      | ATPase, Na(+)-K(+)-transporting, beta 3 polypeptide                                                       | 483       | Chr:3q22-q23      | 1.8996                   | 25                    | 1.9325                                     |
| U41766_s_at      | 34761_f_at       | ADAM9       | a disintegrin and metalloproteinase domain 9 (metrin gamma)                                               | 8754      | Chr:8p11.21       | 1.8975                   | 24                    | 1.4196                                     |
| S72487_at        | 36879_at         | ECGF1       | endothelial cell growth factor 1 (platelet-derived)                                                       | 1890      | Chr:22q13.33      | 1.8591                   | NA                    | NA                                         |

|             |            |                 |                                                                                                           |       |                   |        |    |         |
|-------------|------------|-----------------|-----------------------------------------------------------------------------------------------------------|-------|-------------------|--------|----|---------|
| M95178_at   | 39329_at   | <i>ACTN1</i>    | actinin, alpha 1                                                                                          | 87    | Chr:14q24         | 1.9233 | 25 | 2.1157  |
| U26424_at   | 32142_at   | <i>STK3</i>     | serine/threonine kinase 3 (STE20 homolog, yeast)                                                          | 6788  | Chr:8q22.1        | 1.8284 | 24 | 1.5155  |
| D49354_s_at | 944_s_at   | <i>PPP1A1</i>   | protein tyrosine phosphatase, receptor type, I polypeptide (PTPRF), interacting protein (liprin), alpha 1 | 8500  | Chr:11q13.1       | 1.783  | 26 | 1.9863  |
| U22431_s_at | 1039_s_at  | <i>HIF1A</i>    | hypoxia-inducible factor 1, alpha subunit (basic helix-loop-helix transcription factor)                   | 3091  | Chr:14q21-q24     | 1.7702 | 25 | 1.5075  |
| D43950_at   | 40417_at   | <i>CCT5</i>     | chaperonin containing TCP1, subunit 5 (epsilon)                                                           | 22948 | Chr:5p15.2        | 1.7375 | 24 | 1.6526  |
| X53587_at   | 38746_at   | <i>ITGB4</i>    | integrin, beta 4                                                                                          | 3691  | Chr:17q11-qter    | 1.641  | NA | NA      |
| U01062_at   | 182_at     | <i>ITPR3</i>    | inositol 1,4,5-triphosphate receptor, type 3                                                              | 3710  | Chr:6p21          | 1.7029 | 25 | 1.6014  |
| X53795_at   | 39056_at   | <i>PAICS</i>    | phosphoribosylaminoimidazole carboxylase, phosphoribosylaminoimidazole succinocarboxamide synthetase      | 10606 | Chr:terp-q21      | 1.7135 | NA | NA      |
| U01062_at   | 37343_at   | <i>ITPR3</i>    | inositol 1,4,5-triphosphate receptor, type 3                                                              | 3710  | Chr:6p21          | 1.6859 | 25 | 1.6014  |
| X54942_at   | 40690_at   | <i>CKS2</i>     | CDC28 protein kinase regulatory subunit 2                                                                 | 1164  | Chr:9q22          | 1.6811 | 26 | 2.0187  |
| U22815_at   | 944_s_at   | <i>PPP1A1</i>   | protein tyrosine phosphatase, receptor type, I polypeptide (PTPRF), interacting protein (liprin), alpha 1 | 8500  | Chr:11q13.1       | 1.6442 | 26 | 1.9863  |
| U30872_at   | 37302_at   | <i>CENPF</i>    | centromere protein F, 350/400kDa (mitosin)                                                                | 1063  | Chr:1q32-q41      | 1.6687 | 26 | 1.5942  |
| X57766_at   | 38181_at   | <i>MMP11</i>    | matrix metalloproteinase 11 (stromelysin 3)                                                               | 4320  | Chr:22q11.23      | 1.6497 | 27 | 3.0021  |
| M97936_at   | 33338_at   | <i>STAT1</i>    | signal transducer and activator of transcription 1, 91kDa                                                 | 6772  | Chr:2q32.2        | 1.712  | 26 | 1.5338  |
| X05360_at   | 40915_r_at | <i>CDC2</i>     | cell division cycle 2, G1 to S and G2 to M                                                                | 983   | Chr:10q21.1       | 1.6766 | 21 | 1.1916  |
| D59253_at   | 32789_at   | <i>NCBP2</i>    | nuclear cap binding protein subunit 2, 20kDa                                                              | 22916 | Chr:3q29          | 1.6434 | 27 | 1.7779  |
| D78577_s_at | 1424_s_at  | <i>YWHAH</i>    | tyrosine 3-monooxygenase/tryptophan 5-monooxygenase activation protein, eta polypeptide                   | 7533  | Chr:22q12.3       | 1.6886 | NA | NA      |
| U77949_at   | 1536_at    | <i>CDC6</i>     | CDC6 cell division cycle 6 homolog (S. cerevisiae)                                                        | 990   | Chr:17q21.3       | 1.629  | 26 | 1.6396  |
| D86425_at   | 753_at     | <i>NID2</i>     | nidogen 2 (osteonidogen)                                                                                  | 22795 | Chr:14q21-q22     | 1.6654 | NA | NA      |
| U96902_at   | 36135_at   | <i>EBNA1BP2</i> | EBNA1 binding protein 2                                                                                   | 10969 | Chr:19p35-p33     | 1.651  | 25 | 1.481   |
| M31932_at   | 37688_f_at | <i>FCGR2A</i>   | Fc fragment of IgG, low affinity Ila, receptor for (CD32)                                                 | 2212  | Chr:11q23         | 1.7186 | 17 | 1.0455  |
| M55593_at   | 39007_at   | <i>MMP2</i>     | matrix metalloproteinase 2 (gelatinase A, 72kDa gelatinase, 72kDa type IV collagenase)                    | 4313  | Chr:16q13-q21     | 1.579  | NA | NA      |
| U59877_s_at | 33372_at   | <i>RAB31</i>    | RAB31, member RAS oncogene family                                                                         | 11031 | Chr:18p11.3       | 1.5646 | 26 | 2.0064  |
| D38076_at   | 41342_at   | <i>RANBP1</i>   | RAN binding protein 1                                                                                     | 5902  | Chr:22q11.21      | 1.5567 | NA | NA      |
| D78151_at   | 1166_at    | <i>PSMD2</i>    | proteasome (prosome, macropain) 26S subunit, non-ATPase, 2                                                | 5708  | Chr:3q27.3        | 1.5706 | 25 | 1.6407  |
| U16261_at   | 41848_f_at | <i>IL24</i>     | interleukin 24                                                                                            | 11009 | Chr:1q32          | 1.5598 | 21 | 1.1458  |
| U60206_s_at | 32142_at   | <i>STK3</i>     | serine/threonine kinase 3 (STE20 homolog, yeast)                                                          | 6788  | Chr:8q22.1        | 1.542  | 26 | 1.5155  |
| D86960_at   | 34387_at   | <i>KIAA0205</i> | KIAA0205 gene product                                                                                     | 9926  | Chr:1p36.13-q42.3 | 1.5661 | NA | NA      |
| M34057_at   | 1495_at    | <i>LTPB1</i>    | latent transforming growth factor beta binding protein 1                                                  | 4052  | Chr:2p22-p21      | 1.5426 | 25 | 1.6426  |
| L19872_at   | 40516_at   | <i>AHR</i>      | aryl hydrocarbon receptor                                                                                 | 196   | Chr:7p15          | 1.5412 | NA | NA      |
| X06323_at   | 37726_at   | <i>MRPL3</i>    | mitochondrial ribosomal protein L3                                                                        | 11222 | Chr:3q21-q23      | 1.5708 | 24 | 1.4401  |
| X17620_at   | 39073_at   | <i>NME1</i>     | non-metastatic cells 1, protein (NM23A) expressed in                                                      | 4830  | Chr:17q21.3       | 1.5485 | 24 | 1.4482  |
| M97936_s_at | 32859_at   | <i>STAT1</i>    | signal transducer and activator of transcription 1, 91kDa                                                 | 6772  | Chr:2q32.2        | 1.5615 | 26 | 1.5338  |
| M31642_at   | 37640_at   | <i>HPRT1</i>    | hypoxanthine phosphoribosyltransferase 1 (Lesch-Nyhan syndrome)                                           | 3251  | Chr:Xq26.1        | 1.5136 | 25 | 1.5802  |
| D26600_at   | 33154_at   | <i>PSMB4</i>    | proteasome (prosome, macropain) subunit, beta type, 4                                                     | 5692  | Chr:1q21          | 1.5079 | 25 | 1.4458  |
| U17989_at   | 40901_at   | <i>STRN3</i>    | striatin, calmodulin binding protein 3                                                                    | 29966 | Chr:14q13-q21     | 1.5093 | 22 | 1.4537  |
| U33286_at   | 38804_at   | <i>CSE1L</i>    | CSE1 chromosome segregation 1-like (yeast)                                                                | 1434  | Chr:20q13         | 1.5009 | 24 | 1.3981  |
| X56468_at   | 409_at     | <i>YWHAQ</i>    | tyrosine 3-monooxygenase/tryptophan 5-monooxygenase activation protein, theta polypeptide                 | 10971 | Chr:2p25.1        | 1.478  | 26 | 1.3921  |
| U60805_at   | 39277_at   | <i>OSMR</i>     | oncostatin M receptor                                                                                     | 9180  | Chr:5p13.1        | 1.4751 | 19 | 1.479   |
| D11094_at   | 35353_at   | <i>PSMC2</i>    | proteasome (prosome, macropain) 26S subunit, ATPase, 2                                                    | 5701  | Chr:7q22.1-q22.3  | 1.4712 | 24 | 1.4218  |
| U42390_at   | 40581_at   | <i>TRIO</i>     | triple functional domain (PTPRF interacting)                                                              | 7204  | Chr:5p15.1-p14    | 1.4426 | 25 | 1.5634  |
| D26600_at   | 1311_at    | <i>PSMB4</i>    | proteasome (prosome, macropain) subunit, beta type, 4                                                     | 5692  | Chr:1q21          | 1.4429 | 25 | 1.4458  |
| AF000430_at | 357_at     | <i>DNM1L</i>    | dynamitin 1-like                                                                                          | 10059 | Chr:12p11.1       | 1.4693 | NA | NA      |
| X05682_at   | 37948_at   | <i>ATP6V1C1</i> | ATPase, H+ transporting, lysosomal 42kDa, V1 subunit C, isoform 1                                         | 528   | Chr:8q22.3        | 1.4028 | 27 | 1.5513  |
| X17620_s_at | 1905_s_at  | <i>NME1</i>     | non-metastatic cells 1, protein (NM23A) expressed in                                                      | 4830  | Chr:17q21.3       | 1.5485 | 24 | 1.4482  |
| U81554_at   | 31670_s_at | <i>SRF72</i>    | signal recognition particle 72kDa                                                                         | 6731  | Chr:4q11          | 1.4109 | 19 | 1.2114  |
| U84444_at   | 811_at     | <i>UFD1L</i>    | ubiquitin fusion degradation 1-like                                                                       | 7353  | Chr:22q11.21      | 1.3985 | 26 | 1.4553  |
| U31383_at   | 37735_at   | <i>GNG10</i>    | guanine nucleotide binding protein (G protein), gamma 10                                                  | 2790  | Chr:9q32          | 1.3907 | 20 | 1.3293  |
| L33801_at   | 1253_at    | <i>GSK3B</i>    | glycogen synthase kinase 3 beta                                                                           | 2932  | Chr:3q13.3        | 1.3826 | 23 | 1.4033  |
| J03827_at   | 36140_at   | <i>NSEP1</i>    | nuclease sensitive element binding protein 1                                                              | 4904  | Chr:1p34          | 1.4004 | NA | NA      |
| U53204_at   | 38021_at   | <i>PLEC1</i>    | plectin 1, intermediate filament binding protein 500kDa                                                   | 5339  | Chr:8q24          | 1.3797 | 24 | 1.4267  |
| U65410_at   | 1721_q_at  | <i>MAD2L1</i>   | MAD2 mitotic arrest deficient-like 1 (yeast)                                                              | 4085  | Chr:4q27          | 1.3969 | 25 | 2.1371  |
| S59184_at   | 539_at     | <i>RYK</i>      | RYK receptor-like tyrosine kinase                                                                         | 6259  | Chr:3q22          | 1.3867 | NA | NA      |
| D26598_at   | 1309_at    | <i>PSMB3</i>    | proteasome (prosome, macropain) subunit, beta type, 3                                                     | 5691  | Chr:17q12         | 1.4141 | 25 | 1.3731  |
| U35835_s_at | 2012_s_at  | <i>PRKDC</i>    | protein kinase, DNA-activated, catalytic polypeptide                                                      | 5591  | Chr:8q11          | 1.4018 | 24 | 1.571   |
| U04285_s_at | 38745_at   | <i>LIPA</i>     | lipase A, lysosomal acid, cholesterol esterase (Wolman disease)                                           | 3988  | Chr:10q23.2-q23.3 | 1.3925 | 27 | 1.1834  |
| Y10807_s_at | 32825_at   | <i>HRMT1L2</i>  | HMT1 histone H3 methyltransferase-like 2 (S. cerevisiae)                                                  | 3276  | Chr:19q13.3       | 1.3742 | 20 | 1.3299  |
| D64142_at   | 319_q_at   | <i>HIFX</i>     | H1 histone family, member X                                                                               | 8371  | ---               | 1.3389 | 25 | 1.4682  |
| X98263_at   | 31864_at   | <i>MPHOSPH6</i> | M-phase phosphoprotein 6                                                                                  | 10200 | Chr:16q23.2       | 1.3396 | 27 | 1.5771  |
| U78525_at   | 35323_at   | <i>EIF3S9</i>   | eukaryotic translation initiation factor 3, subunit 9 eta, 116kDa                                         | 8662  | Chr:7p22.3        | 1.3232 | 25 | 1.3529  |
| M88458_at   | 39080_at   | <i>KDELR2</i>   | KDEL (Lys-Asp-Glu-Leu) endoplasmic reticulum protein retention receptor 2                                 | 11014 | Chr:7p22.2        | 1.3619 | NA | NA      |
| D78361_at   | 1315_at    | <i>OAZ1</i>     | ornithine decarboxylase antizyme 1                                                                        | 4946  | Chr:19p13.3       | 1.347  | 26 | 1.3004  |
| D21337_at   | 39939_at   | <i>COL4A6</i>   | collagen, type IV, alpha 6                                                                                | 1288  | Chr:Xq22          | 1.3028 | 23 | 1.3185  |
| X97064_at   | 39099_at   | <i>SEC23A</i>   | Sec23 homolog A (S. cerevisiae)                                                                           | 10484 | Chr:14q13.2       | 1.3081 | NA | NA      |
| L06175_at   | 33320_at   | <i>P5-1</i>     | MHC class I region ORF                                                                                    | 10866 | Chr:6p21.3        | 1.2949 | 19 | 1.1299  |
| X51688_at   | 40697_at   | <i>CCNA2</i>    | cyclin A2                                                                                                 | 890   | Chr:4q25-q31      | 1.2942 | 26 | 1.4332  |
| U45328_s_at | 38480_s_at | <i>UBE2I</i>    | ubiquitin-conjugating enzyme E2I (UBC9 homolog, yeast)                                                    | 7329  | Chr:16p13.3       | 1.2906 | 26 | 1.252   |
| J04430_s_at | 677_s_at   | <i>ACPF5</i>    | acid phosphatase 5, tartrate resistant                                                                    | 54    | Chr:19p13.3-p13.2 | 1.2819 | NA | NA      |
| M59911_at   | 885_q_at   | <i>ITGA3</i>    | integrin, alpha 3 (antigen CD49c, alpha 3 subunit of VLA-3 receptor)                                      | 3675  | Chr:17q21.32      | 1.2822 | 26 | 1.4621  |
| L35240_at   | 39530_at   | <i>ENIGMA</i>   | enigma (LIM domain protein)                                                                               | 9260  | Chr:5q35.3        | 1.2714 | 21 | 1.3146  |
| U07077_at   | 2012_s_at  | <i>PRKDC</i>    | protein kinase, DNA-activated, catalytic polypeptide                                                      | 5591  | Chr:8q11          | 1.297  | 24 | 1.571   |
| U69611_at   | 1227_q_at  | <i>ADAM17</i>   | a disintegrin and metalloproteinase domain 17 (tumor necrosis factor, alpha, converting enzyme)           | 6868  | Chr:2p25          | 1.2606 | 21 | 1.2626  |
| X97074_at   | 39347_at   | <i>AP2S1</i>    | adaptor-related protein complex 2, sigma 1 subunit                                                        | 1175  | Chr:19q13.2-q13.3 | 1.2855 | 21 | 1.1975  |
| M14949_at   | 1879_at    | <i>RRAS</i>     | related RAS viral (r-ras) oncogene homolog                                                                | 6237  | Chr:19q13.3-qter  | 1.2525 | 20 | 1.1319  |
| U41668_at   | 37335_at   | <i>DGUOK</i>    | deoxyguanosine kinase                                                                                     | 1716  | Chr:2p13          | 1.2432 | 20 | 1.1813  |
| M25077_at   | 35293_at   | <i>SSA2</i>     | Sjogren syndrome antigen A2 (60kDa, ribonucleoprotein autoantigen SS-A/Ro)                                | 6738  | Chr:1q31          | 1.2399 | 17 | 1.058   |
| X60787_s_at | 40476_s_at | <i>ILF1</i>     | interleukin enhancer binding factor 1                                                                     | 3607  | Chr:17q25         | 1.2267 | 23 | 1.1932  |
| D64154_at   | 38808_at   | <i>ADRM1</i>    | adhesion regulating molecule 1                                                                            | 11047 | Chr:20q13.33      | 1.235  | 24 | 1.3068  |
| U72882_s_at | 464_s_at   | <i>IFI35</i>    | interferon-induced protein 35                                                                             | 3430  | Chr:17q21         | 1.2364 | NA | NA      |
| X74819_at   | 38793_at   | <i>TINT2</i>    | troponin T2, cardiac                                                                                      | 7139  | Chr:1q32          | 1.2224 | 9  | 0.94329 |
| U37012_at   | 33132_at   | <i>CPSF1</i>    | cleavage and polyadenylation specific factor 1, 160kDa                                                    | 29894 | Chr:8q24.23       | 1.2124 | 24 | 1.2543  |
| U73379_at   | 1651_at    | <i>UBE2C</i>    | ubiquitin-conjugating enzyme E2C                                                                          | 11065 | Chr:20q13.11      | 1.1905 | NA | NA      |
| L35240_at   | 39529_at   | <i>ENIGMA</i>   | enigma (LIM domain protein)                                                                               | 9260  | Chr:5q35.3        | 1.1777 | 21 | 1.3146  |
| M06026_at   | 36919_r_at | <i>FRP1</i>     | formyl peptide receptor 1                                                                                 | 2357  | Chr:19q13.4       | 1.1703 | NA | NA      |
| X79353_at   | 36152_at   | <i>GDI1</i>     | GDP dissociation inhibitor 1                                                                              | 2664  | Chr:Xq28          | 1.1713 | NA | NA      |
| X57110_s_at | 34416_at   | <i>CBL</i>      | Cas-Br-M (murine) ecotropic retroviral transforming sequence                                              | 867   | Chr:11q23.3       | 1.1685 | 9  | 0.95751 |
| U41804_at   | 36461_at   | <i>IL1RL1LG</i> | putative T1/ST2 receptor binding protein                                                                  | 11018 | Chr:19p13.2       | 1.1624 | 15 | 1.0547  |

### Genes with P < N in 28/28 Cases, Full Model

Hu8000 Probe Set U95Av2 Probe Set Gene Symbol Title LocusLink Location Avg Negative Fold Change #P<N Pseudo-Probe Set Avg Negative Fold Change Pseudo-probe Sets

|             |            |                 |                                                               |       |                 |         |    |          |
|-------------|------------|-----------------|---------------------------------------------------------------|-------|-----------------|---------|----|----------|
| X07695_at   | 39657_at   | <i>KRT4</i>     | keratin 4                                                     | 3851  | Chr:12q12-q13   | -12.699 | 28 | -18.2803 |
| X67683_at   | 39657_at   | <i>KRT4</i>     | keratin 4                                                     | 3851  | Chr:12q12-q13   | -10.805 | 28 | -18.2803 |
| X95240_s_at | 36464_at   | <i>SGP28</i>    | specific granule protein (28 kDa)                             | 10321 | Chr:6p12.3      | -10.073 | NA | NA       |
| M84526_at   | 40282_s_at | <i>DF</i>       | D component of complement (adipin)                            | 1675  | Chr:19p13.3     | -3.262  | 28 | -4.6954  |
| X76732_at   | 35643_at   | <i>NUCB2</i>    | nucleobindin 2                                                | 4925  | Chr:11p15.1-p14 | -2.8104 | 28 | -3.3028  |
| L76465_at   | 32570_at   | <i>HPGD</i>     | hydroxyprostaglandin dehydrogenase 15-(NAD)                   | 3248  | Chr:4q34-q35    | -2.5916 | 28 | -2.9512  |
| AF001620_at | 40403_at   | <i>MYOC</i>     | myosin, trabecular meshwork inducible glucocorticoid response | 4653  | Chr:12p23-q24   | -2.0607 | 28 | -2.7446  |
| D67445_at   | 41634_at   | <i>KIAA0256</i> | KIAA0256 gene product                                         | 9728  | Chr:15q15.2     | -1.4763 | 27 | -1.7242  |
| U24488_s_at | 38508_s_at | <i>TNXB</i>     | tenascin XB                                                   | 7148  | Chr:6p21.3      | -1.445  | 28 | -1.9714  |
| X14329_at   | 39593_at   | <i>CPN1</i>     | carboxypeptidase N, polypeptide 1, 50kD                       | 1369  | Chr:10q24.2     | -1.4302 | 25 | -1.1961  |
| D79998_at   | 34858_at   | <i>KIAA0176</i> | KIAA0176 protein                                              | 23510 | Chr:17q25.2     | -1.2946 | 19 | -1.0949  |

### Genes with P < N in 27/28 Cases, Full Model

| Hu6800 Probe Set | U95Av2 Probe Set | Gene Symbol     | Title                                                                            | LocusLink | Location          | Avg Negative Fold Change | #P<N Pseudo-Probe Set | Avg Negative Fold Change Pseudo-probe Sets |
|------------------|------------------|-----------------|----------------------------------------------------------------------------------|-----------|-------------------|--------------------------|-----------------------|--------------------------------------------|
| X76223_s_at      | 38051_at         | <i>MAL</i>      | mal, T-cell differentiation protein                                              | 4118      | Chr:2cen-q13      | -11.229                  | 27                    | -16.7368                                   |
| X52426_s_at      | 36883_at         | <i>KRT13</i>    | keratin 13                                                                       | 3860      | Chr:17q12-q21.2   | -6.6029                  | 27                    | -5.8841                                    |
| Y07909_at        | 37762_at         | <i>EMP1</i>     | epithelial membrane protein 1                                                    | 2012      | Chr:12p12.3       | -4.6598                  | 27                    | -7.4031                                    |
| U43916_s_at      | 37762_at         | <i>EMP1</i>     | epithelial membrane protein 1                                                    | 2012      | Chr:12p12.3       | -4.5392                  | 27                    | -7.4031                                    |
| X76342_at        | 33529_at         | <i>ADH7</i>     | alcohol dehydrogenase 7 (class IV), mu or sigma polypeptide                      | 131       | Chr:4q23-q24      | -4.2338                  | 27                    | -4.8165                                    |
| X53296_s_at      | 37603_at         | <i>IL1RN</i>    | interleukin 1 receptor antagonist                                                | 3557      | Chr:2q14.2        | -3.9642                  | 27                    | -4.8437                                    |
| U65932_at        | 37600_at         | <i>ECM1</i>     | extracellular matrix protein 1                                                   | 1893      | Chr:1q21          | -3.36                    | 26                    | -4.6411                                    |
| U67963_at        | 35792_at         | <i>MGLL</i>     | monoglyceride lipase                                                             | 11343     | Chr:3q21.3        | -3.1028                  | 28                    | -3.0406                                    |
| Y07909_at        | 1321_s_at        | <i>EMP1</i>     | epithelial membrane protein 1                                                    | 2012      | Chr:12p12.3       | -3.045                   | 27                    | -7.4031                                    |
| U43916_s_at      | 1321_s_at        | <i>EMP1</i>     | epithelial membrane protein 1                                                    | 2012      | Chr:12p12.3       | -2.9662                  | 27                    | -7.4031                                    |
| X16354_at        | 988_at           | <i>CEACAM1</i>  | carcinoembryonic antigen-related cell adhesion molecule 1 (biliary glycoprotein) | 634       | Chr:19q13.2       | -2.5674                  | NA                    | NA                                         |
| L76465_at        | 37322_s_at       | <i>HPGD</i>     | hydroxyprostaglandin dehydrogenase 15-(NAD)                                      | 3248      | Chr:4q34-q35      | -2.5305                  | 28                    | -2.9512                                    |
| U19495_s_at      | 32666_at         | ---             | Intercrine-alpha, mRNA sequence                                                  | ---       | ---               | -2.3409                  | ---                   | ---                                        |
| X03350_at        | 35730_at         | <i>ADH1B</i>    | alcohol dehydrogenase IB (class I), beta polypeptide                             | 125       | Chr:4q21-q23      | -2.1126                  | 27                    | -2.5948                                    |
| X64559_at        | 36569_at         | <i>TNA</i>      | tetranectin (plasminogen binding protein)                                        | 7123      | Chr:3p22-p21.3    | -2.0912                  | 27                    | -2.8094                                    |
| X95826_at        | 34952_at         | <i>DO</i>       | Dombrock blood group                                                             | 420       | Chr:12q13.2-q13.3 | -2.0393                  | 18                    | -1.0783                                    |
| L40379_at        | 36116_at         | <i>TRIP10</i>   | thyroid hormone receptor interactor 10                                           | 9322      | Chr:19p13.3       | -1.8874                  | 27                    | -1.8904                                    |
| L76465_at        | 37323_r_at       | <i>HPGD</i>     | hydroxyprostaglandin dehydrogenase 15-(NAD)                                      | 3248      | Chr:4q34-q35      | -1.7509                  | 28                    | -2.9512                                    |
| X68985_s_at      | 871_s_at         | <i>HLF</i>      | hepatic leukemia factor                                                          | 3131      | Chr:17q22         | -1.7118                  | NA                    | NA                                         |
| S73591_at        | 31508_at         | <i>TXNP</i>     | thioredoxin interacting protein                                                  | 10628     | Chr:1q21.1        | -1.731                   | 26                    | -1.8998                                    |
| L19605_at        | 36637_at         | <i>ANXA11</i>   | annexin A11                                                                      | 311       | Chr:10q23         | -1.6991                  | 28                    | -1.9847                                    |
| U70063_at        | 36938_at         | <i>ASAH1</i>    | N-acylsphingosine amidohydrolase (acid ceramidase) 1                             | 427       | Chr:8q22-p21.3    | -1.6917                  | 27                    | -1.4685                                    |
| Y09616_at        | 40882_at         | <i>CES2</i>     | carboxylesterase 2 (intestine, liver)                                            | 8624      | Chr:16p21         | -1.5173                  | NA                    | NA                                         |
| D83407_at        | 32076_at         | <i>DSCR1L1</i>  | Down syndrome critical region gene 1-like 1                                      | 10231     | Chr:6p12.3        | -1.5182                  | 28                    | -1.7327                                    |
| U12778_at        | 40673_at         | <i>ACADSB</i>   | acyl-Coenzyme A dehydrogenase, short/branched chain                              | 36        | Chr:10q25-q26     | -1.4601                  | 26                    | -1.6175                                    |
| U77604_at        | 820_at           | <i>MGST2</i>    | microsomal glutathione S-transferase 2                                           | 4258      | Chr:4q28.3        | -1.4343                  | 26                    | -1.8604                                    |
| X75252_at        | 32611_at         | <i>PBP</i>      | prostatic binding protein                                                        | 5037      | Chr:12q24.23      | -1.404                   | 26                    | -1.8026                                    |
| U73514_at        | 40778_at         | <i>HADH2</i>    | hydroxyacyl-Coenzyme A dehydrogenase, type II                                    | 3028      | Chr:Xp11.2        | -1.383                   | 22                    | -1.3057                                    |
| U43965_at        | 36966_at         | <i>ANK3</i>     | ankyrin 3, node of Ranvier (ankyrin G)                                           | 288       | Chr:10q21         | -1.3264                  | 22                    | -1.346                                     |
| U38904_at        | 38142_at         | <i>ZNF211</i>   | zinc finger protein 211                                                          | 10520     | Chr:19q13.4       | -1.3147                  | 21                    | -1.1598                                    |
| U10868_at        | 40685_at         | <i>ALDH3B1</i>  | aldehyde dehydrogenase 3 family, member B1                                       | 221       | Chr:11q13         | -1.2762                  | 24                    | -1.3491                                    |
| M13666_at        | 1471_at          | <i>MYB</i>      | v-myb myeloblastosis viral oncogene homolog (avian)                              | 4602      | Chr:6q22-q23      | -1.2725                  | NA                    | NA                                         |
| U53003_at        | 41749_at         | <i>C21orf33</i> | chromosome 21 open reading frame 33                                              | 8209      | Chr:21q22.3       | -1.2431                  | 28                    | -1.4987                                    |

### Genes with P < N in 26/28 Cases, Full Model

| Hu6800 Probe Set | U95Av2 Probe Set | Gene Symbol     | Title                                                                                                    | LocusLink | Location       | Avg Negative Fold Change | #P<N Pseudo-Probe Set | Avg Negative Fold Change Pseudo-probe Sets |
|------------------|------------------|-----------------|----------------------------------------------------------------------------------------------------------|-----------|----------------|--------------------------|-----------------------|--------------------------------------------|
| AB001325_at      | 39248_at         | <i>AQP3</i>     | aquaporin 3                                                                                              | 360       | Chr:9p13       | -3.1335                  | 25                    | -2.8074                                    |
| U17077_at        | 33331_at         | <i>BENE</i>     | BENE protein                                                                                             | 7651      | Chr:2q13       | -2.9714                  | 26                    | -2.9714                                    |
| L33930_s_at      | 266_at           | <i>CD24</i>     | CD24 antigen (small cell lung carcinoma cluster 4 antigen)                                               | 934       | Chr:6p21       | -2.2693                  | 27                    | -2.1194                                    |
| D80010_at        | 38098_at         | <i>LPIN1</i>    | lipin 1                                                                                                  | 23175     | Chr:2p25.1     | -2.2006                  | 28                    | -3.105                                     |
| M62982_at        | 35124_at         | <i>ALOX12</i>   | arachidonate 12-lipoxygenase                                                                             | 239       | Chr:17p13.1    | -2.179                   | 25                    | -1.9416                                    |
| U27333_s_at      | 36290_s_at       | <i>FUT6</i>     | fucosyltransferase 6 (alpha (1,3) fucosyltransferase)                                                    | 2528      | Chr:19p13.3    | -1.866                   | NA                    | NA                                         |
| X16354_at        | 36082_at         | <i>CEACAM1</i>  | carcinoembryonic antigen-related cell adhesion molecule 1 (biliary glycoprotein)                         | 634       | Chr:19q13.2    | -1.8433                  | NA                    | NA                                         |
| U27333_s_at      | 36289_f_at       | <i>FUT6</i>     | fucosyltransferase 6 (alpha (1,3) fucosyltransferase)                                                    | 2528      | Chr:19p13.3    | -1.7541                  | NA                    | NA                                         |
| U53786_at        | 39569_at         | <i>EVPL</i>     | envoplakin                                                                                               | 2125      | Chr:17q25      | -1.7956                  | 26                    | -1.6043                                    |
| U09770_at        | 33232_at         | <i>CRIP1</i>    | cysteine-rich protein 1 (intestinal)                                                                     | 1396      | Chr:7q11.23    | -1.774                   | NA                    | NA                                         |
| L11695_at        | 32903_at         | <i>TGFBFR1</i>  | transforming growth factor, beta receptor I (activin A receptor type II-like kinase, 53kDa)              | 7046      | Chr:9q22       | -1.7141                  | 16                    | -1.0218                                    |
| U70063_at        | 461_at           | <i>ASAH1</i>    | N-acylsphingosine amidohydrolase (acid ceramidase) 1                                                     | 427       | Chr:8p22-p21.3 | -1.7478                  | 27                    | -1.4685                                    |
| X60489_at        | 35748_at         | <i>EEF1B2</i>   | eukaryotic translation elongation factor 1 beta 2                                                        | 1933      | Chr:2q33-q34   | -1.71                    | 27                    | -1.8498                                    |
| D00408_s_at      | 1759_f_at        | <i>CYP3A7</i>   | cytochrome P450, subfamily IIIA, polypeptide 7                                                           | 1551      | Chr:7q21-q22.1 | -1.6276                  | 14                    | -1.0237                                    |
| U82468_at        | 34030_at         | <i>TULP1</i>    | tubby like protein 1                                                                                     | 7287      | Chr:6p21.3     | -1.5029                  | 25                    | -1.2997                                    |
| M81182_s_at      | 37038_at         | <i>ABCD3</i>    | ATP-binding cassette, sub-family D (ALD), member 3                                                       | 5825      | Chr:1p22-p21   | -1.5049                  | 27                    | -1.8147                                    |
| L11695_at        | 1957_s_at        | <i>TGFBFR1</i>  | transforming growth factor, beta receptor I (activin A receptor type II-like kinase, 53kDa)              | 7046      | Chr:9q22       | -1.4582                  | 16                    | -1.0218                                    |
| J03507_at        | 37394_at         | <i>C7</i>       | complement component 7                                                                                   | 730       | Chr:5p13       | -1.436                   | 27                    | -1.626                                     |
| J05412_at        | 38646_s_at       | <i>REG1A</i>    | regenerating islet-derived 1 alpha (pancreatic stone protein, pancreatic thread protein)                 | 5967      | Chr:2p12       | -1.4567                  | 20                    | -1.1049                                    |
| D86985_at        | 37748_at         | <i>KIAA0232</i> | KIAA0232 gene product                                                                                    | 9778      | Chr:4p16.1     | -1.4441                  | 26                    | -1.7236                                    |
| D37931_at        | 32664_at         | <i>RNASE4</i>   | ribonuclease, RNase A family, 4                                                                          | 6038      | Chr:14q11.1    | -1.4368                  | NA                    | NA                                         |
| M80899_at        | 37027_at         | <i>AHNAK</i>    | AHNAK nucleoprotein (desmoyokin)                                                                         | 195       | Chr:11q12-q13  | -1.4362                  | NA                    | NA                                         |
| U85707_at        | 40763_at         | <i>MEIS1</i>    | Meis1, myeloid ecotropic viral integration site 1 homolog (mouse)                                        | 4211      | Chr:2p14-p13   | -1.4252                  | 24                    | -1.5573                                    |
| Y09267_at        | 34935_at         | <i>FMO2</i>     | flavin containing monooxygenase 2                                                                        | 2327      | Chr:1q23-q25   | -1.3983                  | NA                    | NA                                         |
| X58528_s_at      | 37038_at         | <i>ABCD3</i>    | ATP-binding cassette, sub-family D (ALD), member 3                                                       | 5825      | Chr:1p22-p21   | -1.3846                  | 27                    | -1.8147                                    |
| U15932_at        | 529_at           | <i>DUSP6</i>    | dual specificity phosphatase 5                                                                           | 1847      | Chr:10q25      | -1.3587                  | 24                    | -2.0748                                    |
| Z19002_at        | 39681_at         | <i>ZNF145</i>   | zinc finger protein 145 (Kruppel-like, expressed in promyelocytic leukemia)                              | 7704      | Chr:11q23.1    | -1.3431                  | NA                    | NA                                         |
| D11327_s_at      | 1760_s_at        | <i>PTPN7</i>    | protein tyrosine phosphatase, non-receptor type 7                                                        | 5778      | Chr:1q32.1     | -1.3081                  | NA                    | NA                                         |
| U16258_at        | 530_at           | ---             | I kappa BR, mRNA sequence                                                                                | ---       | ---            | -1.3437                  | ---                   | ---                                        |
| U90336_at        | 39701_at         | <i>PEG3</i>     | paternally expressed 3                                                                                   | 5178      | Chr:19q13.4    | -1.2826                  | 23                    | NA                                         |
| S77154_s_at      | 547_s_at         | <i>NR4A2</i>    | nuclear receptor subfamily 4, group A, member 2                                                          | 4929      | Chr:2q22-q23   | -1.2625                  | NA                    | -1.8028                                    |
| S77812_at        | 1567_at          | <i>FLT1</i>     | fms-related tyrosine kinase 1 (vascular endothelial growth factor/vascular permeability factor receptor) | 2321      | Chr:13q12      | -1.2376                  | NA                    | NA                                         |
| J02947_s_at      | 692_s_at         | <i>SOD3</i>     | superoxide dismutase 3, extracellular                                                                    | 6649      | Chr:4p16.3-q21 | -1.2317                  | 23                    | -1.2888                                    |
| S38953_s_at      | 38508_s_at       | <i>TNXB</i>     | tenascin XB                                                                                              | 7148      | Chr:6p21.3     | -1.2451                  | 28                    | -1.9714                                    |
| U90902_at        | 38370_at         | ---             | Human clone 23612 mRNA sequence                                                                          | ---       | ---            | -1.2365                  | ---                   | ---                                        |
| D43682_s_at      | 38376_at         | <i>ACADVL</i>   | acyl-Coenzyme A dehydrogenase, very long chain                                                           | 37        | Chr:17p13-p11  | -1.2031                  | 28                    | -1.455                                     |
| D86984_at        | 33771_at         | <i>TA-LRRP</i>  | T-cell activation leucine repeat-rich protein                                                            | 23507     | Chr:1p22.1     | -1.2058                  | NA                    | NA                                         |
| D86062_s_at      | 41749_at         | <i>C21orf33</i> | chromosome 21 open reading frame 33                                                                      | 8209      | Chr:21q22.3    | -1.1941                  | 28                    | -1.4987                                    |

|           |          |       |                                                                                                |      |             |         |    |    |
|-----------|----------|-------|------------------------------------------------------------------------------------------------|------|-------------|---------|----|----|
| D84307_at | 34261_at | PCYT2 | phosphate cytidyltransferase 2, ethanolamine                                                   | 5833 | Chr:17q25.3 | -1.1568 | NA | NA |
| M57732_at | 34639_at | TCF1  | transcription factor 1, hepatic; LF-B1, hepatic nuclear factor (HNF1), albumin proximal factor | 6927 | Chr:12q24.2 | -1.1374 | NA | NA |

### Genes with P < N in 25/28 Cases, Full Model

| Hu6800 Probe Set | U95Av2 Probe Set | Gene Symbol | Title                                                                                                                    | LocusLink | Location            | Avg Negative Fold Change | #P<N Pseudo-Probe Set | Avg Negative Fold Change Pseudo-probe Sets |
|------------------|------------------|-------------|--------------------------------------------------------------------------------------------------------------------------|-----------|---------------------|--------------------------|-----------------------|--------------------------------------------|
| L10386_at        | 32868_at         | TGM3        | transglutaminase 3 (E polypeptide, protein-glutamine-gamma-glutamyltransferase)                                          | 7053      | Chr:20q11.2         | -6.2866                  | 26                    | -13.3232                                   |
| M74542_at        | 40031_at         | ALDH3A1     | aldehyde dehydrogenase 3 family, member A1                                                                               | 218       | Chr:17p11.2         | -4.1343                  | 25                    | -4.2571                                    |
| M93056_at        | 33305_at         | SERPINB1    | serine (or cysteine) proteinase inhibitor, clade B (ovalbumin), member 1                                                 | 1992      | Chr:6p25            | -3.3278                  | 25                    | -3.1774                                    |
| AB001325_at      | 39249_at         | AQP3        | aquaporin 3                                                                                                              | 360       | Chr:9p13            | -2.9073                  | 25                    | -2.8074                                    |
| U70370_at        | 37920_at         | PITX1       | paired-like homeodomain transcription factor 1                                                                           | 5307      | Chr:5q31            | -2.8179                  | 27                    | -2.7906                                    |
| X53296_s_at      | 31343_at         | IL1RN       | interleukin 1 receptor antagonist                                                                                        | 3557      | Chr:2q14.2          | -2.7458                  | 27                    | -4.8437                                    |
| U92314_s_at      | 41034_s_at       | SUL2T81     | sulfotransferase family, cytosolic, 2B, member 1                                                                         | 6820      | Chr:19q13.3         | -2.4249                  | 26                    | -2.1498                                    |
| M98539_at        | 216_at           | PTGDS       | prostaglandin D2 synthase 21kDa (brain)                                                                                  | 5730      | Chr:9q34.2-q34.3    | -2.4632                  | 25                    | -1.7224                                    |
| D86980_at        | 37533_r_at       | KIAA0227    | KIAA0227 protein                                                                                                         | 23508     | Chr:14q24.1         | -2.2833                  | 28                    | -2.3136                                    |
| X05908_at        | 37403_at         | ANXA1       | annexin A1                                                                                                               | 301       | Chr:9q12-q21.2      | -2.2689                  | 25                    | -2.1666                                    |
| U71207_at        | 35226_at         | EYA2        | eyes absent homolog 2 (Drosophila)                                                                                       | 2139      | Chr:20q13.1         | -2.162                   | 27                    | -1.6457                                    |
| X04412_at        | 32612_at         | GSN         | gelsolin (amyloidosis, Finnish type)                                                                                     | 2934      | Chr:9q33            | -2.0739                  | NA                    | NA                                         |
| M98539_at        | 38406_f_at       | PTGDS       | prostaglandin D2 synthase 21kDa (brain)                                                                                  | 5730      | Chr:9q34.2-q34.3    | -2.1128                  | 25                    | -1.7224                                    |
| L15296_s_at      | 37071_at         | CNGB1       | cyclic nucleotide gated channel beta 1                                                                                   | 1258      | Chr:16q13           | -2.0954                  | 13                    | -0.85792                                   |
| U37519_at        | 37956_at         | ---         | Aldehyde dehydrogenase, mRNA sequence                                                                                    | ---       | ---                 | -2.0575                  | ---                   | ---                                        |
| D38524_at        | 31794_at         | NT5C2       | 5'-nucleotidase, cytosolic II                                                                                            | 22978     | Chr:10q24.32        | -1.9863                  | 26                    | -1.8296                                    |
| D38524_at        | 738_at           | NT5C2       | 5'-nucleotidase, cytosolic II                                                                                            | 22978     | Chr:10q24.32        | -1.9699                  | 26                    | -1.8296                                    |
| U47414_at        | 1913_at          | CCNG2       | cyclin G2                                                                                                                | 901       | Chr:4q21.21         | -1.9159                  | 25                    | -1.9639                                    |
| D10687_s_at      | 37407_s_at       | MYH11       | myosin, heavy polypeptide 11, smooth muscle                                                                              | 4629      | Chr:16p13.13-p13.12 | -1.9147                  | 26                    | -2.2701                                    |
| U53506_at        | 31902_at         | DIO2        | deiodinase, iodothyronine, type II                                                                                       | 1734      | Chr:14q24.2-q24.3   | -1.9581                  | NA                    | NA                                         |
| AF000231_at      | 36660_at         | RAB11A      | RAB11A, member RAS oncogene family                                                                                       | 8766      | Chr:15q21.3-q22.31  | -1.8327                  | 25                    | -1.9836                                    |
| U66497_at        | 34267_r_at       | LEPR        | leptin receptor                                                                                                          | 3953      | Chr:1p31            | -1.7041                  | NA                    | NA                                         |
| L19593_at        | 664_at           | IL8RB       | interleukin 8 receptor, beta                                                                                             | 3579      | Chr:2q35            | -1.7884                  | 25                    | -1.2228                                    |
| U10485_at        | 35974_at         | LRMP        | lymphoid-restricted membrane protein                                                                                     | 4033      | Chr:12p12.1         | -1.7296                  | 24                    | -2.0153                                    |
| D16217_at        | 41257_at         | CAST        | calpastatin                                                                                                              | 831       | Chr:5q15-q21        | -1.7941                  | NA                    | NA                                         |
| X76180_at        | 35207_at         | DC12        | DC12 protein                                                                                                             | 56941     | Chr:3               | -1.7063                  | NA                    | NA                                         |
| U69546_at        | 32851_at         | CUGBP2      | CUG triplet repeat, RNA binding protein 2                                                                                | 10659     | Chr:10p13           | -1.7676                  | NA                    | NA                                         |
| U41740_at        | 32150_at         | GOLGA4      | golgi autoantigen, golgin subfamily a, 4                                                                                 | 2803      | Chr:3p22-p21.3      | -1.7275                  | NA                    | NA                                         |
| U91903_at        | 40230_at         | FRZB        | frizzled-related protein                                                                                                 | 2487      | Chr:2qter           | -1.6521                  | NA                    | NA                                         |
| M16750_s_at      | 1779_s_at        | PIM1        | pim-1 oncogene                                                                                                           | 5292      | Chr:6p21.2          | -1.667                   | 24                    | -1.5863                                    |
| L08485_at        | 39321_at         | GABRA5      | gamma-aminobutyric acid (GABA) A receptor, alpha 5                                                                       | 2558      | Chr:15q11.2-q12     | -1.5597                  | NA                    | NA                                         |
| M98833_at        | 41425_at         | FLI1        | Friend leukemia virus integration 1                                                                                      | 2313      | Chr:11q24.1-q24.3   | -1.5928                  | 22                    | -1.1995                                    |
| D87292_at        | 36123_at         | TST         | thiosulfate sulfurtransferase (rhodanese)                                                                                | 7263      | Chr:22q13.1         | -1.5427                  | 23                    | -1.5826                                    |
| D87735_at        | 31907_at         | RPL14       | ribosomal protein L14                                                                                                    | 9045      | Chr:3p22-p21.2      | -1.5323                  | 27                    | -1.641                                     |
| X04325_at        | 39598_at         | GJB1        | gap junction protein, beta 1, 32kDa (connexin 32, Charcot-Marie-Tooth neuropathy, X-linked)                              | 2705      | Chr:Xq13.1          | -1.5177                  | 18                    | -1.0806                                    |
| U37221_at        | 33188_at         | PPIL2       | peptidylprolyl isomerase (cyclophilin)-like 2                                                                            | 23759     | Chr:22q11.21        | -1.5216                  | NA                    | NA                                         |
| J02843_at        | 40379_at         | CYP2E1      | cytochrome P450, subfamily IIE (ethanol-inducible), polypeptide 1                                                        | 1571      | Chr:10q24.3-qter    | -1.5029                  | 25                    | -1.6078                                    |
| U43965_at        | 36965_at         | ANK3        | ankyrin 3, node of Ranvier (ankyrin G)                                                                                   | 288       | Chr:10q21           | -1.5276                  | 22                    | -1.346                                     |
| U79253_at        | 40026_g_at       | ATPW        | mitochondrial ATP synthase regulatory component factor B                                                                 | 27109     | Chr:14q21.3         | -1.4991                  | 27                    | -1.2928                                    |
| U73843_at        | 40445_at         | ELF3        | E74-like factor 3 (ets domain transcription factor, epithelial-specific)                                                 | 1999      | Chr:1q32.2          | -1.4139                  | NA                    | NA                                         |
| X16323_at        | 1340_s_at        | HGF         | hepatocyte growth factor (hepatoietin A; scatter factor)                                                                 | 3082      | Chr:7q21.1          | -1.3997                  | NA                    | NA                                         |
| M97676_at        | 214_at           | MSX1        | msh homeo box homolog 1 (Drosophila)                                                                                     | 4487      | Chr:4p16.3-p16.1    | -1.3919                  | 21                    | -1.1512                                    |
| S69369_at        | 38900_at         | PAX3        | paired box gene 3 (Waardenburg syndrome 1)                                                                               | 5077      | Chr:2q35            | -1.3865                  | 20                    | -1.1813                                    |
| D14664_at        | 34760_at         | BIMLEC      | C-type lectin BIMLEC precursor                                                                                           | 9936      | Chr:2q24.2          | -1.3673                  | NA                    | NA                                         |
| D87452_at        | 36154_at         | IHPK1       | inositol hexaphosphate kinase 1                                                                                          | 9807      | Chr:3p21.31         | -1.3535                  | NA                    | NA                                         |
| S69272_s_at      | 34789_at         | SERPINB6    | serine (or cysteine) proteinase inhibitor, clade B (ovalbumin), member 6                                                 | 5269      | Chr:6p25            | -1.3109                  | 27                    | -1.5448                                    |
| U28368_at        | 41536_at         | ID4         | inhibitor of DNA binding 4, dominant negative helix-loop-helix protein                                                   | 3400      | Chr:6p22-p21        | -1.3092                  | NA                    | NA                                         |
| D86959_at        | 38669_at         | SLK         | Ste20-related serine/threonine kinase                                                                                    | 9748      | Chr:10q24.32        | -1.3451                  | NA                    | NA                                         |
| M10321_s_at      | 607_s_at         | VWF         | von Willebrand factor                                                                                                    | 7450      | Chr:12p13.3         | -1.3136                  | NA                    | NA                                         |
| X93498_at        | 36039_s_at       | SH3BGR      | SH3 domain binding glutamic acid-rich protein                                                                            | 6450      | Chr:21q22.3         | -1.3074                  | 22                    | -1.5067                                    |
| D90086_at        | 39160_at         | PDHb        | pyruvate dehydrogenase (liponamide) beta                                                                                 | 5162      | Chr:3p21.1-p14.2    | -1.3005                  | 26                    | -1.3592                                    |
| U09578_at        | 1637_at          | MAPKAPK3    | mitogen-activated protein kinase-activated protein kinase 3                                                              | 7867      | Chr:3p21.3          | -1.2987                  | 27                    | -1.4109                                    |
| M21624_at        | 38917_at         | TRD@        | T cell receptor delta locus                                                                                              | 6964      | Chr:14q11.2         | -1.2807                  | NA                    | NA                                         |
| M13577_at        | 35817_at         | MBP         | myelin basic protein                                                                                                     | 4155      | Chr:18q23           | -1.2831                  | NA                    | NA                                         |
| S81294_at        | 1349_at          | ---         | ---                                                                                                                      | ---       | ---                 | -1.2757                  | ---                   | ---                                        |
| M12963_s_at      | 34637_at         | ADH1A       | DCC [Homo sapiens], mRNA sequence                                                                                        | 124       | Chr:4q21-q23        | -1.2745                  | 27                    | -1.926                                     |
| D86096_cds3_at   | 32689_at         | PTGER3      | alcohol dehydrogenase 1A (class I), alpha polypeptide                                                                    | 5733      | Chr:1p31.2          | -1.2638                  | NA                    | NA                                         |
| U71364_at        | 34438_at         | SERPINB9    | serine (or cysteine) proteinase inhibitor, clade B (ovalbumin), member 9                                                 | 5272      | Chr:6p25            | -1.2498                  | 19                    | -1.1122                                    |
| U52840_at        | 35204_at         | SEMA5A      | sema domain, seven thrombospondin repeats (type 1 and type 1-like), transmembrane domain (TM) and short cytoplasm        | 9037      | Chr:5p15.2          | -1.2576                  | NA                    | NA                                         |
| M93718_at        | 1961_f_at        | NOS3        | nitric oxide synthase 3 (endothelial cell)                                                                               | 4846      | Chr:7q36            | -1.2531                  | 14                    | -1.0311                                    |
| U37143_at        | 501_g_at         | CYP2J2      | cytochrome P450, subfamily IIJ (arachidonic acid epoxygenase) polypeptide 2                                              | 1573      | Chr:1p31.3-p31.2    | -1.2579                  | 26                    | -1.3844                                    |
| Y10659_at        | 35797_at         | IL13RA1     | interleukin 13 receptor, alpha 1                                                                                         | 3597      | Chr:Xq24            | -1.2703                  | NA                    | NA                                         |
| U66198_at        | 36232_at         | FGF13       | fibroblast growth factor 13                                                                                              | 2258      | Chr:Xq26.3          | -1.2226                  | 16                    | -1.0468                                    |
| S42457_at        | 37840_at         | CNGA1       | cyclic nucleotide gated channel alpha 1                                                                                  | 1259      | Chr:4p12-cen        | -1.205                   | NA                    | NA                                         |
| S69369_at        | 1344_at          | PAX3        | paired box gene 3 (Waardenburg syndrome 1)                                                                               | 5077      | Chr:2q35            | -1.2268                  | 20                    | -1.1813                                    |
| Z22780_at        | 365_at           | CYL1C1      | cyclin, basic protein of sperm head cytoskeleton 1                                                                       | 1538      | Chr:Xq21.1          | -1.1961                  | NA                    | NA                                         |
| L42374_s_at      | 635_s_at         | PPP2R5B     | protein phosphatase 2, regulatory subunit B (B56), beta isoform                                                          | 5526      | Chr:11q12           | -1.2151                  | NA                    | NA                                         |
| AB006190_at      | 39568_g_at       | AQP7        | aquaporin 7                                                                                                              | 364       | Chr:9p13            | -1.1934                  | 24                    | -1.2135                                    |
| M60314_at        | 1831_at          | BMP5        | bone morphogenetic protein 5                                                                                             | 1831      | Chr:6p12.1          | -1.1913                  | 22                    | -1.131                                     |
| U37143_at        | 500_at           | CYP2J2      | cytochrome P450, subfamily IIJ (arachidonic acid epoxygenase) polypeptide 2                                              | 1573      | Chr:1p31.3-p31.2    | -1.1891                  | 26                    | -1.3844                                    |
| U81523_at        | 39325_at         | EBAF        | endometrial bleeding associated factor (left-right determination, factor A; transforming growth factor beta superfamily) | 7044      | Chr:1q42.1          | -1.1698                  | 22                    | -1.0966                                    |
| U59302_at        | 484_at           | NCOA1       | nuclear receptor coactivator 1                                                                                           | 8648      | Chr:2p23            | -1.1834                  | 24                    | -1.3458                                    |
| L13852_at        | 1294_at          | UBE1L       | ubiquitin-activating enzyme E1-like                                                                                      | 7318      | Chr:3p21            | -1.1664                  | 24                    | -1.2317                                    |
| L34409_at        | 35034_at         | ---         | Homo Sapiens (clone B3B3E13) chromosome 4p16.3 DNA fragment, mRNA sequence                                               | ---       | ---                 | -1.1521                  | ---                   | ---                                        |
| S80335_at        | 2019_s_at        | ITGB7       | integrin, beta 7                                                                                                         | 3695      | Chr:12q13.13        | -1.142                   | NA                    | NA                                         |
| U79280_at        | 41412_at         | PIPPIN      | ortholog of rat pippin                                                                                                   | 27254     | Chr:22q13.2-q13.31  | -1.1488                  | NA                    | NA                                         |
| U02687_at        | 34583_at         | FLT3        | fms-related tyrosine kinase 3                                                                                            | 2322      | Chr:13q12           | -1.1266                  | 20                    | -1.1412                                    |
| U76010_at        | 34457_at         | SLC30A3     | solute carrier family 30 (zinc transporter), member 3                                                                    | 7781      | Chr:7               | -1.1231                  | 21                    | -1.1333                                    |
