# Supplementary material
Source: PubMed Central journal article supplement (PMC4136479)
Supplement: NIHMS576591-supplement-STable_3.pdf [file NIHMS576591-supplement-STable_3.pdf]

Genes with P < M in 14/14 Cases, Full Model

| Hu6800 Probe Set | U95Av2 Probe Set | Gene Symbol | Title                                         | LocusLink | Location         | Avg Positive Fold Change | #P-M Pseudo-probe Sets | Avg. Positive Fold Change Pseudo-probe Sets |
|------------------|------------------|-------------|-----------------------------------------------|-----------|------------------|--------------------------|------------------------|---------------------------------------------|
| D79990_at        | 31666_f_at       | RASSF2      | Ras association (RalGDS/AF-6) domain family 2 | 9770      | Chr:20pter-p12.1 | 1.4222                   | 13                     | 1.8097                                      |
| X89399_s_at      | 1984_s_at        | ARHGDI8     | Rho GDP dissociation inhibitor (GDI) beta     | 397       | Chr:12p12.3      | 1.3088                   | NA                     | NA                                          |
| L20688_at        | 1984_s_at        | ARHGDI8     | Rho GDP dissociation inhibitor (GDI) beta     | 397       | Chr:12p12.3      | 1.2911                   | NA                     | NA                                          |

Genes with P < M in 13/14 Cases, Full Model

| Hu6800 Probe Set | U95Av2 Probe Set | Gene Symbol | Title                                                                                          | LocusLink | Location            | Avg Positive Fold Change | #P-M Pseudo-probe Sets | Avg. Positive Fold Change Pseudo-probe Sets |
|------------------|------------------|-------------|------------------------------------------------------------------------------------------------|-----------|---------------------|--------------------------|------------------------|---------------------------------------------|
| U03688_at        | 859_at           | CYP11B1     | Cytochrome P450, subfamily 1 (dioxin-inducible), polypeptide 1 (glaucoma 3, primary infantile) | 1545      | Chr:2p21            | 2.5548                   | 12                     | 2.7545                                      |
| U03688_at        | 40071_at         | CYP11B1     | Cytochrome P450, subfamily 1 (dioxin-inducible), polypeptide 1 (glaucoma 3, primary infantile) | 1545      | Chr:2p21            | 2.5166                   | 12                     | 2.7565                                      |
| L35594_at        | 41124_r_at       | ENPP2       | ectonucleotide pyrophosphatase/phosphodiesterase 2 (autotaxin)                                 | 5168      | Chr:8q24.1          | 1.6961                   | 13                     | 1.7554                                      |
| L35594_at        | 41123_s_at       | ENPP2       | ectonucleotide pyrophosphatase/phosphodiesterase 2 (autotaxin)                                 | 5168      | Chr:8q24.1          | 1.6668                   | 13                     | 1.7554                                      |
| X16663_at        | 31820_at         | HCLS1       | hematopoietic cell-specific Lyn substrate 1                                                    | 3059      | Chr:3q13            | 1.4418                   | 12                     | 1.8632                                      |
| J02923_at        | 37023_at         | LCP1        | lymphocyte cytosolic protein 1 (L-plastin)                                                     | 3936      | Chr:13q14.3         | 1.3755                   | NA                     | NA                                          |
| U00115_at        | 979_g_at         | BCLE5       | B-cell CLL/lymphoma 5 (zinc finger protein 51)                                                 | 604       | Chr:3q27            | 1.3307                   | 9                      | 1.1159                                      |
| X89109_s_at      | 38978_at         | CORO1A      | coronin, actin binding protein, 1A                                                             | 11151     | Chr:16p11.2         | 1.3148                   | 11                     | 1.4134                                      |
| X89101_s_at      | 37644_s_at       | TNFRSF6     | tumor necrosis factor receptor superfamily, member 6                                           | 355       | Chr:10q24.1         | 1.2969                   | 11                     | 1.1096                                      |
| U35113_at        | 38633_at         | MTA1        | metastasis associated 1                                                                        | 9112      | Chr:14q32.3         | 1.2288                   | 11                     | 1.1724                                      |
| U48251_at        | 37115_at         | PRKCBP1     | protein kinase C binding protein 1                                                             | 23613     | Chr:20q13.12        | 1.2265                   | 7                      | 0.99102                                     |
| U19713_s_at      | 33641_g_at       | AIF1        | allograft inflammatory factor 1                                                                | 199       | Chr:6p21.3          | 1.2222                   | 8                      | 1.2312                                      |
| J04605_at        | 36109_at         | PEPD        | peptidase D                                                                                    | 5184      | Chr:19q12-q13.2     | 1.1708                   | 11                     | 1.1914                                      |
| X80497_at        | 36480_at         | PHKA2       | phosphorylase kinase, alpha 2 (liver)                                                          | 5256      | Chr:Xq22.2-q22.1    | 1.1618                   | 11                     | 1.1011                                      |
| Y08766_s_at      | 41204_s_at       | SF1         | splicing factor 1                                                                              | 7536      | Chr:11q13           | 1.1466                   | 9                      | 1.0838                                      |
| M31724_at        | 591_s_at         | PTPN1       | protein tyrosine phosphatase, non-receptor type 1                                              | 5770      | Chr:20q13.1-q13.2   | 1.1398                   | 9                      | 1.0477                                      |
| U35113_at        | 1643_g_at        | MTA1        | metastasis associated 1                                                                        | 9112      | Chr:14q32.3         | 1.1171                   | 11                     | 1.1724                                      |
| Y12812_at        | 40970_at         | RFAP        | regulatory factor X-associated protein                                                         | 5994      | Chr:13q14           | 1.117                    | 6                      | 1.0027                                      |
| D86331_s_at      | 1167_s_at        | MMP15       | matrix metalloproteinase 15 (membrane-inserted)                                                | 4324      | Chr:16q13-q21       | 1.0957                   | NA                     | NA                                          |
| U65404_at        | 1748_s_at        | KLK1        | Kruppel-like factor 1 (erythroid)                                                              | 10661     | Chr:19p13.13-p13.12 | 1.0806                   | NA                     | NA                                          |
| M31724_at        | 40137_at         | PTPN1       | protein tyrosine phosphatase, non-receptor type 1                                              | 5770      | Chr:20q13.1-q13.2   | 1.0638                   | 9                      | 1.0477                                      |

Genes with P < M in 12/14 Cases, Full Model

| Hu6800 Probe Set | U95Av2 Probe Set | Gene Symbol | Title                                                                           | LocusLink | Location           | Avg Positive Fold Change | #P-M Pseudo-probe Sets | Avg. Positive Fold Change Pseudo-probe Sets |
|------------------|------------------|-------------|---------------------------------------------------------------------------------|-----------|--------------------|--------------------------|------------------------|---------------------------------------------|
| J03507_at        | 37394_at         | C7          | complement component 7                                                          | 730       | Chr:5p13           | 2.1884                   | 13                     | 2.7318                                      |
| M12529_at        | 608_at           | APOE        | apolipoprotein E                                                                | 348       | Chr:19q13.2        | 1.7824                   | 11                     | 1.8971                                      |
| X13839_at        | 32755_at         | ACTA2       | actin, alpha 2, smooth muscle, aorta                                            | 59        | Chr:10q23.3        | 1.6111                   | 12                     | 1.5621                                      |
| X64877_s_at      | 36341_s_at       | HFL3        | H factor (complement)-like 3                                                    | 3080      | Chr:1q31-q32.1     | 1.6062                   | 7                      | 1.0279                                      |
| Z30426_at        | 37645_at         | CD69        | CD69 antigen (p60, early T-cell activation antigen)                             | 969       | Chr:12p13-p12      | 1.5928                   | 13                     | 1.5824                                      |
| X57809_s_at      | 31459_i_at       | IGL @       | immunoglobulin lambda locus                                                     | 3535      | Chr:22q11.1-q11.2  | 1.5676                   | NA                     | NA                                          |
| U12255_at        | 36342_r_at       | EPOR        | epidermal growth factor receptor pathway substrate 8                            | 1467      | Chr:12q23-q24      | 1.5052                   | 11                     | 1.4537                                      |
| X57809_at        | 31459_i_at       | IGL @       | immunoglobulin lambda locus                                                     | 3535      | Chr:22q11.1-q11.2  | 1.4575                   | NA                     | NA                                          |
| M37033_at        | 38378_at         | CD53        | CD53 antigen                                                                    | 963       | Chr:1p13           | 1.4554                   | 11                     | 1.5585                                      |
| M98539_at        | 38407_r_at       | PTGDS       | prostaglandin D2 synthase 21kDa (brain)                                         | 5730      | Chr:9q34.2-q34.3   | 1.4553                   | 10                     | 1.3275                                      |
| X83490_s_at      | 37644_s_at       | TNFRSF6     | tumor necrosis factor receptor superfamily, member 6                            | 355       | Chr:10q24.1        | 1.4287                   | 11                     | 1.1096                                      |
| U50527_s_at      | 34239_at         | CGO18       | hypothetical gene CGO18                                                         | 90634     | Chr:13q12-q13      | 1.4077                   | 12                     | 1.4731                                      |
| M31241_s_at      | 35892_at         | CR1         | complement component (3b/4b) receptor 1, including Knops blood group system     | 1378      | Chr:1q32           | 1.4064                   | 1                      | 1.1219                                      |
| X64877_s_at      | 36342_r_at       | HFL3        | H factor (complement)-like 3                                                    | 3080      | Chr:1q31-q32.1     | 1.3954                   | 7                      | 1.0279                                      |
| X06318_at        | 106029_at        | PRKCB1      | protein kinase C, beta 1                                                        | 5579      | Chr:18p11.2        | 1.3721                   | 9                      | 1.353                                       |
| D79990_at        | 37598_at         | RASSF2      | Ras association (RalGDS/AF-6) domain family 2                                   | 9770      | Chr:20pter-p12.1   | 1.363                    | 13                     | 1.8097                                      |
| D87120_at        | 34322_r_at       | FAM3C       | family with sequence similarity 3, member C                                     | 10447     | Chr:7q22.1-q31.1   | 1.3479                   | NA                     | NA                                          |
| M73047_at        | 41459_at         | TPP2        | tripeptidyl peptidase II                                                        | 7174      | Chr:13q32-q33      | 1.2936                   | 7                      | 0.99872                                     |
| D50927_at        | 32219_at         | TLK1        | tousled-like kinase 1                                                           | 9874      | Chr:2q31.1         | 1.2846                   | 10                     | 1.1569                                      |
| U19713_s_at      | 37011_at         | AIF1        | allograft inflammatory factor 1                                                 | 199       | Chr:6p21.3         | 1.2707                   | 8                      | 1.2312                                      |
| U48959_at        | 32847_at         | MYLK        | myosin, light polypeptide kinase                                                | 4638      | Chr:3q21           | 1.2686                   | 10                     | 1.1253                                      |
| M31210_at        | 587_at           | EDG1        | endothelial differentiator, sphingolipid G-protein-coupled receptor, 1          | 1901      | Chr:10q21          | 1.2653                   | 10                     | 1.0536                                      |
| D50919_at        | 33253_at         | TRIM14      | tripartite motif-containing 14                                                  | 9830      | Chr:9q22.32        | 1.2641                   | 11                     | 1.166                                       |
| X91648_at        | 35221_at         | PURA        | purine-rich element binding protein A                                           | 5813      | Chr:5q31           | 1.2559                   | 8                      | 1.0449                                      |
| U48251_at        | 36957_at         | PRKCBP1     | protein kinase C binding protein 1                                              | 23613     | Chr:20q13.12       | 1.2493                   | 7                      | 0.99102                                     |
| U14664_at        | 34760_at         | BIMLEC      | C-type lectin BIMLEC precursor                                                  | 9936      | Chr:2q24.2         | 1.2422                   | NA                     | NA                                          |
| Y08766_s_at      | 41203_at         | SF1         | splicing factor 1                                                               | 7536      | Chr:11q13          | 1.2409                   | 9                      | 1.0638                                      |
| U12255_at        | 31431_at         | FCGR2       | Fc fragment of IgG, receptor, transporter, alpha                                | 2217      | Chr:19q13.3        | 1.2383                   | 11                     | 1.229                                       |
| X89101_s_at      | 1440_s_at        | TNFRSF6     | tumor necrosis factor receptor superfamily, member 6                            | 355       | Chr:10q24.1        | 1.2328                   | 11                     | 1.1096                                      |
| M68840_at        | 41770_at         | MAOA        | monoamine oxidase A                                                             | 4128      | Chr:Xp11.4-p11.3   | 1.2303                   | NA                     | NA                                          |
| AB000462_at      | 1303_at          | SH3BP2      | SH3-domain binding protein 2                                                    | 6452      | Chr:4p16.3         | 1.2158                   | 10                     | 1.1434                                      |
| S80267_s_at      | 548_s_at         | SYK         | spleen tyrosine kinase                                                          | 6850      | Chr:9q22           | 1.2139                   | NA                     | NA                                          |
| L27841_at        | 36682_at         | PCM1        | pericentriolar material 1                                                       | 5108      | Chr:8p22-p21.3     | 1.2076                   | NA                     | NA                                          |
| X69111_at        | 37043_at         | ID3         | inhibitor of DNA binding 3, dominant negative helix-loop-helix protein          | 3399      | Chr:1p36.13-p36.12 | 1.1991                   | 11                     | 1.2601                                      |
| D16469_at        | 35770_at         | ATP9B1P1    | ATPase, H+ transporting, lysosomal interacting protein 1                        | 537       | Chr:1q28           | 1.1986                   | 12                     | 1.16                                        |
| S50017_s_at      | 39768_at         | CNP         | 2',3'-cyclic nucleotide 3' phosphodiesterase                                    | 1267      | Chr:17q21          | 1.1952                   | 8                      | 1.0488                                      |
| D87467_at        | 38062_at         | GFR         | guanine nucleotide exchange factor for Rap1; M-Ras-regulated GEF                | 9771      | Chr:7p15.3         | 1.1887                   | 6                      | 1.0847                                      |
| U43965_at        | 36967_q_at       | ANK3        | ankyrin 3, node of Ranvier (ankyrin G)                                          | 288       | Chr:10q21.3        | 1.1849                   | 9                      | 0.89997                                     |
| X80907_at        | 34197_at         | PIK3R2      | phosphoinositide-3-kinase, regulatory subunit, polypeptide 2 (p85 beta)         | 5296      | Chr:19q13.2-q13.4  | 1.1844                   | NA                     | NA                                          |
| AB000464_at      | 41392_at         | ---         | Homo sapiens cDNA FLJ30057 fis, clone ADRGL200006, mRNA sequence                | ---       | ---                | 1.1771                   | NA                     | NA                                          |
| X57351_at        | 411_i_at         | IFITM2      | interferon induced transmembrane protein 2 (1-8D)                               | 10581     | Chr:11p15.5        | 1.172                    | NA                     | NA                                          |
| S81267_s_at      | 36885_at         | SYK         | spleen tyrosine kinase                                                          | 6850      | Chr:9q22           | 1.1718                   | NA                     | NA                                          |
| M81181_s_at      | 34118_at         | ATP1B2      | ATPase, Na(+)-K(+)-transporting, beta 2 polypeptide                             | 482       | Chr:17p13.1        | 1.1706                   | 11                     | 1.307                                       |
| L26494_at        | 33675_at         | POU3F1      | POU domain, class 3, transcription factor 1                                     | 5453      | Chr:1p34.1         | 1.17                     | 5                      | 0.97883                                     |
| U49188_at        | 37007_at         | TDE1        | tumor differentially expressed 1                                                | 10955     | Chr:20q13.1-13.3   | 1.1696                   | NA                     | NA                                          |
| Z34822_f_at      | 38001_at         | CACNA1C     | calcium channel, voltage-dependent, L type, alpha 1C subunit                    | 775       | Chr:12p13.3        | 1.1672                   | 8                      | 1.006                                       |
| X89101_s_at      | 389_s_at         | TNFRSF6     | tumor necrosis factor receptor superfamily, member 6                            | 355       | Chr:10q24.1        | 1.1661                   | 11                     | 1.1096                                      |
| M37271_s_at      | 771_s_at         | CD7         | CD7 antigen (p41)                                                               | 924       | Chr:17q25.2-q25.3  | 1.1651                   | NA                     | NA                                          |
| M82827_s_at      | 38788_at         | PHL         | promyelocytic leukemia                                                          | 5371      | Chr:15q22          | 1.1648                   | NA                     | NA                                          |
| U49742_at        | 39785_at         | RHO         | rhodopsin (opsin 2, rod pigment) (retinitis pigmentosa 4, autosomal dominant)   | 3275      | Chr:3q21-q24       | 1.1635                   | NA                     | NA                                          |
| L13852_at        | 1294_at          | UBE1L       | ubiquitin-activating enzyme E1-like                                             | 7318      | Chr:3p21           | 1.1575                   | 11                     | 1.1376                                      |
| S81661_s_at      | 32126_at         | FGF7        | fibroblast growth factor 7 (keratinocyte growth factor)                         | 2252      | Chr:15q15-q21.1    | 1.1565                   | 8                      | 1.0587                                      |
| U49742_at        | 39524_at         | RHO         | rhodopsin (opsin 2, rod pigment) (retinitis pigmentosa 4, autosomal dominant)   | 6010      | Chr:3q21-q24       | 1.1533                   | NA                     | NA                                          |
| U35376_at        | 36303_f_at       | ZNF85       | zinc finger protein 85 (HPF4, HTF1)                                             | 7639      | Chr:19p13.1-p12    | 1.1507                   | NA                     | NA                                          |
| X60992_at        | 40667_at         | CD6         | CD6 antigen                                                                     | 923       | Chr:11q13          | 1.1486                   | NA                     | NA                                          |
| U9546_r_at       | 38780_f_at       | BTNA2       | butyrophilin, subfamily 3, member A2                                            | 11118     | Chr:6p22.1         | 1.1484                   | NA                     | NA                                          |
| D25279_at        | 32657_at         | KIAA0036    | KIAA0036 gene product                                                           | 8657      | Chr:3q13-q33       | 1.1467                   | 9                      | 1.214                                       |
| U04270_at        | 38225_at         | KCNH2       | potassium voltage-gated channel, subfamily H (eag-related), member 2            | 3757      | Chr:7q35-q36       | 1.1424                   | 6                      | 1.0118                                      |
| U69645_at        | 37266_at         | ZNF32       | zinc finger protein 32 (KOX 30)                                                 | 7580      | Chr:10q22-q25      | 1.1416                   | 9                      | 1.055                                       |
| M38449_s_at      | 41445_at         | TGFB1       | transforming growth factor, beta 1 (Camurati-Engelmann disease)                 | 7040      | Chr:19q13.2        | 1.14                     | 12                     | 1.1419                                      |
| M62324_at        | 38278_at         | MRF-1       | modulator recognition factor 1                                                  | 10865     | Chr:2q11.1         | 1.1375                   | 8                      | 1.0506                                      |
| L77567_s_at      | 39825_at         | SLC25A1     | solute carrier family 25 (mitochondrial carrier; citrate transporter), member 1 | 6576      | Chr:22q11.21       | 1.1354                   | 10                     | 1.0452                                      |

|               |            |                |                                                         |      |                     |        |     |        |
|---------------|------------|----------------|---------------------------------------------------------|------|---------------------|--------|-----|--------|
| U44060_at     | 31918_at   | <i>PROX1</i>   | prospero-related homeobox 1                             | 5629 | Chr:1q32.2-q32.3    | 1.1323 | 12  | 1.0885 |
| U84487_at     | 823_at     | <i>CX3CL1</i>  | chemokine (C-X3-C motif) ligand 1                       | 6376 | Chr:16q13           | 1.1227 | NA  | NA     |
| M83652_s_at   | 39997_at   | <i>PPC</i>     | properdin P factor, complement                          | 5199 | Chr:Xp11.3-p11.23   | 1.1119 | 12  | 1.2217 |
| U14575_at     | 37705_at   | <i>PPP1R8</i>  | protein phosphatase 1, regulatory (inhibitor) subunit 8 | 5511 | Chr:1p35            | 1.1164 | 9   | 1.0743 |
| D67029_at     | 36207_at   | <i>SEC14L1</i> | SEC14-like 1 (S. cerevisiae)                            | 6397 | Chr:17q25.1-17q25.2 | 1.1157 | 7   | 1.1114 |
| Z50749_at     | 41540_at   | <i>PPP1R7</i>  | protein phosphatase 1, regulatory subunit 7             | 5510 | Chr:2q37.3          | 1.1137 | 11  | 1.1816 |
| D83920_at     | 36447_at   | <i>FCN1</i>    | ficolin (collagen/fibrinogen domain containing) 1       | 2219 | Chr:9q34            | 1.1104 | 9   | 1.0979 |
| U35113_at     | 1642_at    | <i>MTA1</i>    | metastasis associated 1                                 | 9112 | Chr:14q32.3         | 1.1098 | 11  | 1.1724 |
| AC002477_s_at | 36565_at   | <i>ZNF183</i>  | zinc finger protein 183 (RING finger, C3HC4 type)       | 7737 | Chr:Xq25-q26        | 1.1088 | 11  | 1.2838 |
| U80628_at     | 144_at     | <i>TK2</i>     | thymidine kinase 2, mitochondrial                       | 7084 | Chr:16q22-q23.1     | 1.1004 | NA  | NA     |
| D86331_s_at   | 160037_at  | <i>MMP15</i>   | matrix metalloproteinase 15 (membrane-inserted)         | 4324 | Chr:16q13-q21       | 1.0603 | NA  | NA     |
| U17029_s_at   | 38964_r_at | <i>WAS</i>     | Wiskott-Aldrich syndrome (eczema-thrombocytopenia)      | 7454 | Chr:Xp11.4-p11.21   | 1.0771 | 9   | 1.0755 |
| X69550_at     | 40164_at   | <i>ARHGDI4</i> | Rho GDI dissociation inhibitor (GDI) alpha              | 396  | Chr:17q25.3         | 1.0758 | 10  | 1.1268 |
| U02019_at     | 38015_at   | ---            | P37 AUF1, mRNA sequence                                 | ---  | ---                 | 1.0716 | --- | ---    |

### Genes with P < M in 11/14 Cases, Full Model

| Hu6800 Probe Set   | U95Av2 Probe Set | Gene Symbol      | Title                                                                                                                         | LocusLink | Location            | Avg Positive Fold Change | #P-M Pseudo-probe Sets | Avg. Positive Fold Change Pseudo-probe Sets |
|--------------------|------------------|------------------|-------------------------------------------------------------------------------------------------------------------------------|-----------|---------------------|--------------------------|------------------------|---------------------------------------------|
| U37546_s_at        | 1717_s_at        | <i>BIRC3</i>     | baculoviral IAP repeat-containing 3                                                                                           | 330       | Chr:11q22           | 1.9534                   | 11                     | 1.3839                                      |
| U65404_at          | 137_at           | <i>KLF1</i>      | Kruppel-like factor 1 (erythroid)                                                                                             | 10661     | Chr:19p13.13-p13.12 | 1.9473                   | NA                     | NA                                          |
| X53319_at          | 36483_at         | <i>MGP</i>       | matrix Gla protein                                                                                                            | 4256      | Chr:12p13.1-p12.3   | 1.69                     | NA                     | NA                                          |
| X89101_s_at        | 1441_s_at        | <i>TNFRSF6</i>   | tumor necrosis factor receptor superfamily, member 6                                                                          | 355       | Chr:10q24.1         | 1.6919                   | 11                     | 1.1096                                      |
| M9539_at           | 216_at           | <i>PTGDS</i>     | prostaglandin D2 synthase 21kDa (brain)                                                                                       | 5730      | Chr:9q34.2-q34.3    | 1.638                    | 10                     | 1.3275                                      |
| U10550_at          | 37279_at         | <i>GEM</i>       | GTP binding protein overexpressed in skeletal muscle                                                                          | 2669      | Chr:8q13-q21        | 1.5689                   | 10                     | 1.4854                                      |
| X57809_s_at        | 31344_at         | <i>IGL@</i>      | immunoglobulin lambda locus                                                                                                   | 3535      | Chr:22q11.1-q11.2   | 1.5276                   | NA                     | NA                                          |
| L06797_s_at        | 649_s_at         | <i>CXCR4</i>     | chemokine (C-X-C motif) receptor 4                                                                                            | 7852      | Chr:2q21            | 1.5148                   | NA                     | NA                                          |
| L35594_at          | 41125_r_at       | <i>ENPP2</i>     | ectonucleotide pyrophosphatase/phosphodiesterase 2 (autotaxin)                                                                | 5168      | Chr:8q24.1          | 1.4814                   | 13                     | 1.7554                                      |
| AC002045_xp12_s_at | 33836_at         | <i>NUP2</i>      | nuclear pore complex interacting protein                                                                                      | 9284      | Chr:16p13-p11       | 1.4712                   | NA                     | NA                                          |
| M9539_at           | 38406_f_at       | <i>PTGDS</i>     | prostaglandin D2 synthase 21kDa (brain)                                                                                       | 5730      | Chr:9q34.2-q34.3    | 1.4688                   | 10                     | 1.3275                                      |
| M12529_at          | 40565_at         | <i>APOE</i>      | apolipoprotein E                                                                                                              | 348       | Chr:19q13.2         | 1.465                    | 11                     | 1.8971                                      |
| Y00062_at          | 40518_at         | <i>PTPRC</i>     | protein tyrosine phosphatase, receptor type, C                                                                                | 5788      | Chr:1q31-q32        | 1.4539                   | NA                     | NA                                          |
| L17418 cds2_s_at   | 35892_at         | <i>CR1</i>       | complement component (3b/4b) receptor 1, including Knops blood group system                                                   | 1378      | Chr:1q32            | 1.4504                   | 10                     | 1.1219                                      |
| U37352_at          | 40784_at         | <i>PPP2R5C</i>   | protein phosphatase 2, regulatory subunit B (B56), gamma isoform                                                              | 5527      | Chr:3p21            | 1.4349                   | 11                     | 1.2127                                      |
| X57809_at          | 31344_at         | <i>IGL@</i>      | immunoglobulin lambda locus                                                                                                   | 3535      | Chr:22q11.1-q11.2   | 1.4203                   | NA                     | NA                                          |
| M30938_at          | 584_s_at         | <i>XRCO5</i>     | X-ray repair complementing defective repair in Chinese hamster cells 5 (double-strand-break rejoining; Ku autoantigen, 80kDa) | 7520      | Chr:2q35            | 1.419                    | 8                      | 1.2977                                      |
| X61118_mol1_at     | 32184_at         | <i>LMO2</i>      | LIM domain only 2 (homeotic-like 1)                                                                                           | 4005      | Chr:17p13           | 1.4181                   | 8                      | 1.2356                                      |
| X76061_at          | 1986_at          | <i>RLB1</i>      | retinoblastoma-like 2 (p130)                                                                                                  | 5934      | Chr:16q12-qter      | 1.418                    | 10                     | 1.248                                       |
| U20158_at          | 39319_at         | <i>LCP2</i>      | lymphocyte cytosolic protein 2 (SH2 domain containing leukocyte protein of 76kDa)                                             | 3937      | Chr:5q33.1-qter     | 1.418                    | 10                     | 1.3429                                      |
| AB000468_at        | 35777_at         | <i>RNF4</i>      | ring finger protein 4                                                                                                         | 6047      | Chr:4p16.3          | 1.4102                   | 9                      | 1.1552                                      |
| Y00062_at          | 40520_g_at       | <i>PTPRC</i>     | protein tyrosine phosphatase, receptor type, C                                                                                | 5788      | Chr:1q31-q32        | 1.4077                   | NA                     | NA                                          |
| X67698_at          | 39345_at         | <i>NPC2</i>      | Niemann-Pick disease, type C2                                                                                                 | 10577     | Chr:14q24.3         | 1.4                      | 12                     | 1.3294                                      |
| X82200_at          | 36255_at         | <i>TRIM22</i>    | tripartite motif-containing 22                                                                                                | 10346     | Chr:11p15           | 1.3947                   | 12                     | 1.4195                                      |
| X62486_at          | 34210_at         | <i>CDW52</i>     | CDW52 antigen (CDMPA/TH-1 antigen)                                                                                            | 4943      | Chr:12p26           | 1.3933                   | 10                     | 1.2436                                      |
| X89101_s_at        | 37643_at         | <i>TNFRSF6</i>   | tumor necrosis factor receptor superfamily, member 6                                                                          | 355       | Chr:10q24.1         | 1.3859                   | 11                     | 1.1096                                      |
| U62434_at          | 36397_at         | <i>CHRNA5</i>    | cholinergic receptor, nicotinic, alpha polypeptide 5                                                                          | 1138      | Chr:15q24           | 1.3848                   | 7                      | 1.0127                                      |
| D43636_at          | 481_at           | <i>SNRK</i>      | SNF-1 related kinase                                                                                                          | 54861     | Chr:3p21.32         | 1.3809                   | 9                      | 1.0838                                      |
| M13560_s_at        | 35016_at         | <i>CD74</i>      | CD74 antigen (invariant polypeptide of major histocompatibility complex, class II antigen-associated)                         | 972       | Chr:5q32            | 1.379                    | 11                     | 1.4859                                      |
| X06318_at          | 1336_s_at        | <i>PRKCB1</i>    | protein kinase C, beta 1                                                                                                      | 5579      | Chr:16p11.2         | 1.3747                   | 9                      | 1.353                                       |
| X04702_s_at        | 37918_at         | <i>ITGB2</i>     | integrin, beta 2 (antigen CD18 (p95), lymphocyte function-associated antigen 1; macrophage antigen 1 (mac-1) beta subunit)    | 3689      | Chr:2q35            | 1.3714                   | NA                     | NA                                          |
| M97796_s_at        | 41215_at         | <i>ID2</i>       | inhibitor of DNA binding 2 (dominant negative helix-loop-helix protein)                                                       | 3398      | Chr:2p25            | 1.3708                   | 10                     | 1.1452                                      |
| U31384_at          | 37908_at         | <i>GNP11</i>     | guanine nucleotide binding protein (G protein), gamma 11                                                                      | 2791      | Chr:7q31-q32        | 1.3688                   | 9                      | 1.1204                                      |
| L46720_s_at        | 41124_r_at       | <i>ENPP2</i>     | ectonucleotide pyrophosphatase/phosphodiesterase 2 (autotaxin)                                                                | 5168      | Chr:8q24.1          | 1.3618                   | 13                     | 1.7554                                      |
| L19493_s_at        | 37994_at         | <i>FMR1</i>      | fragile X mental retardation 1                                                                                                | 2332      | Chr:Xq27.3          | 1.3587                   | 11                     | 1.1926                                      |
| X83490_s_at        | 1440_s_at        | <i>TNFRSF6</i>   | tumor necrosis factor receptor superfamily, member 6                                                                          | 355       | Chr:10q24.1         | 1.3581                   | 11                     | 1.1096                                      |
| M98833_at          | 41425_at         | <i>FLI1</i>      | Friend leukemia virus integration 1                                                                                           | 2313      | Chr:11q24.1-q24.3   | 1.347                    | 8                      | 1.1697                                      |
| U50527_s_at        | 1527_s_at        | <i>CGO18</i>     | hypothetical gene CGO18                                                                                                       | 90634     | Chr:13q12-q13       | 1.3443                   | 12                     | 1.4731                                      |
| X06319_at          | 37301_at         | <i>PRKCB1</i>    | protein kinase C, beta 1                                                                                                      | 5579      | Chr:16p11.2         | 1.3416                   | 9                      | 1.1697                                      |
| L46720_s_at        | 41123_s_at       | <i>ENPP2</i>     | ectonucleotide pyrophosphatase/phosphodiesterase 2 (autotaxin)                                                                | 5168      | Chr:8q24.1          | 1.3382                   | 13                     | 1.7554                                      |
| M29610_s_at        | 41024_f_at       | <i>GYPE</i>      | glycophorin E                                                                                                                 | 2996      | Chr:4q28-q31        | 1.3285                   | 6                      | 0.81389                                     |
| U37352_at          | 40785_g_at       | <i>PPP2R5C</i>   | protein phosphatase 2, regulatory subunit B (B56), gamma isoform                                                              | 5527      | Chr:3p21            | 1.3219                   | 11                     | 1.2127                                      |
| X98258_at          | 35969_at         | <i>MPHOSPH9</i>  | M-phase phosphoprotein 9                                                                                                      | 10198     | Chr:12q24.31        | 1.3192                   | NA                     | NA                                          |
| X06318_at          | 1217_g_at        | <i>PRKCB1</i>    | protein kinase C, beta 1                                                                                                      | 5579      | Chr:16p11.2         | 1.3182                   | 9                      | 1.353                                       |
| D37931_at          | 32664_at         | <i>RNASE4</i>    | ribonuclease, RNase A family, 4                                                                                               | 6038      | Chr:14q11.1         | 1.3178                   | NA                     | NA                                          |
| M19311_at          | 911_s_at         | <i>CALM2</i>     | calmodulin 2 (phosphorylase kinase, delta)                                                                                    | 805       | Chr:2p21            | 1.3163                   | 7                      | 1.1156                                      |
| S76473_s_at        | 38280_s_at       | <i>NTRK2</i>     | neurotrophic tyrosine kinase, receptor, type 2                                                                                | 4915      | Chr:9q22.1          | 1.3163                   | 6                      | 1.0147                                      |
| J03077_s_at        | 36795_at         | <i>PSAP</i>      | prosaposin (variant Gaucher disease and variant metachromatic leukodystrophy)                                                 | 5660      | Chr:10q21-q22       | 1.3151                   | 11                     | 1.1839                                      |
| U19495_s_at        | 32666_at         | ---              | Intercrine-alpha, mRNA sequence                                                                                               | ---       | ---                 | 1.3088                   | ---                    | ---                                         |
| U37352_at          | 40786_at         | <i>PPP2R5C</i>   | protein phosphatase 2, regulatory subunit B (B56), gamma isoform                                                              | 5527      | Chr:3p21            | 1.2976                   | 11                     | 1.2127                                      |
| S76473_s_at        | 33182_at         | <i>NTRK2</i>     | neurotrophic tyrosine kinase, receptor, type 2                                                                                | 4915      | Chr:9q22.1          | 1.2963                   | 6                      | 1.0147                                      |
| L78132_at          | 1846_at          | <i>LGALS9</i>    | lectin, galactoside-binding, soluble, 9 (galectin 8)                                                                          | 3964      | Chr:10q42-q43       | 1.2856                   | NA                     | NA                                          |
| X83490_s_at        | 389_s_at         | <i>TNFRSF6</i>   | tumor necrosis factor receptor superfamily, member 6                                                                          | 355       | Chr:10q24.1         | 1.2846                   | 11                     | 1.1096                                      |
| D50915_at          | 33528_at         | <i>KIAA0125</i>  | KIAA0125 gene product                                                                                                         | 9834      | Chr:14q32.33        | 1.2837                   | 9                      | 1.2287                                      |
| X59350_at          | 38522_s_at       | <i>CD22</i>      | CD22 antigen                                                                                                                  | 933       | Chr:19q13.1         | 1.2777                   | 10                     | 1.4785                                      |
| M12959_s_at        | 31430_at         | <i>TRA@</i>      | T cell receptor alpha locus                                                                                                   | 6955      | Chr:14q11.2         | 1.2737                   | 11                     | 1.5908                                      |
| U32989_at          | 38606_at         | <i>TDO2</i>      | tryptophan 2,3-dioxygenase                                                                                                    | 6999      | Chr:4q31-q32        | 1.2702                   | NA                     | NA                                          |
| U12255_at          | 31432_g_at       | <i>FCGRT</i>     | Fc fragment of IgG, receptor, transporter, alpha                                                                              | 2217      | Chr:19q13.3         | 1.27                     | 11                     | 1.229                                       |
| M68940_at          | 41771_g_at       | <i>MAOA</i>      | monoamine oxidase A                                                                                                           | 4128      | Chr:Xp11.4-p11.3    | 1.2663                   | NA                     | NA                                          |
| U49020 cds2_s_at   | 41747_s_at       | <i>MEF2A</i>     | MADS box transcription enhancer factor 2, polypeptide A (myocyte enhancer factor 2A)                                          | 4205      | Chr:15q26           | 1.2649                   | NA                     | NA                                          |
| X63753_at          | 39096_at         | <i>SON</i>       | SON DNA binding protein                                                                                                       | 6651      | Chr:21q22.11        | 1.2619                   | 11                     | 1.199                                       |
| D83783_at          | 40988_at         | <i>TNRC11</i>    | trinucleotide repeat containing 11 (THR-associated protein, 230kDa subunit)                                                   | 9968      | Chr:Xq13            | 1.2519                   | 10                     | 1.244                                       |
| J04430_s_at        | 677_s_at         | <i>ACPS5</i>     | acid phosphatase 5, tartrate resistant                                                                                        | 54        | Chr:19p13.3-p13.2   | 1.2509                   | NA                     | NA                                          |
| U09609_at          | 40362_at         | <i>NFKB2</i>     | nuclear factor of kappa light polypeptide gene enhancer in B-cells 2 (p49/p100)                                               | 4791      | Chr:10q24           | 1.2499                   | 8                      | 1.0931                                      |
| L19493_s_at        | 37995_s_at       | <i>FMR1</i>      | fragile X mental retardation 1                                                                                                | 2332      | Chr:Xq27.3          | 1.2485                   | 11                     | 1.1926                                      |
| U69546_at          | 32851_at         | <i>CUGBP2</i>    | CUG triplet repeat, RNA binding protein 2                                                                                     | 10659     | Chr:10p13           | 1.2451                   | NA                     | NA                                          |
| M28826_at          | 34927_at         | <i>CD1B</i>      | CD1B antigen, b polypeptide                                                                                                   | 910       | Chr:10q22-q23       | 1.2436                   | 11                     | 1.0659                                      |
| U72342_at          | 37342_at         | <i>PALF4/IB1</i> | palmitoyl-activating factor acetylhydrolase, isoform Ib, alpha subunit 45kDa                                                  | 3717      | Chr:7p15.3          | 1.2433                   | 10                     | 1.2273                                      |
| X67337_at          | 35757_at         | <i>CPSF6</i>     | cleavage and polyadenylation specific factor 6, 68kDa                                                                         | 11052     | Chr:12q14.3         | 1.2401                   | NA                     | NA                                          |
| U05237_at          | 41091_at         | <i>FALZ</i>      | fetal Alzheimer antigen                                                                                                       | 2186      | Chr:17q24           | 1.2316                   | 10                     | 1.1912                                      |
| L16316_at          | 1919_at          | <i>VAV1</i>      | vav 1 oncogene                                                                                                                | 7409      | Chr:19p13.2         | 1.2296                   | 10                     | 1.3275                                      |
| U72936_s_at        | 39147_g_at       | <i>ATRX</i>      | alpha thalassemia/mental retardation syndrome X-linked (RAD5 homolog, S. cerevisiae)                                          | 546       | Chr:Xq13.1-q21.1    | 1.2295                   | 10                     | 1.1522                                      |
| D00860_at          | 36489_at         | <i>PRPS1</i>     | phosphoribosyl pyrophosphate synthetase 1                                                                                     | 5631      | Chr:Xq21-q27        | 1.2291                   | 9                      | 1.1249                                      |
| D39552_at          | 41638_at         | <i>KIAA0073</i>  | KIAA0073 protein                                                                                                              | 23398     | Chr:9q12.2          | 1.229                    | NA                     | NA                                          |
| Y08662_mol1_s_at   | 35396_g_at       | <i>CPT1B</i>     | carbamoyl palmitoyltransferase 1B (muscle)                                                                                    | 35396     | Chr:22q13.33        | 1.2275                   | 9                      | 1.079                                       |
| D84294_at          | 39065_s_at       | <i>ITIC3</i>     | tetratricopeptide repeat domain 3                                                                                             | 7267      | Chr:21q22.2         | 1.2255                   | 12                     | 1.1958                                      |
| D63877_at          | 37642_at         | <i>KIAA0157</i>  | KIAA0157 protein                                                                                                              | 23172     | Chr:10q26.2         | 1.2235                   | 9                      | 1.0825                                      |
| M74491_at          | 39336_at         | <i>ARF3</i>      | ADP-ribosylation factor 3                                                                                                     | 377       | Chr:12q13           | 1.222                    | 10                     | 1.1189                                      |
| U26266_s_at        | 37722_s_at       | <i>DHPS</i>      | deoxyhypusine synthase                                                                                                        | 1725      | Chr:19p13.11-p13.12 | 1.2199                   | 10                     | 1.074                                       |

|                 |            |                 |                                                                                                                 |       |                     |        |    |         |
|-----------------|------------|-----------------|-----------------------------------------------------------------------------------------------------------------|-------|---------------------|--------|----|---------|
| U43965_at       | 36966_at   | <i>ANK3</i>     | ankyrin 3, node of Ranvier (ankyrin G)                                                                          | 288   | Chr:10q21           | 1.2184 | 6  | 0.89997 |
| U58089_at       | 37702_at   | <i>CUL3</i>     | cullin 3                                                                                                        | 8452  | Chr:2q36.3          | 1.2182 | NA | NA      |
| U61167_at       | 36420_at   | <i>ITSN2</i>    | intersectin 2                                                                                                   | 50618 | Chr:2pter-p25.1     | 1.2174 | NA | NA      |
| J05582_s_at     | 38783_at   | <i>MUC1</i>     | mucin 1, transmembrane                                                                                          | 4582  | Chr:1q21            | 1.2164 | NA | NA      |
| D78134_at       | 39864_at   | <i>CRBP</i>     | cold inducible RNA binding protein                                                                              | 1153  | Chr:11p13.3         | 1.2155 | 10 | 1.1447  |
| M5422_at        | 36783_f_at | <i>H-pik</i>    | Kruppel-related zinc finger protein                                                                             | 51351 | Chr:7q11.1          | 1.2135 | NA | NA      |
| U79260_at       | 37242_at   | <i>MGC5149</i>  | hypothetical protein MGC5149                                                                                    | 79068 | Chr:18q12.1         | 1.2133 | 9  | 1.0768  |
| Y08915_at       | 34391_at   | <i>IGBP1</i>    | immunoglobulin (CD79A) binding protein 1                                                                        | 3476  | Chr:Xq13.1-q13.3    | 1.2112 | 13 | 1.4108  |
| M19650_s_at     | 39768_at   | <i>CNP</i>      | 2',3'-cyclic nucleotide 3' phosphodiesterase                                                                    | 1267  | Chr:17q21           | 1.2104 | 8  | 1.0488  |
| D87076_at       | 38342_at   | <i>KIAA0239</i> | KIAA0239 protein                                                                                                | 23338 | Chr:5q31.1          | 1.2103 | NA | NA      |
| L36151_at       | 40783_s_at | <i>PK4CA</i>    | phosphatidylinositol 4-kinase, catalytic, alpha polypeptide                                                     | 5297  | Chr:22q11.21        | 1.2101 | 9  | 1.1291  |
| M68940_at       | 41772_at   | <i>MAOA</i>     | monoamine oxidase A                                                                                             | 4172  | Chr:Xq11.4-q11.3    | 1.2098 | NA | NA      |
| X68505_s_at     | 41747_at   | <i>MEF2A</i>    | MADS box transcription enhancer factor 2, polypeptide A (myocyte enhancer factor 2A)                            | 4205  | Chr:15q26           | 1.2096 | NA | NA      |
| X64559_at       | 36569_at   | <i>TNA</i>      | tetranectin (plasminogen binding protein)                                                                       | 7123  | Chr:3p22-p21.3      | 1.2084 | 7  | 1.1921  |
| AB000381_s_at   | 378_s_at   | <i>GML</i>      | GPI anchored molecule like protein                                                                              | 2765  | Chr:8q24.3          | 1.2081 | NA | NA      |
| D79992_at       | 32662_at   | <i>KIAA0170</i> | KIAA0170 gene product                                                                                           | 9656  | Chr:6pter-p21.31    | 1.2058 | 12 | 1.1678  |
| U48251_at       | 842_at     | <i>PRKCBP1</i>  | protein kinase C binding protein 1                                                                              | 23613 | Chr:20q13.12        | 1.2057 | 7  | 0.99102 |
| U72936_s_at     | 816_s_at   | <i>ATRX</i>     | alpha thalassemia/mental retardation syndrome X-linked (RAD54 homolog, S. cerevisiae)                           | 546   | Chr:Xq13.1-q21.1    | 1.2051 | 10 | 1.1522  |
| X63131_s_at     | 38788_at   | <i>PNL</i>      | promyelocytic leukemia                                                                                          | 5371  | Chr:15q22           | 1.2047 | NA | NA      |
| D30755_at       | 38971_r_at | <i>TNIP1</i>    | TNFAIP3-interacting protein 1                                                                                   | 10318 | Chr:5q32-q33.1      | 1.203  | 10 | 1.1136  |
| M81886_s_at     | 36853_at   | <i>GRIA1</i>    | glutamate receptor, ionotropic, AMPA 1                                                                          | 2890  | Chr:5q31.1          | 1.2028 | 4  | 0.92209 |
| X98337_s_at     | 31591_s_at | <i>FHR-4</i>    | complement factor H-related 4                                                                                   | 10877 | Chr:1q32            | 1.2025 | 10 | 1.0396  |
| M88579_at       | 32220_at   | <i>ZNF187</i>   | zinc finger protein 187                                                                                         | 7741  | Chr:6p21.31         | 1.2015 | NA | NA      |
| U72936_s_at     | 39146_at   | <i>ATRX</i>     | alpha thalassemia/mental retardation syndrome X-linked (RAD54 homolog, S. cerevisiae)                           | 546   | Chr:Xq13.1-q21.1    | 1.2009 | 10 | 1.1522  |
| X60299_s_at     | 33159_at   | <i>KAL1</i>     | Kallmann syndrome 1 sequence                                                                                    | 3730  | Chr:Xq22.32         | 1.1993 | 9  | 1.2378  |
| U04735_at       | 38677_at   | <i>STCH</i>     | Steinert 70 protein chaperone, microsome-associated, 60kDa                                                      | 3877  | Chr:17q11.1         | 1.1985 | 6  | NA      |
| U90907_at       | 37961_at   | <i>PIK3R3</i>   | phosphoinositide-3-kinase, regulatory subunit, polypeptide 3 (p55, gamma)                                       | 8503  | Chr:1p33            | 1.1979 | 6  | 1.0144  |
| M62831_at       | 36097_at   | <i>ETR101</i>   | immediate early protein                                                                                         | 9592  | Chr:19p13.12        | 1.1969 | 10 | 1.0579  |
| U66464_at       | 138_at     | <i>MAP4K1</i>   | mitogen-activated protein kinase kinase kinase 1                                                                | 11184 | Chr:19q13.1-q13.4   | 1.196  | 10 | 1.301   |
| X15331_s_at     | 36489_at   | <i>PRPS1</i>    | phosphoribosyl pyrophosphate synthetase 1                                                                       | 5631  | Chr:Xq21-q27        | 1.1951 | 9  | 1.1249  |
| X91648_at       | 41344_s_at | <i>PURA</i>     | purine-rich element binding protein A                                                                           | 5813  | Chr:5q31            | 1.1919 | 8  | 1.0449  |
| U57057_at       | 36317_at   | <i>CORO2A</i>   | coronin, actin binding protein, 2A                                                                              | 7464  | Chr:9q22.3          | 1.191  | 8  | 1.0278  |
| Y08692_ma1_s_at | 35335_at   | <i>CTP1B</i>    | cytosolic palmitoyltransferase 1B (muscle)                                                                      | 4371  | Chr:22q13.33        | 1.1905 | 9  | 1.079   |
| M81750_at       | 35012_at   | <i>MINDA</i>    | myeloid cell nuclear differentiation antigen                                                                    | 4332  | Chr:19p13           | 1.1904 | NA | NA      |
| U71087_at       | 1699_at    | <i>MAP2K5</i>   | mitogen-activated protein kinase kinase 5                                                                       | 5607  | Chr:15q22.2         | 1.1892 | 9  | 1.0342  |
| Y00291_at       | 32694_at   | <i>RARB</i>     | retinoic acid receptor, beta                                                                                    | 5915  | Chr:3p24            | 1.1892 | 10 | 1.0809  |
| X66533_at       | 37243_at   | <i>GUCY1B3</i>  | guanylate cyclase 1, soluble, beta 3                                                                            | 2983  | Chr:4q31.3-q33      | 1.1882 | NA | NA      |
| U23736_s_at     | 316_g_at   | <i>PRDM2</i>    | PR domain containing 2, with ZNF domain                                                                         | 7799  | Chr:1p36            | 1.1878 | 6  | 0.97448 |
| M81886_s_at     | 36854_s_at | <i>GRIA1</i>    | glutamate receptor, ionotropic, AMPA 1                                                                          | 2890  | Chr:5q31.1          | 1.1874 | 4  | 0.92209 |
| D43949_at       | 40054_at   | <i>KIAA0082</i> | KIAA0082 protein                                                                                                | 23070 | Chr:9p21.2          | 1.1866 | 11 | 1.0875  |
| J05582_s_at     | 927_r_at   | <i>MUC1</i>     | mucin 1, transmembrane                                                                                          | 4582  | Chr:1q21            | 1.184  | NA | NA      |
| X15414_at       | 36589_at   | <i>AKR1B1</i>   | aldo-keto reductase family 1, member B1 (aldose reductase)                                                      | 231   | Chr:7q35            | 1.1835 | 10 | 1.1426  |
| L13740_at       | 32265_at   | <i>NR4A1</i>    | nuclear receptor subfamily 4, group A, member 1                                                                 | 3164  | Chr:12q13           | 1.1818 | 9  | 1.1062  |
| D14827_at       | 34456_s_at | <i>GLI2</i>     | GLI-Kruppel family member GLI2                                                                                  | 2736  | Chr:2q14            | 1.1797 | 7  | 0.96991 |
| M32011_at       | 41038_at   | <i>NCF2</i>     | neutrophil cytosolic factor 2 (65kDa, chronic granulomatous disease, autosomal 2)                               | 4688  | Chr:1q25            | 1.1794 | 7  | 0.96707 |
| U18242_at       | 31787_at   | <i>CAMLG</i>    | calcium modulatoin ligand                                                                                       | 819   | Chr:5q23            | 1.1777 | NA | NA      |
| U71087_at       | 1722_at    | <i>MAP2K5</i>   | mitogen-activated protein kinase kinase 5                                                                       | 5607  | Chr:15q22.2         | 1.1769 | 9  | 1.0342  |
| D30655_at       | 1420_at    | <i>EIF-4A2</i>  | eukaryotic translation initiation factor 4A, isoform 2                                                          | 1974  | Chr:12q24           | 1.1766 | NA | NA      |
| S57132_s_at     | 35169_at   | <i>COL16A1</i>  | collagen, type XVI, alpha 1                                                                                     | 1307  | Chr:1p35-p34        | 1.1759 | 7  | 0.93209 |
| Y00318_at       | 35698_at   | <i>IF</i>       | I factor (complement)                                                                                           | 3426  | Chr:4q25            | 1.1752 | 10 | 1.2083  |
| L25444_at       | 37271_at   | <i>TAF6</i>     | TAF6 RNA polymerase II, TATA box binding protein (TBP)-associated factor, 80kDa                                 | 6878  | Chr:7q22.1          | 1.174  | 10 | 1.2125  |
| M38449_s_at     | 1830_s_at  | <i>TGFBI</i>    | transforming growth factor, beta 1 (Camurati-Engelmann disease)                                                 | 7040  | Chr:19q13.2         | 1.1734 | 12 | 1.1419  |
| D87451_at       | 34883_at   | <i>RNF10</i>    | ring finger protein 10                                                                                          | 9921  | Chr:12q24.31        | 1.1728 | NA | NA      |
| X98986_s_at     | 37823_at   | <i>CCL8</i>     | chemokine (C-C motif) ligand 8                                                                                  | 6355  | Chr:17q11.2         | 1.1697 | NA | NA      |
| U19173_s_at     | 33640_at   | <i>AIF1</i>     | apoptosis inflammatory factor 1                                                                                 | 199   | Chr:9p21.3          | 1.1686 | 8  | 1.0312  |
| U07132_at       | 518_at     | <i>NR1H2</i>    | nuclear receptor subfamily 1, group H, member 2                                                                 | 7376  | Chr:19q13.3-19q13.3 | 1.1691 | 9  | 1.0312  |
| L22005_at       | 1273_r_at  | <i>CDC34</i>    | cell division cycle 34                                                                                          | 997   | Chr:19p13.3         | 1.1687 | NA | NA      |
| X89101_s_at     | 1808_s_at  | <i>TNFRSF6</i>  | tumor necrosis factor receptor superfamily, member 6                                                            | 355   | Chr:10q24.1         | 1.1685 | 11 | 1.1096  |
| L36051_at       | 1098_at    | <i>THPO</i>     | thrombopoietin (myeloproliferative leukemia virus oncogene ligand, megakaryocyte growth and development factor) | 7066  | Chr:3q27            | 1.1683 | 5  | 0.93328 |
| U72206_at       | 40099_at   | <i>ARHGGEF2</i> | rho/rac guanine nucleotide exchange factor (GEF) 2                                                              | 9181  | Chr:1q21-q22        | 1.1658 | 10 | 1.1497  |
| H11327_s_at     | 39672_at   | <i>PTPNI</i>    | protein tyrosine phosphatase, non-receptor type 7                                                               | 5778  | Chr:1q32.1          | 1.1643 | NA | NA      |
| D00860_at       | 36490_s_at | <i>PRPS1</i>    | phosphoribosyl pyrophosphate synthetase 1                                                                       | 5631  | Chr:Xq21-q27        | 1.1632 | 9  | 1.1249  |
| L09230_s_at     | 39994_at   | <i>CCR1</i>     | chemokine (C-C motif) receptor 1                                                                                | 1230  | Chr:3p21            | 1.1629 | 9  | 1.0329  |
| M34309_at       | 32787_at   | <i>ERBB3</i>    | v-erb-b2 erythroblastic leukemia viral oncogene homolog 3 (avian)                                               | 2065  | Chr:12q13           | 1.1628 | 8  | 0.99299 |
| S81661_s_at     | 1466_s_at  | <i>FGF7</i>     | fibroblast growth factor 7 (keratinocyte growth factor)                                                         | 2252  | Chr:15q15-q21.1     | 1.1616 | 8  | 1.0587  |
| D50683_at       | 1814_at    | <i>TGFBR2</i>   | transforming growth factor, beta receptor II (70/80kDa)                                                         | 7048  | Chr:3p22            | 1.1604 | NA | NA      |
| D50550_at       | 33200_at   | <i>LLGL1</i>    | lethal giant larvae homolog 1 (Drosophila)                                                                      | 3996  | Chr:17p11.2         | 1.1588 | NA | NA      |
| U07096_at       | 38547_at   | <i>ITGAL</i>    | integrin, alpha L (antigen CD11A (p180), lymphocyte function-associated antigen 1, alpha polypeptide)           | 3683  | Chr:16p11.2         | 1.1586 | NA | NA      |
| X62153_s_at     | 33252_at   | <i>MCMB3</i>    | MCMB3 minichromosome maintenance deficient 3 (S. cerevisiae)                                                    | 4172  | Chr:6p12            | 1.1586 | 9  | 1.0342  |
| M29696_at       | 1370_at    | <i>IL7R</i>     | interleukin 7 receptor                                                                                          | 3575  | Chr:5p13            | 1.1585 | 9  | 1.1066  |
| U10886_at       | 40582_at   | <i>PTPRJ</i>    | protein tyrosine phosphatase, receptor type, J                                                                  | 5795  | Chr:11p11.2         | 1.1574 | 8  | 1.0419  |
| M68941_at       | 1460_g_at  | <i>PTPN4</i>    | protein tyrosine phosphatase, non-receptor type 4 (megakaryocyte)                                               | 5775  | Chr:2q14.1          | 1.1558 | 9  | 1.0617  |
| M74826_at       | 32280_at   | <i>GAD2</i>     | glutamate decarboxylase 2 (pancreatic islets and brain, 65kDa)                                                  | 2572  | Chr:10p11.23        | 1.1543 | 6  | 0.98988 |
| Z34918_at       | 33907_at   | <i>EIF4G3</i>   | eukaryotic translation initiation factor 4 gamma, 3                                                             | 8672  | Chr:1p36.12         | 1.1511 | NA | NA      |
| J04599_at       | 38126_at   | <i>BGN</i>      | bielchcan                                                                                                       | 633   | Chr:Xq28            | 1.1501 | NA | NA      |
| M34353_s_at     | 593_s_at   | <i>RPS1</i>     | RPS1 UR2 sarcoma virus oncogene homolog 1 (avian)                                                               | 6098  | Chr:6p22            | 1.1492 | NA | NA      |
| M64099_at       | 38237_at   | <i>GGTLA1</i>   | gamma-glutamyltransferase-like activity 1                                                                       | 2687  | Chr:22q11.23        | 1.1487 | 10 | 1.1135  |
| D87457_at       | 35633_at   | <i>ELMO1</i>    | engulfment and cell motility 1 (ced-12 homolog, C. elegans)                                                     | 9844  | Chr:7p14.1          | 1.1486 | 10 | 1.2299  |
| X62573_at       | 34663_at   | <i>FCGR2B</i>   | Fc fragment of IgG, low affinity IIB, receptor for (CD32)                                                       | 2213  | Chr:1q23            | 1.1482 | NA | NA      |
| U19878_at       | 37258_at   | <i>TMEFF1</i>   | transmembrane protein with EGF-like and two follistatin-like domains 1                                          | 8577  | Chr:9q31            | 1.1481 | NA | NA      |
| D25215_at       | 35689_at   | <i>HERC3</i>    | hect domain and RLD 3                                                                                           | 8916  | Chr:4q21            | 1.1476 | 11 | 1.0833  |
| U09367_at       | 38603_at   | <i>ZNF136</i>   | zinc finger protein 136 (clone pHZ-20)                                                                          | 7695  | Chr:19p13.2-p13.12  | 1.1474 | 12 | 1.2542  |
| D84110_at       | 1276_o_at  | <i>RBPMS</i>    | RNA-binding protein gene with multiple splicing                                                                 | 11030 | Chr:8p12-p11        | 1.1474 | 9  | 1.1467  |
| D50683_at       | 1816_s_at  | <i>TGFBR2</i>   | transforming growth factor, beta receptor II (70/80kDa)                                                         | 7048  | Chr:3p22            | 1.147  | NA | NA      |
| L36051_at       | 37480_at   | <i>THPO</i>     | thrombopoietin (myeloproliferative leukemia virus oncogene ligand, megakaryocyte growth and development factor) | 7066  | Chr:3q27            | 1.1444 | 5  | 0.93328 |
| L48692_at       | 33720_at   | <i>LOC56902</i> | putative 28 kDa protein                                                                                         | 56902 | Chr:2p13.2          | 1.143  | NA | NA      |
| M62783_at       | 36607_at   | <i>NAGA</i>     | N-acetylgalactosaminidase, alpha-                                                                               | 4668  | Chr:22q13-qter      | 1.1406 | 13 | 1.1605  |
| D87438_at       | 40765_at   | <i>KIAA0251</i> | KIAA0251 protein                                                                                                | 23042 | Chr:16              | 1.1385 | 11 | 1.095   |
| D87075_at       | 38122_at   | <i>SLC23A1</i>  | solute carrier family 23 (nucleobase transporters), member 1                                                    | 9982  | Chr:20p13           | 1.1385 | 11 | 1.1586  |
| U72206_at       | 40100_at   | <i>ARHGGEF2</i> | rho/rac guanine nucleotide exchange factor (GEF) 2                                                              | 9181  | Chr:1q21-q22        | 1.1381 | 10 | 1.1467  |
| U08316_at       | 33229_at   | <i>RPS6KA3</i>  | ribosomal protein S6 kinase, 90kDa, polypeptide 3                                                               | 6197  | Chr:3q22.2-q22.1    | 1.1381 | 6  | 1.1112  |
| U49742_at       | 32876_s_at | <i>RHO</i>      | rhodopsin (opsin 2, rod pigment) (retinitis pigmentosa 4, autosomal dominant)                                   | 6010  | Chr:3q21-q24        | 1.1372 | NA | NA      |
| U04270_at       | 38858_at   | <i>KCNH2</i>    | potassium voltage-gated channel, subfamily H (eag-related), member 2                                            | 3757  | Chr:7q35-q36        | 1.1371 | 6  | 1.0118  |
| AJ000099_s_at   | 37042_at   | <i>HYAL2</i>    | hyaluronoglucosaminidase 2                                                                                      | 8692  | Chr:3p21.3          | 1.1369 | 9  | 1.1459  |
| U25956_at       | 37541_at   | <i>SELPLG</i>   | selectin P ligand                                                                                               | 6404  | Chr:12q24           | 1.1368 | 11 | 1.2841  |
| U43185_s_at     | 506_s_at   | <i>STAT5A</i>   | signal transducer and activator of transcription 5A                                                             | 6776  | Chr:17q11.2         | 1.1357 | 7  | 1.0508  |
| D50550_at       | 33201_at   | <i>LLGL1</i>    | lethal giant larvae homolog 1 (Drosophila)                                                                      | 3996  | Chr:17p11.2         | 1.1348 | NA | NA      |

|             |            |          |                                                                                                        |       |                     |        |     |         |
|-------------|------------|----------|--------------------------------------------------------------------------------------------------------|-------|---------------------|--------|-----|---------|
| S50017_s_at | 39769_at   | CNP      | 2',3'-cyclic nucleotide 3' phosphodiesterase                                                           | 1267  | Chr:17q21           | 1.1338 | 8   | 1.0488  |
| J02758_s_at | 34523_at   | APOA4    | apolipoprotein A-IV                                                                                    | 337   | Chr:11q23           | 1.1329 | 7   | 1.0211  |
| U49395_at   | 40396_at   | P2RX5    | purinergic receptor P2X, ligand-gated ion channel, 5                                                   | 5026  | Chr:17p13           | 1.1329 | NA  | NA      |
| D86979_at   | 31468_s_at | KIAA0226 | KIAA0226 gene product                                                                                  | 9711  | Chr:3q29            | 1.1327 | 9   | 1.1164  |
| X65977_at   | 34546_at   | DEFEN4   | defensin, alpha 4, corticostatin                                                                       | 16689 | Chr:8p23            | 1.1327 | 10  | 1.094   |
| U15085_at   | 41609_at   | HLA-DMB  | major histocompatibility complex, class II, DM beta                                                    | 3109  | Chr:6p21.3          | 1.1322 | 11  | 1.3712  |
| X62573_at   | 34665_g_at | FCGR2B   | Fc fragment of IgG, low affinity IIb, receptor for (CD32)                                              | 2213  | Chr:1q23            | 1.1314 | NA  | NA      |
| D82346_at   | 36064_at   | KCNQ2    | potassium voltage-gated channel, KQT-like subfamily, member 2                                          | 3785  | Chr:20q13.3         | 1.1313 | NA  | NA      |
| X15331_s_at | 36490_s_at | PRPS1    | phosphoribosyl pyrophosphate synthetase 1                                                              | 5631  | Chr:Xq21-q27        | 1.131  | 9   | 1.1249  |
| AB000114_at | 41031_at   | OMB      | osteomodulin                                                                                           | 4958  | Chr:9q22.1          | 1.13   | 7   | 0.99265 |
| S80335_at   | 2019_s_at  | ITGB7    | integrin, beta 7                                                                                       | 3695  | Chr:12q13.13        | 1.1299 | NA  | NA      |
| X85545_at   | 16026_at   | PRKX     | protein kinase, X-linked                                                                               | 5613  | Chr:Xq22.3          | 1.1297 | 10  | 1.0923  |
| U58046_s_at | 32785_at   | EIF3S10  | eukaryotic translation initiation factor 3, subunit 10 theta, 150/170kDa                               | 8661  | Chr:10q26           | 1.1295 | NA  | NA      |
| X66079_at   | 35883_at   | SP1B     | Sp1-B transcription factor (Sp1-1/PU.1 related)                                                        | 6689  | Chr:19q13.3-q13.4   | 1.1286 | 11  | 1.1917  |
| U70987_at   | 34433_at   | DOK1     | docking protein 1, 62kDa (downstream of tyrosine kinase 1)                                             | 1796  | Chr:2p13            | 1.1286 | 10  | 1.0629  |
| Z26634_at   | 39850_at   | ANK2     | ankyrin 2, neuronal                                                                                    | 287   | Chr:4q25-q27        | 1.1275 | NA  | NA      |
| U70987_at   | 816_a_at   | DOK1     | docking protein 1, 62kDa (downstream of tyrosine kinase 1)                                             | 1796  | Chr:2p13            | 1.1267 | 10  | 1.0629  |
| S50017_s_at | 612_s_at   | CNP      | 2',3'-cyclic nucleotide 3' phosphodiesterase                                                           | 1267  | Chr:17q21           | 1.1261 | 8   | 1.0488  |
| U89896_at   | 447_s_at   | CSNK1G2  | casein kinase 1, gamma 2                                                                               | 1455  | Chr:19p13.3         | 1.1253 | 10  | 1.1142  |
| L26081_at   | 33461_at   | SEMA3A   | sema domain, immunoglobulin domain (Ig), short basic domain, secreted, (semaphorin) 3A                 | 10371 | Chr:7p12.1          | 1.1244 | 10  | 1.2799  |
| Y09305_at   | 101_at     | DYRK4    | dual-specificity tyrosine-(Y)-phosphorylation regulated kinase 4                                       | 8798  | Chr:12p13.32        | 1.1225 | 8   | 1.1179  |
| M27533_s_at | 35015_at   | CD80     | CD80 antigen (CD28 antigen ligand 1, B7-1 antigen)                                                     | 941   | Chr:3q13.3-q21      | 1.1215 | 6   | 1.0051  |
| D38537_s_at | 37098_at   | PPOX     | protoporphyrinogen oxidase                                                                             | 5498  | Chr:1q22            | 1.1195 | 10  | 1.1031  |
| U36221_at   | 40003_at   | GP2      | glycoprotein 2 (zymogen granule membrane)                                                              | 2813  | Chr:9q21.11-q21.2   | 1.1189 | 9   | 1.0438  |
| M32886_at   | 39055_at   | SRJ      | sorcin                                                                                                 | 6717  | Chr:7q21.1          | 1.1184 | NA  | NA      |
| L22218_at   | 646_s_at   | CLK2     | CLK-like kinase 2                                                                                      | 1196  | Chr:1q21            | 1.1168 | NA  | NA      |
| U32315_at   | 38381_at   | STX3A    | syntaxin 3A                                                                                            | 6809  | Chr:11q12.1         | 1.1167 | NA  | NA      |
| Z49878_at   | 37602_at   | GAMT     | guanidinoacetate N-methyltransferase                                                                   | 2593  | Chr:19p13.3         | 1.116  | 9   | 1.144   |
| X76057_at   | 36673_at   | MPI      | mannose phosphate isomerase                                                                            | 4351  | Chr:15q22-qter      | 1.1151 | 11  | 1.1613  |
| D87452_at   | 36154_at   | IHPK1    | inositol hexaphosphate kinase 1                                                                        | 9807  | Chr:3p21.31         | 1.1149 | NA  | NA      |
| U82467_at   | 34599_at   | TUB      | tubby homolog (mouse)                                                                                  | 7275  | Chr:1p15.5          | 1.1144 | NA  | NA      |
| AF000234_at | 38332_at   | P2RX4    | purinergic receptor P2X, ligand-gated ion channel, 4                                                   | 5025  | Chr:12q24.32        | 1.1142 | NA  | NA      |
| M82827_s_at | 38787_at   | FMJL     | promyelocytic leukemia                                                                                 | 5371  | Chr:15q21           | 1.1127 | NA  | NA      |
| U56327_s_at | 566_s_at   | PVL      | promyelocytic leukemia                                                                                 | 5371  | Chr:15q22           | 1.1123 | NA  | NA      |
| D50912_at   | 40070_at   | RBM10    | RNA binding motif protein 10                                                                           | 8241  | Chr:Xp11.23         | 1.1123 | 9   | 1.1264  |
| L43575_s_at | 40815_g_at | IDS      | iduronate 2-sulfatase (Hunter syndrome)                                                                | 3423  | Chr:Xq28            | 1.1119 | NA  | NA      |
| S49592_s_at | 1322_at    | E2F1     | E2F transcription factor 1                                                                             | 1869  | Chr:20q11.2         | 1.1096 | 6   | 1.033   |
| Z34822_f_at | 33623_g_at | CACNA1C  | calcium channel, voltage-dependent, L type, alpha 1C subunit                                           | 775   | Chr:12p13.3         | 1.1095 | 8   | 1.006   |
| M96684_at   | 35221_at   | PURA     | purine-rich element binding protein A                                                                  | 5813  | Chr:9q31            | 1.1094 | 8   | 1.0449  |
| X82055_at   | 794_at     | PTFN6    | protein tyrosine phosphatase, non-receptor type 6                                                      | 5777  | Chr:12p13           | 1.109  | NA  | NA      |
| U50327_s_at | 38711_at   | PRKCSH   | protein kinase C substrate 80K-H                                                                       | 5589  | Chr:19p13.1-p13.2   | 1.109  | 10  | 1.1014  |
| L22005_at   | 1274_s_at  | CDC34    | cell division cycle 34                                                                                 | 997   | Chr:19p13.3         | 1.1085 | NA  | NA      |
| D63940_s_at | 39072_at   | MX1      | MAX interacting protein 1                                                                              | 4601  | Chr:10q24-q25       | 1.1082 | 10  | 1.0613  |
| Z49205_at   | 33460_at   | P2RY1    | purinergic receptor P2Y, G-protein coupled, 1                                                          | 5028  | Chr:3q25.1          | 1.1077 | 7   | 1.0549  |
| U15932_at   | 529_at     | DUSP5    | dual specificity phosphatase 5                                                                         | 1847  | Chr:10q25           | 1.1072 | 12  | 1.2066  |
| U31248_at   | 38179_at   | ZNF174   | zinc finger protein 174                                                                                | 7727  | Chr:16p13.3         | 1.1067 | 9   | 1.0095  |
| U02657_at   | 34553_at   | FLJ73    | fms-related tyrosine kinase 3                                                                          | 2322  | Chr:13q12           | 1.1049 | 6   | 1.0074  |
| L07868_at   | 1722_at    | ERBB4    | erbB4 erythroblastic leukemia viral oncogene homolog 4 (avian)                                         | 1628  | Chr:2q33.2-q34      | 1.1038 | 8   | 1.0369  |
| U08316_at   | 865_at     | RPS6KA3  | ribosomal protein S6 kinase, 90kDa, polypeptide 3                                                      | 6197  | Chr:Xp22.2-p22.1    | 1.1033 | 8   | 1.1112  |
| X03663_at   | 160022_at  | CSF1R    | colony stimulating factor 1 receptor, formerly McDonough feline sarcoma viral (v-fms) oncogene homolog | 1436  | Chr:5q33-q35        | 1.1025 | 11  | 1.2492  |
| U87309_at   | 41217_at   | VPS41    | vacuolar protein sorting 41 (yeast)                                                                    | 27072 | Chr:7p14-p13        | 1.1023 | 10  | 1.026   |
| M31724_at   | 588_at     | PTPN1    | protein tyrosine phosphatase, non-receptor type 1                                                      | 5770  | Chr:20q13.1-q13.2   | 1.1016 | 9   | 1.0477  |
| D78011_at   | 41422_at   | DPYS     | dihydropyrimidinase                                                                                    | 1807  | Chr:8q22            | 1.1016 | 8   | 0.94024 |
| D86979_at   | 31802_at   | KIAA0226 | KIAA0226 gene product                                                                                  | 9711  | Chr:3q29            | 1.1015 | 9   | 1.1164  |
| U48213_at   | 40273_at   | DSP      | D site of albumin promoter (albumin D-box) binding protein                                             | 1628  | Chr:19q13.3         | 1.1014 | NA  | NA      |
| X56687_s_at | 38794_at   | UBTF     | upstream binding transcription factor, RNA polymerase I                                                | 7343  | Chr:17q21.3         | 1.0996 | 11  | 1.0653  |
| X63097_at   | 37164_at   | RHD      | Rhesus blood group, D antigen                                                                          | 6007  | Chr:1p36.11         | 1.097  | 6   | 1.0065  |
| D63880_at   | 35314_at   | CNAP1    | chromosome condensation-related SMC-associated protein 1                                               | 9918  | Chr:12p13.3         | 1.0968 | 6   | 0.9484  |
| U71087_at   | 41230_at   | MAP2K5   | mitogen-activated protein kinase kinase 5                                                              | 5607  | Chr:15q22.2         | 1.0967 | 9   | 1.0342  |
| X52773_at   | 405_at     | XRRA     | retinoid X receptor, alpha                                                                             | 6256  | Chr:9q34.3          | 1.0963 | NA  | NA      |
| L28957_at   | 39285_at   | PCYT1A   | phosphate cytidylyltransferase 1, choline, alpha isoform                                               | 5130  | Chr:3q29            | 1.0962 | 10  | 1.0453  |
| L36870_at   | 1845_at    | MAP2K4   | mitogen-activated protein kinase kinase 4                                                              | 6416  | Chr:17p11.2         | 1.0955 | 8   | 1.0608  |
| U48251_at   | 37116_at   | PRKCBP1  | protein kinase C binding protein 1                                                                     | 23613 | Chr:20q13.12        | 1.0952 | 7   | 0.99102 |
| L07261_s_at | 32146_s_at | ADD1     | adducin 1 (alpha)                                                                                      | 118   | Chr:4p16.3          | 1.0927 | NA  | NA      |
| U42390_at   | 40792_s_at | TRIO     | triple functional domain (PTPRF interacting)                                                           | 7204  | Chr:5p15.1-p14      | 1.0912 | 7   | 1.0186  |
| U53446_at   | 479_at     | DAB2     | disabled homolog 2, mitogen-responsive phosphoprotein (Drosophila)                                     | 1601  | Chr:5p13            | 1.091  | NA  | NA      |
| U49857_at   | 40484_g_at | CROCC1   | transcriptional activator of the c-fos promoter                                                        | 10485 | Chr:1q21.3          | 1.0897 | 11  | 1.029   |
| D16227_at   | 35693_at   | HPCAL1   | hippocalcin-like 1                                                                                     | 3241  | Chr:2p25.1          | 1.0853 | NA  | NA      |
| M57399_at   | 234_s_at   | PTN      | pleiotrophin (heparin binding growth factor 8, neurite growth-promoting factor 1)                      | 5784  | Chr:7q33-q34        | 1.0849 | 9   | 1.0345  |
| U82467_at   | 34600_s_at | TUB      | tubby homolog (mouse)                                                                                  | 7275  | Chr:1p15.5          | 1.0843 | NA  | NA      |
| M31328_at   | 40351_at   | GNB3     | guanine nucleotide binding protein (G protein), beta polypeptide 3                                     | 2784  | Chr:12p13           | 1.0833 | NA  | NA      |
| D26156_s_at | 32579_at   | SMARCA4  | SWI/SNF related, matrix associated, actin dependent regulator of chromatin, subfamily a, member 4      | 6597  | Chr:19p13.13        | 1.0825 | 8   | 1.0132  |
| X16316_at   | 34481_at   | VAV1     | vav 1 oncogene                                                                                         | 7409  | Chr:19p13.2         | 1.0822 | 10  | 1.3275  |
| U67733_at   | 31904_at   | PDE2A    | phosphodiesterase 2A, cGMP-stimulated                                                                  | 5138  | Chr:11q13.2         | 1.082  | 9   | 1.0306  |
| X87767_at   | 38868_at   | FCAR     | Fc fragment of IgA, receptor for                                                                       | 2204  | Chr:19q13.2-q13.4   | 1.0811 | NA  | NA      |
| U86559_at   | 38543_at   | ALK      | anaplastic lymphoma kinase (KIF-1)                                                                     | 2348  | Chr:2p23            | 1.0808 | 7   | 0.9827  |
| U07132_at   | 519_g_at   | NR1H2    | nuclear receptor subfamily 1, group H, member 2                                                        | 7376  | Chr:19q13.3-19q13.3 | 1.0792 | 9   | 1.0312  |
| M38258_at   | 1587_at    | RARG     | retinoic acid receptor, gamma                                                                          | 5916  | Chr:12q13           | 1.0728 | 5   | 0.99762 |
| Y00414_s_at | 32300_s_at | TH       | tyrosine hydroxylase                                                                                   | 7054  | Chr:1p15.5          | 1.0705 | 7   | 0.98759 |
| U34605_at   | 1046_at    | R158     | retinoic acid- and interferon-inducible protein (58kD)                                                 | 24138 | Chr:10q23.31        | 1.0702 | 8   | 1.053   |
| M29335_at   | 31728_at   | ---      | MHC DO-alpha cell surface glycoprotein, mRNA sequence                                                  | ---   | ---                 | 1.0678 | --- | ---     |
| L09230_s_at | 1128_s_at  | CCR1     | chemokine (C-C motif) receptor 1                                                                       | 1230  | Chr:3p21            | 1.0632 | 9   | 1.0329  |
| M38258_at   | 1132_s_at  | RARG     | retinoic acid receptor, gamma                                                                          | 5916  | Chr:12q13           | 1.0583 | 5   | 0.99762 |
| L17327_at   | 35596_at   | MGC11271 | hypothetical protein MGC11271                                                                          | 79173 | Chr:19p13.12        | 1.0499 | 7   | 1.0304  |

#### Genes with P > M in 14/14 Cases, Full Model

| Probe Set        | Probe Set        | Gene Symbol | Title                           | Location | Avg Negative Fold Change | #P>M Pseudo-probe Sets | Avg. Negative Fold Pseudo-probe Sets |
|------------------|------------------|-------------|---------------------------------|----------|--------------------------|------------------------|--------------------------------------|
| Hu6800 Probe Set | U95Av2 Probe Set | <b>FZD5</b> | frizzled homolog 5 (Drosophila) | 7855     | -1.2855                  | NA                     | NA                                   |

#### Genes with P > M in 14/14 Cases, Full Model

| Probe Set        | Probe Set        | Gene Symbol   | Title                                               | Location | Avg Negative Fold Change | #P>M Pseudo-probe Sets | Avg. Negative Fold Pseudo-probe Sets |
|------------------|------------------|---------------|-----------------------------------------------------|----------|--------------------------|------------------------|--------------------------------------|
| Hu6800 Probe Set | U95Av2 Probe Set | <b>MYL1</b>   | myosin, light polypeptide 1, alkali; skeletal, fast | 4632     | -4.2466                  | 12                     | -6.1838                              |
| M20642_s_at      | 40157_s_at       | <b>MT2A</b>   | metallothionein 2A                                  | 4502     | -1.5118                  | NA                     | NA                                   |
| V00594_s_at      | 39081_at         | <b>ATP1B3</b> | ATPase, Na+/K+ transporting, beta 3 polypeptide     | 483      | -1.4641                  | 12                     | -1.3759                              |

|             |            |              |                                              |      |                   |         |    |         |
|-------------|------------|--------------|----------------------------------------------|------|-------------------|---------|----|---------|
| J03242_s_at | 36782_s_at | <i>IGF2</i>  | insulin-like growth factor 2 (somatomedin A) | 3481 | Chr:11p15.5       | -1.3885 | 11 | -1.1135 |
| U72761_at   | 39028_at   | <i>KPNB3</i> | karyopherin (importin) beta 3                | 3843 | Chr:13q32.2       | -1.2621 | NA | NA      |
| D49372_s_at | 40008_at   | <i>CCL11</i> | chemokine (C-C motif) ligand 11              | 6356 | Chr:17q21.1-q21.2 | -1.2086 | 11 | -1.2828 |

### Genes with P > M in 12/14 Cases, Full Model

| Hu6800 Probe Set | U95Av2 Probe Set | Gene Symbol      | Title                                                                                  | LocustLink | Location          | Avg Negative Fold Change | #P>M Pseudo-probe Sets | Avg. Negative Fold Pseudo-probe Sets |
|------------------|------------------|------------------|----------------------------------------------------------------------------------------|------------|-------------------|--------------------------|------------------------|--------------------------------------|
| M20642_s_at      | 40158_r_at       | <i>MYL1</i>      | myosin, light polypeptide 1, alkali; skeletal, fast                                    | 4632       | Chr:2q33-q34      | -4.589                   | 12                     | -6.1838                              |
| X90568_at        | 40795_at         | <i>TTN</i>       | titin                                                                                  | 7273       | Chr:2q24.3        | -2.327                   | NA                     | NA                                   |
| S73840_at        | 39101_at         | <i>MYH2</i>      | myosin, heavy polypeptide 2, skeletal muscle, adult                                    | 4620       | Chr:17p13.1       | -2.9306                  | NA                     | NA                                   |
| X66141_at        | 36640_at         | <i>MYL2</i>      | myosin, light polypeptide 2, regulatory, cardiac, slow                                 | 4633       | Chr:12q23-q24.3   | -2.0088                  | NA                     | NA                                   |
| M24069_at        | 39839_at         | <i>CSDA</i>      | cold shock domain protein A                                                            | 8531       | Chr:12p13.1       | -1.5549                  | NA                     | NA                                   |
| M33772_s_at      | 41748_at         | <i>TNNC2</i>     | troponin C2, fast                                                                      | 7125       | Chr:20q12-q13.11  | -1.551                   | 12                     | -2.0314                              |
| X53356_rna1_at   | 33411_g_at       | <i>ITGA6</i>     | integrin, alpha 6                                                                      | 3655       | Chr:2q31.1        | -1.5346                  | 11                     | -1.3683                              |
| X64177_f_at      | 39594_f_at       | <i>MT1H</i>      | metallothionein 1H                                                                     | 4496       | Chr:16q13         | -1.5339                  | 12                     | -1.2029                              |
| X53586_rna1_at   | 33410_at         | <i>ITGA6</i>     | integrin, alpha 6                                                                      | 3655       | Chr:2q31.1        | -1.524                   | 11                     | -1.3683                              |
| V00594_at        | 39081_at         | <i>MT2A</i>      | metallothionein 2A                                                                     | 4502       | Chr:16q13         | -1.5128                  | NA                     | NA                                   |
| X53586_rna1_at   | 41266_at         | <i>ITGA6</i>     | integrin, alpha 6                                                                      | 3655       | Chr:2q31.1        | -1.4895                  | 11                     | -1.3683                              |
| U59289_at        | 483_g_at         | <i>CDH13</i>     | cadherin 13, H-cadherin (heart)                                                        | 1012       | Chr:16q24.2-q24.3 | -1.4678                  | NA                     | NA                                   |
| U96094_at        | 39789_at         | <i>SLN</i>       | sarcolipin                                                                             | 6588       | Chr:11q22-q23     | -1.4632                  | 12                     | -1.9922                              |
| S95936_at        | 32538_at         | <i>TF</i>        | transferin                                                                             | 7018       | Chr:3q21          | -1.4555                  | 11                     | -1.1293                              |
| U16261_at        | 41849_r_at       | <i>IL24</i>      | interleukin 24                                                                         | 11009      | Chr:1q32          | -1.3872                  | 9                      | -1.1517                              |
| Z38133_s_at      | 34471_at         | <i>MYH8</i>      | myosin, heavy polypeptide 8, skeletal muscle, perinatal                                | 4626       | Chr:17p13.1       | -1.3752                  | 11                     | -2.3099                              |
| X69910_at        | 32529_at         | <i>CKAP4</i>     | cytoskeleton-associated protein 4                                                      | 10970      | Chr:12q24.11      | -1.3685                  | 10                     | -1.2487                              |
| U62801_at        | 37554_at         | <i>KLK6</i>      | kallikrein 6 (neurosin, zyme)                                                          | 5653       | Chr:19q13.3       | -1.3528                  | 12                     | -1.5558                              |
| J02611_at        | 36681_at         | <i>APOD</i>      | apolipoprotein D                                                                       | 347        | Chr:3q26.2-qter   | -1.3182                  | 9                      | -1.3309                              |
| M21812_at        | 34881_at         | <i>HUMMLC2B</i>  | (clone PWHL2-24) myosin light chain 2                                                  | 29895      | Chr:16p11.2       | -1.3022                  | 9                      | NA                                   |
| M74542_at        | 40031_at         | <i>ALDH3A1</i>   | aldehyde dehydrogenase 3 family, member A1                                             | 218        | Chr:17p11.2       | -1.2701                  | 9                      | -1.1676                              |
| U37359_at        | 39233_at         | <i>MRE11A</i>    | MRE11 meiotic recombination 11 homolog A (S. cerevisiae)                               | 4361       | Chr:11q21         | -1.2519                  | NA                     | NA                                   |
| M18533_at        | 40488_at         | <i>DMD</i>       | dystrophin (muscular dystrophy, Duchenne and Becker types)                             | 1756       | Chr:Xp21.2        | -1.2535                  | 10                     | -1.1305                              |
| M85164_at        | 38496_at         | <i>ELK4</i>      | ELK4, ETS-domain protein (SRF accessory protein 1)                                     | 2005       | Chr:1q32          | -1.2132                  | 11                     | -1.1464                              |
| M19154_at        | 971_s_at         | <i>TGFB2</i>     | transforming growth factor, beta 2                                                     | 7042       | Chr:10q41         | -1.2034                  | NA                     | NA                                   |
| X81372_at        | 40912_s_at       | <i>BPHL</i>      | bipheryl hydrolase-like (serine hydrolase; breast epithelial mucin-associated antigen) | 670        | Chr:6p25          | -1.2023                  | NA                     | NA                                   |
| L38503_at        | 1099_s_at        | <i>GSTT2</i>     | glutathione S-transferase theta 2                                                      | 2953       | Chr:22q11.23      | -1.1995                  | NA                     | NA                                   |
| U61836_at        | 1650_g_at        | <i>C20orf16</i>  | chromosome 20 open reading frame 16                                                    | 54498      | Chr:20p13         | -1.1523                  | 10                     | -1.1524                              |
| S95936_at        | 32538_at         | <i>RPS27A</i>    | ribosomal protein S27a                                                                 | 34570      | Chr:12p16         | -1.1533                  | NA                     | NA                                   |
| D13645_at        | 34765_at         | <i>KIAA0020</i>  | KIAA0020 gene product                                                                  | 9933       | Chr:9p24.2        | -1.1819                  | 11                     | -1.1142                              |
| M19481_at        | 38356_at         | <i>FST</i>       | folistatin                                                                             | 10468      | Chr:5q11.2        | -1.1807                  | 9                      | -1.3437                              |
| M94167_at        | 209_at           | <i>NRG1</i>      | neuregulin 1                                                                           | 3084       | Chr:8p21-p12      | -1.1773                  | NA                     | NA                                   |
| U26591_at        | 32634_s_at       | <i>ICA1</i>      | islet cell autoantigen 1, 69kDa                                                        | 3382       | Chr:7p22          | -1.1762                  | NA                     | NA                                   |
| X76302_at        | 35286_r_at       | <i>RY1</i>       | putative nucleic acid binding protein RY-1                                             | 11017      | Chr:2p13.1        | -1.1734                  | 5                      | -0.94862                             |
| U12139_at        | 37892_at         | <i>COL11A1</i>   | collagen, type XI, alpha 1                                                             | 1301       | Chr:1p21          | -1.1604                  | 8                      | -1.0264                              |
| U82256_at        | 32722_at         | <i>ARG2</i>      | arginase, type II                                                                      | 32722      | Chr:16q21.1-q24.3 | -1.1598                  | 7                      | -0.99319                             |
| J03242_s_at      | 1591_s_at        | <i>IGF2</i>      | insulin-like growth factor 2 (somatomedin A)                                           | 3481       | Chr:11p15.5       | -1.1586                  | 11                     | -1.1135                              |
| U59748_at        | 485_at           | <i>DHH</i>       | desert hedgehog homolog (Drosophila)                                                   | 50846      | Chr:12a12-q13.1   | -1.1574                  | 8                      | -1.078                               |
| J02843_at        | 40379_at         | <i>CYP2E1</i>    | cytochrome P450, subfamily IIE (ethanol-inducible), polypeptide 1                      | 1571       | Chr:10q24.3-qter  | -1.1556                  | 9                      | -1.0985                              |
| U13220_at        | 36319_at         | <i>FOXF2</i>     | forkhead box F2                                                                        | 2295       | Chr:6p25.3        | -1.1513                  | 10                     | -1.2121                              |
| U26591_at        | 32633_at         | <i>ICA1</i>      | islet cell autoantigen 1, 69kDa                                                        | 3382       | Chr:7p22          | -1.1499                  | NA                     | NA                                   |
| U59504_at        | 39521_at         | <i>SLC12A4</i>   | solute carrier family 12 (potassium/chloride transporters), member 4                   | 6560       | Chr:16q22.1       | -1.1411                  | 10                     | -1.1074                              |
| U37359_at        | 32869_at         | <i>MRE11A</i>    | MRE11 meiotic recombination 11 homolog A (S. cerevisiae)                               | 4361       | Chr:11q21         | -1.136                   | NA                     | NA                                   |
| U30888_at        | 36982_at         | <i>USP14</i>     | ubiquitin specific protease 14 (RNA-guanine transglycosylase)                          | 9097       | Chr:18p11.32      | -1.1213                  | NA                     | NA                                   |
| U15008_at        | 35270_at         | <i>SNRPD2</i>    | small nuclear ribonucleoprotein D2 polypeptide 16.5kDa                                 | 6633       | Chr:19q13.2       | -1.1194                  | 8                      | -1.0677                              |
| X9699_at         | 35583_at         | <i>HSX1APAF1</i> | XIAP associated factor-1                                                               | 54739      | Chr:17p13.2       | -1.1189                  | NA                     | NA                                   |
| S83309_s_at      | 35873_at         | <i>NR6A1</i>     | nuclear receptor subfamily 6, group A, member 1                                        | 2649       | Chr:9q33-q34.1    | -1.1063                  | 4                      | -0.96712                             |
| U61836_at        | 1649_at          | <i>C20orf16</i>  | chromosome 20 open reading frame 16                                                    | 54498      | Chr:20p13         | -1.0821                  | 10                     | -1.1524                              |
| U50531_at        | 1528_at          | <i>CG030</i>     | hypothetical gene CG030                                                                | 116828     | Chr:13q12-q13     | -1.0783                  | NA                     | NA                                   |

### Genes with P > M in 11/14 Cases, Full Model

| Hu6800 Probe Set | U95Av2 Probe Set | Gene Symbol     | Title                                                                           | LocustLink | Location          | Avg Negative Fold Change | #P>M Pseudo-probe Sets | Avg. Negative Fold Pseudo-probe Sets |
|------------------|------------------|-----------------|---------------------------------------------------------------------------------|------------|-------------------|--------------------------|------------------------|--------------------------------------|
| U35637_s_at      | 38461_at         | <i>NEB</i>      | nebulin                                                                         | 4703       | Chr:2q22          | -2.9512                  | 11                     | -2.6516                              |
| X53961_at        | 37149_s_at       | <i>LTF</i>      | lactotransferrin                                                                | 4057       | Chr:3q21-q23      | -2.7714                  | 10                     | -2.7007                              |
| X51441_at        | 33272_at         | <i>SAA1</i>     | serum amyloid A1                                                                | 6288       | Chr:11p15.1       | -2.5386                  | 11                     | -2.2851                              |
| X05232_at        | 437_at           | <i>MMP3</i>     | matrix metalloproteinase 3 (stromelysin 1, progelatinase)                       | 4314       | Chr:11q22.3       | -2.3736                  | NA                     | NA                                   |
| X51441_s_at      | 33272_at         | <i>SAA1</i>     | serum amyloid A1                                                                | 6288       | Chr:11p15.1       | -2.3024                  | 11                     | -2.2851                              |
| M69225_at        | 40304_at         | <i>BPAG1</i>    | bullous pemphigoid antigen 1, 230/240kDa                                        | 667        | Chr:6p12-p11      | -2.2511                  | NA                     | NA                                   |
| L20861_at        | 31862_at         | <i>WNT5A</i>    | wingless-type MMTV integration site family, member 5A                           | 7474       | Chr:3p21-p14      | -2.2151                  | 9                      | -1.2866                              |
| J00073_at        | 39063_at         | <i>ACTC</i>     | actin, alpha, cardiac muscle                                                    | 70         | Chr:15q11-q14     | -2.0703                  | 11                     | -6.018                               |
| M69225_at        | 32782_r_at       | <i>BPAG1</i>    | bullous pemphigoid antigen 1, 230/240kDa                                        | 667        | Chr:6p12-p11      | -2.0523                  | NA                     | NA                                   |
| Y00787_s_at      | 35372_r_at       | <i>IL8</i>      | interleukin 8                                                                   | 3576       | Chr:4q13-q21      | -2.0136                  | 10                     | -1.309                               |
| Y07755_at        | 35726_at         | <i>S100A2</i>   | S100 calcium binding protein A2                                                 | 6273       | Chr:1q21          | -2.0042                  | NA                     | NA                                   |
| L24564_at        | 39528_at         | <i>RRAD</i>     | Ras-related associated with diabetes                                            | 6236       | Chr:16q22         | -1.9363                  | 11                     | -1.9528                              |
| X06661_at        | 36570_at         | <i>CALB1</i>    | calbindin 1, 28kDa                                                              | 793        | Chr:8q21.3-q22.1  | -1.8559                  | 9                      | -1.2002                              |
| M9169_s_at       | 41618_at         | <i>COL17A1</i>  | collagen, type XVII, alpha 1                                                    | 1308       | Chr:10q24.3       | -1.8089                  | NA                     | NA                                   |
| U02081_at        | 33894_at         | <i>NET1</i>     | neuroepithelial cell transforming gene 1                                        | 10276      | Chr:10p15         | -1.7926                  | 11                     | NA                                   |
| X06825_at        | 32312_at         | <i>TPM2</i>     | tropomyosin 2 (beta)                                                            | 7169       | Chr:9p13.2-p13.1  | -1.7862                  | 5                      | -0.85549                             |
| U16261_at        | 41848_f_at       | <i>IL24</i>     | interleukin 24                                                                  | 11009      | Chr:1q32          | -1.7819                  | 9                      | -1.1517                              |
| M93056_at        | 33305_at         | <i>SERPINB1</i> | serine (or cysteine) proteinase inhibitor, clade B (ovalbumin), member 1        | 1992       | Chr:6p25          | -1.7538                  | 10                     | -1.321                               |
| M11433_at        | 38634_at         | <i>RBP1</i>     | retinol binding protein 1, cellular                                             | 5947       | Chr:3q23          | -1.7342                  | 11                     | -1.4675                              |
| X06825_at        | 32314_g_at       | <i>TPM2</i>     | tropomyosin 2 (beta)                                                            | 7169       | Chr:9p13.2-p13.1  | -1.7145                  | 5                      | -0.85549                             |
| X53377_at        | 35484_at         | <i>IL11</i>     | interleukin 11                                                                  | 3589       | Chr:18q12.3-q13.4 | -1.5896                  | 10                     | -1.201                               |
| L20861_at        | 1669_at          | <i>WNT5A</i>    | wingless-type MMTV integration site family, member 5A                           | 7474       | Chr:3p21-p14      | -1.5605                  | 9                      | -1.2866                              |
| U41060_at        | 1798_at          | <i>LIV-1</i>    | LIV-1 protein, estrogen regulated                                               | 25800      | Chr:18q12.1       | -1.5377                  | NA                     | NA                                   |
| M80244_at        | 32186_at         | <i>SLC7A5</i>   | solute carrier family 7 (cationic amino acid transporter, y+ system), member 5  | 8140       | Chr:16q24.3       | -1.5284                  | 11                     | -1.3865                              |
| U89916_at        | 39579_at         | <i>CLDN10</i>   | claudin 10                                                                      | 9071       | Chr:13q31-q34     | -1.5012                  | 11                     | -1.471                               |
| AF007875_at      | 34879_at         | <i>DPM1</i>     | dolichyl-phosphate mannosyltransferase polypeptide 1, catalytic subunit         | 8813       | Chr:20q13.13      | -1.4855                  | 13                     | -1.2799                              |
| S76638_at        | 40363_r_at       | <i>NFKB2</i>    | nuclear factor of kappa light polypeptide gene enhancer in B-cells 2 (p49/p100) | 4791       | Chr:10q24         | -1.471                   | 6                      | -0.9148                              |
| J03798_at        | 3749_s_at        | <i>SNRPD1</i>   | small nuclear ribonucleoprotein D1 polypeptide 16kDa                            | 6632       | Chr:19q11.1       | -1.4393                  | NA                     | NA                                   |
| M21665_s_at      | 39095_at         | <i>MYH7</i>     | myosin, heavy polypeptide 7, cardiac muscle, beta                               | 4625       | Chr:17p12         | -1.4341                  | 11                     | -2.0861                              |
| X83703_at        | 40374_at         | <i>CARP</i>     | cardiac ankyrin repeat protein                                                  | 27063      | Chr:10q23.31      | -1.4338                  | 11                     | -1.1775                              |
| X70940_s_at      | 35174_i_at       | <i>EEF1A2</i>   | eukaryotic translation elongation factor 1 alpha 2                              | 1917       | Chr:20q13.3       | -1.3843                  | 7                      | -1.2101                              |
| M37825_at        | 1732_at          | <i>FGF5</i>     | fibroblast growth factor 5                                                      | 2250       | Chr:4q21          | -1.3672                  | 11                     | -1.0913                              |
| U59289_at        | 482_at           | <i>CDH13</i>    | cadherin 13, H-cadherin (heart)                                                 | 1012       | Chr:16q24.2-q24.3 | -1.3578                  | NA                     | NA                                   |
| X77584_at        | 36992_at         | <i>TXN</i>      | thioredoxin                                                                     | 7295       | Chr:9q31          | -1.3505                  | NA                     | NA                                   |
| U59289_at        | 2073_s_at        | <i>CDH13</i>    | cadherin 13, H-cadherin (heart)                                                 | 1012       | Chr:16q24.2-q24.3 | -1.3504                  | NA                     | NA                                   |
| U58522_at        | 40121_at         | <i>HIP2</i>     | huntingtin interacting protein 2                                                | 3093       | Chr:4p14          | -1.3448                  | 10                     | -1.0486                              |

|                  |            |                 |                                                                                                 |        |                    |         |     |          |
|------------------|------------|-----------------|-------------------------------------------------------------------------------------------------|--------|--------------------|---------|-----|----------|
| X70940_s_at      | 35175_f_at | <i>EEF1A2</i>   | eukaryotic translation elongation factor 1 alpha 2                                              | 1917   | Chr:20q13.3        | -1.3419 | 7   | -1.2101  |
| X76717_at        | 39120_at   | <i>MT1L</i>     | metallothionein 1L                                                                              | 4500   | Chr:16q13          | -1.3261 | NA  | NA       |
| U20979_at        | 32589_at   | <i>CHAF1A</i>   | chromatin assembly factor 1, subunit A (p150)                                                   | 10036  | Chr:19p13.3        | -1.3252 | 6   | -1.0026  |
| X04500_at        | 39402_at   | <i>IL1B</i>     | interleukin 1, beta                                                                             | 3553   | Chr:2q14           | -1.3061 | 9   | -1.1963  |
| U34038_at        | 38247_at   | <i>FSPR1</i>    | coagulation factor II (thrombin) receptor-like 1                                                | 2150   | Chr:5q13           | -1.2969 | 9   | -1.0302  |
| S69189_at        | 40459_at   | <i>ACOX1</i>    | acyl-Coenzyme A oxidase 1, palmitoyl                                                            | 51     | Chr:17q24-17q25    | -1.2927 | NA  | NA       |
| U83410_at        | 37894_at   | <i>CUL2</i>     | culin 2                                                                                         | 8453   | Chr:10p11.21       | -1.2896 | NA  | NA       |
| U79242_at        | 37568_at   | ---             | Homo sapiens clone 24816 mRNA sequence                                                          | ---    | ---                | -1.2711 | --- | ---      |
| U90651_at        | 31853_at   | <i>EED</i>      | embryonic ectoderm development                                                                  | 8726   | Chr:11q14.2-q22.3  | -1.2702 | 11  | -1.111   |
| M19154_at        | 1262_s_at  | <i>TGFB2</i>    | transforming growth factor, beta 2                                                              | 7042   | Chr:11q14.2-q22.3  | -1.2586 | NA  | NA       |
| U26032_at        | 1154_at    | <i>EIF2S1</i>   | eukaryotic translation initiation factor 2, subunit 1 alpha, 35kDa                              | 1965   | Chr:14q23.3        | -1.2551 | 11  | -1.0619  |
| J04983_at        | 33986_r_at | <i>HSPD9</i>    | heat shock 90kDa protein 1, beta                                                                | 3326   | Chr:6p12           | -1.2531 | NA  | NA       |
| U30872_at        | 37302_at   | <i>CENPF</i>    | centromere protein F, 350/400kDa (mitotin)                                                      | 1063   | Chr:13q32-q41      | -1.2511 | 7   | -1.0288  |
| M82919_at        | 31817_at   | <i>GABRB3</i>   | gamma-aminobutyric acid (GABA) A receptor, beta 3                                               | 2562   | Chr:15q11.2-q12    | -1.2506 | 9   | -1.0633  |
| U17032_at        | 2029_at    | <i>ARHGAP5</i>  | Rho GTPase activating protein 5                                                                 | 394    | Chr:14q12          | -1.2492 | 9   | -1.0393  |
| U16954_at        | 36941_at   | <i>AF1Q</i>     | ALL1-fused gene from chromosome 1q                                                              | 10962  | Chr:1q21           | -1.2449 | NA  | NA       |
| M33653_at        | 38951_at   | <i>COL13A1</i>  | collagen, type XIII, alpha 1                                                                    | 1305   | Chr:10q22          | -1.2334 | 7   | -1.0245  |
| U11791_at        | 36086_at   | <i>CCHN</i>     | cyclin H                                                                                        | 902    | Chr:5q13.3-q14     | -1.2307 | 8   | -0.9987  |
| U67122_s_at      | 155_s_at   | <i>UBL1</i>     | ubiquitin-like 1 (sentrin)                                                                      | 7341   | Chr:2q33           | -1.2225 | 6   | -0.90909 |
| X78121_at        | 32867_at   | <i>CHM</i>      | choroideremia (Rab escort protein 1)                                                            | 1121   | Chr:Xq21.2         | -1.2213 | 10  | -1.0689  |
| M28209_at        | 34393_r_at | <i>RAB1A</i>    | RAB1A, member RAS oncogene family                                                               | 5861   | Chr:2p14           | -1.2209 | 8   | -1.066   |
| X60787_s_at      | 40477_r_at | <i>ILF1</i>     | interleukin enhancer binding factor 1                                                           | 3607   | Chr:17q25          | -1.2138 | 9   | -1.0412  |
| U64520_at        | 35783_at   | <i>VAMP3</i>    | vesicle-associated membrane protein 3 (cellubrevin)                                             | 9341   | Chr:1p36.22        | -1.2124 | NA  | NA       |
| U16261_at        | 41847_at   | <i>IL24</i>     | interleukin 24                                                                                  | 11009  | Chr:1q32           | -1.2106 | 9   | -1.1517  |
| X81198_at        | 34370_at   | ---             | Archain [Homo sapiens], mRNA sequence                                                           | ---    | ---                | -1.2105 | --- | ---      |
| U17374_at        | 37464_at   | <i>PEX13</i>    | peroxisome biogenesis factor 13                                                                 | 5194   | Chr:2p14-p16       | -1.2094 | NA  | NA       |
| X90392_at        | 37213_at   | <i>DNASE1L1</i> | deoxyribonuclease 1-like 1                                                                      | 1774   | Chr:Xq28           | -1.2087 | 6   | -0.97603 |
| Y13153_at        | 39559_at   | <i>KMO</i>      | kynurenine 3-monooxygenase (kynurenine 3-hydroxylase)                                           | 8564   | Chr:14q42-q44      | -1.208  | NA  | NA       |
| U19718_at        | 38442_at   | <i>MFAP2</i>    | microfibrillar-associated protein 2                                                             | 4237   | Chr:1p36.1-p35     | -1.2022 | 10  | -1.326   |
| X52611_s_at      | 32154_at   | <i>TFAP2A</i>   | transcription factor AP-2 alpha (activating enhancer binding protein 2 alpha)                   | 7020   | Chr:6p24           | -1.2004 | NA  | NA       |
| S79639_at        | 222_at     | <i>EXT1</i>     | exostosins (multiple) 1                                                                         | 2131   | Chr:8q24.11-q24.13 | -1.2001 | 11  | -1.2447  |
| U86755_s_at      | 1227_g_at  | <i>ADAM17</i>   | a disintegrin and metalloproteinase domain 17 (tumor necrosis factor, alpha, converting enzyme) | 6888   | Chr:2p25           | -1.1955 | 10  | -1.0119  |
| U26032_at        | 39784_at   | <i>UBP1</i>     | eukaryotic translation initiation factor 2, subunit 1 alpha, 35kDa                              | 1965   | Chr:14q23.3        | -1.194  | 10  | -1.0619  |
| M81882_at        | 32279_at   | <i>GAD2</i>     | glutamate decarboxylase 2 (pancreatic islets and brain, 65kDa)                                  | 2572   | Chr:10p11.23       | -1.1923 | 6   | -1.0102  |
| Z70723_at        | 38861_at   | <i>PON1</i>     | paraoxonase 1                                                                                   | 5444   | Chr:7q21.3         | -1.1896 | 9   | -1.0796  |
| X16135_at        | 35201_at   | <i>HNRPL</i>    | heterogeneous nuclear ribonucleoprotein L                                                       | 3191   | Chr:19q13.13       | -1.1875 | 11  | -1.0698  |
| X15675_at        | 35585_at   | ---             | Human pTR7 mRNA for repetitive sequence, mRNA sequence                                          | ---    | ---                | -1.1871 | --- | ---      |
| M85164_at        | 38497_at   | <i>ELK4</i>     | ELK4, ETS-domain protein (SRF accessory protein 1)                                              | 2005   | Chr:1q32           | -1.1869 | 11  | -1.1464  |
| M83822_at        | 35371_at   | <i>LRBA</i>     | LPS-responsive vesicle trafficking, beach and anchor containing                                 | 987    | Chr:4q31.22-q31.23 | -1.1849 | NA  | NA       |
| X83682_at        | 35243_at   | <i>PCTAIRE3</i> | PCTAIRE protein kinase 3                                                                        | 5129   | Chr:1q31-q32       | -1.1815 | NA  | NA       |
| D78367_at        | 34615_at   | <i>KRT12</i>    | keratin 12 (Meesmann corneal dystrophy)                                                         | 3869   | Chr:17q12          | -1.1814 | 6   | -1.0149  |
| S58544_at        | 36744_at   | <i>SPAG1</i>    | sperm associated antigen 1                                                                      | 6674   | Chr:8q22.2         | -1.1813 | 8   | -1.1244  |
| M11353_at        | 254_at     | <i>H3F3A</i>    | H3 histone, family 3A                                                                           | 3020   | Chr:1q41           | -1.1807 | 9   | -1.0502  |
| L04569_at        | 38002_s_at | <i>CACNA1C</i>  | calcium channel, voltage-dependent, L type, alpha 1C subunit                                    | 775    | Chr:12p13.3        | -1.1796 | 6   | -0.994   |
| U47101_at        | 39165_at   | <i>NIFU</i>     | nitrogen fixation cluster-like                                                                  | 23479  | Chr:12q24.1        | -1.1792 | 5   | -0.87975 |
| X52611_s_at      | 32155_at   | <i>TFAP2A</i>   | transcription factor AP-2 alpha (activating enhancer binding protein 2 alpha)                   | 7020   | Chr:6p24           | -1.1779 | NA  | NA       |
| U95006_at        | 35710_s_at | <i>MGC14480</i> | hypothetical protein MGC14480                                                                   | 201254 | Chr:17q25.3        | -1.1752 | 11  | -1.148   |
| U21561_at        | 38201_at   | <i>BCAT1</i>    | branched chain aminotransferase 1, cytosolic                                                    | 586    | Chr:12q12-q12      | -1.173  | 9   | -1.1128  |
| M94077_at        | 38851_at   | <i>LOR</i>      | loricrin                                                                                        | 4014   | Chr:1q21           | -1.1721 | NA  | NA       |
| U22376_cds2_s_at | 1471_at    | <i>MYB</i>      | v-myb myeloblastosis viral oncogene homolog (avian)                                             | 4602   | Chr:6q22-q23       | -1.17   | NA  | NA       |
| S74445_at        | 542_at     | <i>CRABP1</i>   | cellular retinoic acid binding protein 1                                                        | 1381   | Chr:15q24          | -1.1673 | 9   | -1.076   |
| D50487_at        | 744_at     | <i>DDX8</i>     | DEAD/H (Asp-Glu-Ala-Asp/His) box polypeptide 8 (RNA helicase)                                   | 1659   | Chr:17q21.31       | -1.1654 | 7   | -1.0217  |
| X52611_s_at      | 792_s_at   | <i>TFAP2A</i>   | transcription factor AP-2 alpha (activating enhancer binding protein 2 alpha)                   | 7020   | Chr:6p24           | -1.163  | NA  | NA       |
| M60314_at        | 1831_at    | <i>BMF5</i>     | bone morphogenetic protein 5                                                                    | 653    | Chr:6p12.1         | -1.1627 | 9   | -1.0772  |
| M61156_at        | 32154_at   | <i>TFAP2A</i>   | transcription factor AP-2 alpha (activating enhancer binding protein 2 alpha)                   | 7020   | Chr:6p24           | -1.1606 | NA  | NA       |
| U02609_at        | 41603_at   | <i>TBL3</i>     | transducin (beta)-like 3                                                                        | 10607  | Chr:16p13.3        | -1.159  | NA  | NA       |
| U11791_at        | 1924_at    | <i>CCHN</i>     | cyclin H                                                                                        | 902    | Chr:5q13.3-q14     | -1.1571 | 8   | -0.9987  |
| L08044_s_at      | 37898_r_at | <i>TFF3</i>     | trefoil factor 3 (intestinal)                                                                   | 7033   | Chr:21q22.3        | -1.1568 | 10  | -1.9217  |
| Y10313_at        | 32901_s_at | <i>IFRD1</i>    | interferon-related developmental regulator 1                                                    | 3475   | Chr:7q22-q31       | -1.1565 | NA  | NA       |
| X66945_at        | 2056_at    | <i>GFGR1</i>    | fibroblast growth factor receptor 1 (fms-related tyrosine kinase 2, Pfeiffer syndrome)          | 2260   | Chr:8p11.2-p11.1   | -1.1562 | NA  | NA       |
| M30625_s_at      | 40371_at   | <i>DRD2</i>     | dopamine receptor D2                                                                            | 1813   | Chr:11q23          | -1.1528 | 9   | -1.0466  |
| U63465_at        | 41792_at   | <i>ABC9C</i>    | ATP-binding cassette, sub-family C (CFTR/MRP), member 8                                         | 6833   | Chr:11p15.1        | -1.1486 | 8   | -1.0246  |
| U77643_at        | 41045_at   | <i>SECTM1</i>   | secreted and transmembrane 1                                                                    | 6398   | Chr:17q25          | -1.1482 | 10  | -1.1104  |
| X07315_at        | 31858_at   | <i>NUTF2</i>    | nuclear transport factor 2                                                                      | 10204  | Chr:16q22.1        | -1.143  | 10  | -1.1329  |
| M94167_at        | 32719_at   | <i>NRG1</i>     | neuregulin 1                                                                                    | 3084   | Chr:8p21-p12       | -1.1418 | NA  | NA       |
| U79246_at        | 40633_at   | <i>DIS3</i>     | mitotic control protein dis3 homolog                                                            | 22894  | Chr:13q21.32       | -1.1397 | 7   | -0.96578 |
| M61156_at        | 32155_at   | <i>TFAP2A</i>   | transcription factor AP-2 alpha (activating enhancer binding protein 2 alpha)                   | 7020   | Chr:6p24           | -1.1388 | NA  | NA       |
| L13436_at        | 276_at     | <i>NPR2</i>     | natriuretic peptide receptor B/guanylate cyclase B (atrialnatriuretic peptide receptor B)       | 4882   | Chr:9p21-p12       | -1.1381 | 8   | -1.0214  |
| X95404_at        | 33659_at   | <i>CFL1</i>     | cofilin 1 (non-muscle)                                                                          | 1072   | Chr:11q13          | -1.1381 | 9   | -1.0175  |
| M16364_s_at      | 40863_r_at | <i>CKB</i>      | creatine kinase, brain                                                                          | 1152   | Chr:14q32          | -1.1372 | NA  | NA       |
| M86752_at        | 207_at     | <i>STIP1</i>    | stress-induced-phosphoprotein 1 (Hsp70/Hsp90-organizing protein)                                | 10963  | Chr:11q13          | -1.1368 | 11  | -1.1206  |
| U51205_at        | 32539_at   | <i>COP9</i>     | COP9 homolog                                                                                    | 10920  | Chr:2q37.3         | -1.133  | NA  | NA       |
| Y09216_at        | 761_g_at   | <i>DYRK2</i>    | dual-specificity tyrosine-(Y)-phosphorylation regulated kinase 2                                | 8445   | Chr:12q14.2        | -1.132  | 8   | -1.0244  |
| AF002224_at      | 1193_at    | <i>UBE3A</i>    | ubiquitin protein ligase E3A (human papilloma virus E6-associated protein, Angelman syndrome)   | 7337   | Chr:15q11-q13      | -1.1299 | 5   | -0.94261 |
| U31986_at        | 33532_at   | <i>CART1</i>    | cartilage paired-class homeoprotein 1                                                           | 8092   | Chr:12q21-q22      | -1.1284 | 8   | -1.0577  |
| X86403_at        | 39534_at   | <i>CHRNAE</i>   | cholinergic receptor, nicotinic, epsilon polypeptide                                            | 11465  | Chr:17p13-p12      | -1.1281 | 6   | -0.99131 |
| S53911_at        | 538_at     | <i>CD34</i>     | CD34 antigen                                                                                    | 947    | Chr:1q32           | -1.1248 | 6   | -0.98923 |
| M83554_at        | 34929_at   | <i>TNFRSF8</i>  | tumor necrosis factor receptor superfamily, member 8                                            | 943    | Chr:1p36           | -1.1247 | 9   | -1.0822  |
| M61156_at        | 792_s_at   | <i>TFAP2A</i>   | transcription factor AP-2 alpha (activating enhancer binding protein 2 alpha)                   | 7020   | Chr:6p24           | -1.1244 | NA  | NA       |
| U64871_at        | 34028_at   | <i>GPR19</i>    | G protein-coupled receptor 19                                                                   | 2842   | Chr:12p12.3        | -1.1227 | 9   | -1.0449  |
| X69978_at        | 2063_at    | <i>ERCC5</i>    | excision repair cross-complementing rodent repair deficiency, complementation group 5           | 2073   | Chr:13q22          | -1.119  | NA  | NA       |
| U95057_at        | 36737_at   | <i>GPRBA4</i>   | gamma aminobutyric acid receptor type 4                                                         | 1413   | Chr:2q12.1         | -1.1182 | 7   | -1.0149  |
| U77970_at        | 38459_at   | <i>NPAS2</i>    | neuronal PAS domain protein 2                                                                   | 4862   | Chr:20p11.2        | -1.1181 | NA  | NA       |
| U33841_at        | 1863_s_at  | <i>ATM</i>      | ataxia telangiectasia mutated (includes complementation groups A, C and D)                      | 472    | Chr:11q22-q23      | -1.1161 | NA  | NA       |
| U00943_at        | 40251_at   | <i>HRB2</i>     | HIV-1 rev binding protein 2                                                                     | 11103  | Chr:12q21.1        | -1.1124 | 8   | -0.95021 |
| S79639_at        | 32164_at   | <i>EXT1</i>     | exostosins (multiple) 1                                                                         | 2131   | Chr:8q24.11-q24.13 | -1.1107 | 10  | -1.2447  |
| U08998_at        | 35657_at   | <i>TARBP2</i>   | TAR (HIV) RNA binding protein 2                                                                 | 6895   | Chr:12q12-q13      | -1.1092 | 7   | -1.0312  |
| U57093_at        | 808_at     | <i>RAB27B</i>   | RAB27B, member RAS oncogene family                                                              | 5874   | Chr:18q21.2        | -1.1081 | 8   | -1.0717  |
| U55054_at        | 38625_g_at | <i>SLC12A4</i>  | solute carrier family 12 (potassium/chloride transporters), member 4                            | 6580   | Chr:16q22.1        | -1.1061 | 10  | -1.1074  |
| U64871_at        | 156_s_at   | <i>GPR19</i>    | G protein-coupled receptor 19                                                                   | 2842   | Chr:12p12.3        | -1.1049 | 9   | -1.0449  |
| U74324_at        | 38264_at   | <i>RAB1F</i>    | RAB1F, member RAS oncogene family                                                               | 5877   | Chr:14q32-q41      | -1.103  | 7   | -0.97474 |
| X66945_at        | 36168_at   | <i>GFGR1</i>    | fibroblast growth factor receptor 1 (fms-related tyrosine kinase 2, Pfeiffer syndrome)          | 2260   | Chr:8p11.2-p11.1   | -1.102  | NA  | NA       |
| L40027_at        | 632_at     | <i>GSK3A</i>    | glycogen synthase kinase 3 alpha                                                                | 2931   | Chr:19q13.2        | -1.1016 | 8   | -1.0508  |
| M20867_s_at      | 37341_at   | <i>GLUD1</i>    | glutamate dehydrogenase 1                                                                       | 2746   | Chr:10q23.3        | -1.1007 | 9   | -1.0341  |
| U79303_at        | 40677_at   | <i>HSU79303</i> | protein predicted by clone 23882                                                                | 29903  | Chr:19q13.42       | -1.0997 | NA  | NA       |
| U77970_at        | 39548_at   | <i>NPAS2</i>    | neuronal PAS domain protein 2                                                                   | 4862   | Chr:20p11.2        | -1.0994 | NA  | NA       |
| U70064_s_at      | 35695_at   | <i>CHS1</i>     | Chediak-Higashi syndrome 1                                                                      | 1130   | Chr:14q2.1-q42.2   | -1.0941 | 6   | -0.87769 |

|             |            |                |                                                              |       |                     |         |    |          |
|-------------|------------|----------------|--------------------------------------------------------------|-------|---------------------|---------|----|----------|
| M96980_at   | 32189_g_at | <i>MYT1</i>    | myelin transcription factor 1                                | 4661  | Chr:20q13.33        | -1.0917 | 6  | -0.9876  |
| L76517_at   | 35658_at   | <i>PSEN1</i>   | presenilin 1 (Alzheimer disease 3)                           | 5663  | Chr:14q24.3         | -1.0915 | 8  | -1.0011  |
| U09368_at   | 40245_at   | <i>ZNF140</i>  | zinc finger protein 140 (clone pHZ-39)                       | 7699  | Chr:12q24.32-q24.33 | -1.0913 | 8  | -1.026   |
| U58637_s_at | 37071_at   | <i>CNGB1</i>   | cyclic nucleotide gated channel beta 1                       | 1298  | Chr:16q13           | -1.0883 | 8  | -1.0172  |
| Y00083_s_at | 971_s_at   | <i>TGFB2</i>   | transforming growth factor, beta 2                           | 7042  | Chr:1q41            | -1.0851 | NA | NA       |
| Y11999_at   | 34209_at   | <i>ITPKC</i>   | inositol 1,4,5-trisphosphate 3-kinase C                      | 80271 | Chr:19q13.1         | -1.0794 | 10 | -1.081   |
| S53911_at   | 38747_at   | <i>CD34</i>    | CD34 antigen                                                 | 947   | Chr:1q32            | -1.0656 | 6  | -0.98923 |
| L04569_at   | 33622_at   | <i>CACNA1C</i> | calcium channel, voltage-dependent, L type, alpha 1C subunit | 775   | Chr:12p13.3         | -1.0606 | 6  | -0.994   |
| M13928_s_at | 34506_at   | <i>ALAD</i>    | aminolevulinate, delta-, dehydratase                         | 210   | Chr:9q34            | -1.0553 | 4  | -0.9175  |
| L37936_at   | 39659_at   | <i>TSFM</i>    | Ts translation elongation factor, mitochondrial              | 10102 | Chr:12q13-q14       | -1.0406 | NA | NA       |
