# Supplementary material
Source: PubMed Central journal article supplement (PMC4136479)
Supplement: NIHMS576591-supplement-STable_4.pdf [file NIHMS576591-supplement-STable_4.pdf]

**Supplementary Table S4.** Comparison of studies identifying a metastatic signature in HNSCC

| <b>Study</b>                                 | <b>No. of Normal (N), Primary (P), Metastatic (M) Samples</b> | <b>No. Samples Used to Develop Metastatic Signature</b> | <b>Gene Expression Array</b>                              | <b>No. of Transcripts Interrogated</b>    | <b>Comparison</b>                                                    | <b>Statistic</b>                                                        | <b>Journal/ Figure with Gene List</b>            |
|----------------------------------------------|---------------------------------------------------------------|---------------------------------------------------------|-----------------------------------------------------------|-------------------------------------------|----------------------------------------------------------------------|-------------------------------------------------------------------------|--------------------------------------------------|
| Colella (this study)                         | 28 N, 28 P, 14 M (matched)                                    | 14 HNSCC primaries and metastases                       | Affymetrix HuGeneFL & U95Av2                              | 5,600 & 9,600 genes<br>4,509 common genes | matched metastases (14) vs. primaries (14)                           | 46 genes, sign test & >1.5 fold diff.                                   | This paper; Table 1                              |
| Chung (Chung <i>et al.</i> , 2004)           | 60 P                                                          | 26 primaries (no oral SCC)                              | Agilent Human1 cDNA array (30 tumor pool as ref.)         | 12,814 cDNAs                              | LN+ (18) vs. LN- (8)                                                 | 500 top genes in 10 permutations of training/test set                   | <i>Cancer Cell</i> 2004; Supplemental Figure S2  |
| Cromer (Cromer <i>et al.</i> , 2004)         | 34 P, 4 N (unmatched)                                         | 30 late stage hypopharyngeal primaries (all LN+)        | Affymetrix U95A                                           | 9,600 genes<br>12,500 transcripts         | mets (15) vs. no mets (10) (all were LN+ and had complete resection) | 164 genes, union of t-test and >1.5 fold diff. in 1/2 of samples        | <i>Oncogene</i> 2004; Supplementary Table        |
| Roepman (Roepman <i>et al.</i> , 2005)       | 82 P                                                          | 82 HNSCC primaries (+22 for validation set)             | Qiagen Human Array-ready oligo set (vs. common ref. pool) | 21,329 genes                              | LN+ (44) or M+ (1) vs. LN-/M- (37)                                   | Iteratively generated test/training sets, optimal classifier: 102 genes | <i>Nature Genet.</i> 2005; Supplementary Table 2 |
| O'Donnell (O'Donnell <i>et al.</i> , 2005)   | 18 P                                                          | 18 HNSCC primaries (+4 for validation set)              | Affymetrix U133A                                          | 14,500 genes, 18,400 transcripts          | LN+ (11) vs. LN- (7)                                                 | 116 genes (SAM with low-expression genes omitted)                       | <i>Oncogene</i> 2005; Supplementary Figure 1     |
| Hunter (Hunter <i>et al.</i> , 2005)         |                                                               | 16 HNSCC cell lines                                     | Affymetrix U133A+B                                        | 33,000 genes<br>39,000 transcripts        | mortal (7) vs. immortal (9) HNSCC cell cultures                      | 160 genes, SAM                                                          | <i>Cancer Res.</i> 2006; Table S3                |
| Schmalbach (Schmalbach <i>et al.</i> , 2004) | 20 P                                                          | 20 OSCC/OPSCC primaries                                 | Affymetrix U95Av2                                         | 9,600 genes<br>12,500 transcripts         | LN+ (13) vs. LN- (7)                                                 | 101 genes, 57 of these showed diff. between N, P also                   | <i>Arch. Otol. HN Surg.</i> 2004; Figure 3       |
